# Supplementary material for: Prognosis and therapeutic significance of IGF-1R-related signaling pathway gene signature in glioma
Source: Front Cell Dev Biol. 2024 Apr 11;12:1375030. doi: 10.3389/fcell.2024.1375030 (PMC11043541; doi:10.3389/fcell.2024.1375030)
Supplement: Supplementary file 1 [file Table1.XLSX]

## Sheet: Supplementary Table 1
TCGA-GBMLGG																			CGGA325																			CGGA693
ID	AKT1	IGFBP5	IGF1R	JAK3	PIK3CD	RPS6KA1	IKBKB	MDM2	SOCS1	NFKB1	ELK1	PCNA	IL2RG	IGFBP2	FES	HSP90B1	IGF1RS		ID	AKT1	IGFBP5	IGF1R	JAK3	PIK3CD	RPS6KA1	IKBKB	MDM2	SOCS1	NFKB1	ELK1	PCNA	IL2RG	IGFBP2	FES	HSP90B1	IGF1RS		CGGA_ID	AKT1	IGFBP5	IGF1R	JAK3	PIK3CD	RPS6KA1	IKBKB	MDM2	SOCS1	NFKB1	ELK1
TCGA-06-0178-01	10.611	11.3639	7.736	6.9272	7.3093	10.7339	10.0886	10.8094	4.6781	8.8693	10.0794	12.7847	7.0156	9.7243	6.8619	11.7749	11.9931		CGGA_1001	80.46	178.08	6.77	25.87	17.5	48.58	25.94	23.18	8.93	14.77	16.42	34.34	26.54	120.89	22.67	227.99	54.8027		CGGA_1002	49.55	13.41	3.83	3.03	5.94	9.43	19.59	123.59	1.27	2.64	31.36
TCGA-02-2483-01	12.2624	12.8289	10.5443	7.2452	13.5021	9.5675	9.233	10.9203	4.6716	9.236	9.9849	12.7833	6.7295	14.1291	7.419	14.6553	13.089		CGGA_1006	83.78	109.75	17.07	4.08	6.27	8.79	28.06	12.3	3.36	12.88	83.94	118.36	3.44	594.07	12.75	132.1	221.342		CGGA_1003	39.98	8.26	4.03	0.8	1.09	1.96	18.11	88.89	1.11	2.58	11.51
TCGA-06-5417-01	10.7974	14.5148	9.6722	4.0239	5.6616	7.1712	10.148	10.708	3.3981	8.9576	8.8543	11.5604	3.6381	10.2305	4.9789	13.2774	11.4443		CGGA_1007	75.04	289.95	5.26	1.49	2.05	8.18	24.76	1131.07	4.2	9.2	45.19	59.59	2.54	164.03	7.96	218.85	164.022		CGGA_1010	19.72	4.27	5.31	0.58	0.34	1.87	6.31	3.59	0	2.53	3.26
TCGA-15-1444-01	11.6443	14.2818	9.4409	6.6844	7.9302	9.8103	10.0645	10.4356	5.0442	9.8131	9.1113	10.5367	5.6473	8.9654	6.9908	13.0996	11.1638		CGGA_1011	44.32	128.2	6.4	6.8	7.47	20.53	19.23	17.85	1.82	11.58	15.49	26.47	11.52	87.82	10.64	287.91	45.6281		CGGA_1014	82.68	31.97	2.56	2.12	4.79	8.93	29.4	57.17	3.49	3.7	35.05
TCGA-06-2570-01	11.7161	12.7116	10.9512	8.6361	8.9299	10.1549	9.7031	10.7339	4.0482	9.4838	9.7115	10.9723	5.3686	11.1978	7.6379	13.3202	11.8887		CGGA_1015	102.55	181.34	3.92	10.86	10.84	17.09	19.21	32.33	5.51	17.91	47.47	50.14	8.99	871.2	20.06	716.25	291.44		CGGA_1017	38.87	15.01	7.22	2.18	6.85	5.63	8.2	44.33	0.21	3.06	71.86
TCGA-19-2629-01	11.5146	15.0911	9.5343	7.7645	7.9213	10.1687	9.986	10.0794	6.6862	9.5945	9.865	10.9677	6.1483	9.3524	7.2409	12.9398	11.6896		CGGA_1023	91.88	194.5	2.13	0.9	2.77	5.15	26.7	886.72	5.62	4.01	13.07	34.2	4.82	829.61	4.71	195.58	322.982		CGGA_103	72.71	19.23	14.13	0.6	2.33	6.19	23.54	16.1	0.69	8.28	18.12
TCGA-27-2521-01	12.0227	14.7184	9.7469	4.7779	6.6266	8.8554	9.8837	10.0656	3.5328	9.183	9.9281	11.4598	4.5527	13.1154	6.7498	13.2756	12.3341		CGGA_1024	122.44	140.7	3.51	1.78	2.41	8.67	19.03	21.99	2.77	9.68	25.12	78.03	1.83	284.25	3.67	289.96	91.901		CGGA_1030	44.63	7.25	4.48	2.17	3.25	4.85	18.1	30.82	0.6	2.94	35.06
TCGA-26-1442-01	11.5917	14.7141	10.6194	6.3062	7.9541	9.0022	10.2467	10.2732	3.1483	8.725	9.3189	9.8235	4.3873	8.5783	7.1343	12.7704	10.6254		CGGA_1026	75.45	106.18	7.85	1.33	3.08	9.69	23.4	1244.74	0.83	8.13	31.25	62.85	2.97	268.25	6.31	209.31	183.683		CGGA_1032	22.43	35.32	5.83	6.87	6.13	13.93	15.65	12.42	1.19	12.28	6.62
TCGA-06-0129-01	11.4517	12.6745	10.6879	7.9746	9.1653	10.056	10.6459	11.0766	5.0142	9.8033	9.336	11.6923	6.8929	8.7215	6.8472	12.9284	11.6048		CGGA_1034	61.73	108.95	2	2.87	5.68	10.23	24.77	14.27	3.48	7.94	15.99	40.61	3.41	144.21	6.82	241.83	56.3239		CGGA_1033	34.46	1.71	2.23	4.18	5.09	4.48	7.35	36.75	0.72	1.32	9.43
TCGA-E1-5319-01	11.4573	12.0318	11.5633	3.1751	6.5324	8.7982	9.4224	10.8101	3.9503	9.0342	9.0627	9.7657	5.5479	8.4362	6.8361	12.7337	10.3146		CGGA_1035	54.1	323.78	10.98	5.46	5.75	12.56	22.56	66.58	4.22	20.52	33.35	53.14	9.31	828.33	13.69	705.36	308.663		CGGA_1036	96.36	293.01	2.35	1.74	3.06	10.48	23.12	221.75	3.26	7.86	19.52
TCGA-HT-7693-01	11.5805	15.1741	11.2676	7.0188	7.8331	9.0063	9.9866	10.2835	3.5961	9.1409	9.0938	9.2906	5.8473	9.0652	7.3418	13.2427	10.8353		CGGA_1039	73.37	106.46	7.06	0.53	1.51	3.46	19.88	18.84	0.73	7.71	19.11	95.63	1.5	294.4	2.46	176.15	108.939		CGGA_1037	27.04	4.83	1.08	3.85	2.52	4.75	10.53	34.91	1.65	0.41	6.59
TCGA-HT-8108-01	11.7952	11.9825	11.1094	6.4259	7.9327	9.375	10.1659	10.4141	4.1875	9.1821	9.2188	9.8889	5.3856	6.9474	7.3952	12.2539	10.0138		CGGA_1045	86.8	132.58	2.59	6.64	3.31	14.04	23.48	34.75	10.32	15.19	21.59	134.59	5.73	837.44	17.22	377.47	289.618		CGGA_1041	44.82	36.91	8.33	0.98	4.74	8.38	18.03	14.44	0.98	4.75	17.38
TCGA-S9-A7J2-01	11.7128	11.2069	11.402	5.5341	7.3379	7.1062	10.0635	10.5085	3.9521	8.8458	8.9237	9.6777	3.2299	7.9424	6.0642	12.8678	9.80431		CGGA_1049	51.72	270.9	8.43	2.72	4.58	7.73	22.06	29.97	1.88	19.27	24.03	57.12	3.26	319.94	9.41	374.36	139.315		CGGA_1048	76.97	86.87	7.48	1.98	3.6	5.51	18.19	64.26	15.06	7.76	25.38
TCGA-FG-A6J3-01	11.2635	10.5132	10.4051	9.4925	8.845	10.384	9.4796	9.4022	6.1885	8.0601	8.2739	11.0042	7.2908	11.1986	9.076	14.1317	11.1708		CGGA_1072	75.82	183.67	2.51	1.46	3.33	8.94	20.22	10.99	2.92	10.97	35.47	131.38	4.1	524.17	3.05	162.73	198.206		CGGA_1051	38.36	16.1	3.03	2.08	2.96	3.77	11.34	42.64	1.16	2.79	22.14
TCGA-S9-A6TX-01	11.7137	12.3311	10.9108	4.1199	6.2552	8.1058	9.9866	10.4036	4.5312	9.0065	9.324	9.8036	3.7761	8.2964	6.8338	12.8094	10.2046		CGGA_1077	79.19	51.68	2.2	3.55	3.97	26.99	21.39	43.21	10.54	12.09	18.42	127.29	5.09	989.29	18.09	432.81	330.006		CGGA_1055	71.97	11.54	6.37	0.4	1.81	6.22	29.88	20.39	1.74	6.37	15.68
TCGA-VM-A8C8-01	11.5537	13.0068	10.1453	5.608	7.5014	8.8342	10.0982	10.1446	4.1389	9.7926	8.741	10.1486	4.5758	6.0195	7.2926	12.6989	9.84048		CGGA_1079	56.56	59.32	2.54	0.98	4.2	6.83	18.48	36.21	5.11	7.56	12.42	63.11	4.68	169.51	9.53	305.95	66.0094		CGGA_1057	53.91	26.32	1.85	2.7	9.12	24.96	28.23	56.71	5.02	5.31	5.5
TCGA-DU-A5TS-01	12.0143	12.15	10.3326	6.8388	7.6352	9.3351	10.2365	10.3763	4.1986	8.3318	8.278	10.2468	5.0278	9.2583	7.5566	12.9116	10.2616		CGGA_1083	68.85	366.08	3.81	12.48	11.06	30.86	31.14	40.03	1.58	11.69	26.74	52.59	9.54	369.2	17.69	484.75	160.436		CGGA_1065	43.61	6.17	5.03	0.12	0.54	1.45	27.94	25.07	0.18	5.26	15.19
TCGA-DB-A4XA-01	11.8825	11.4916	10.4543	5.4797	8.1314	8.6684	9.8954	10.323	3.9918	8.5416	9.1996	9.9624	5.8549	7.937	7.3272	12.9001	9.98976		CGGA_1091	111.35	371.33	5.32	1.81	2.92	7.42	25.27	27.28	2.62	11.83	26.73	65.35	0.96	1130.49	6.21	237.57	377.359		CGGA_1066	78.55	11.49	8.49	3.86	4.72	13.6	22.31	13.05	3.51	6.82	14.71
TCGA-HT-A4DV-01	11.5881	11.0565	10.5994	6.2365	7.983	9.6092	9.6018	10.3692	4.1538	8.9824	8.7582	9.6586	5.0444	8.4668	7.2346	12.9299	10.1467		CGGA_1109	77.58	86.6	4.04	0.91	2.9	4.26	34.67	22.34	4.63	5.83	16.74	60.87	2.16	369.38	5.99	179.37	123.236		CGGA_1075	105.52	58.03	2.53	13.35	9.22	22.47	62.65	226.61	11.27	4.71	12.19
TCGA-E1-5311-01	11.2908	11.6643	10.9333	5.3516	7.0801	7.0401	9.6339	10.4836	3.2229	8.5995	9.8971	9.5019	4.0116	8.9432	6.1516	12.337	10.345		CGGA_1124	56.53	57.96	1.72	6.55	4.79	17.58	17.01	25.22	32.5	15.53	22.53	98.37	11.15	306.04	21.31	280.9	120.394		CGGA_1086	51.31	43.95	3.18	4.11	4.4	6.61	7.77	2.94	0.24	2.33	7.73
TCGA-E1-5305-01	11.0917	10.7365	11.2019	5.4153	7.1983	8.4708	9.7032	10.83	2.6344	9.3209	9.8221	9.9743	4.4771	8.7724	7.036	12.0867	10.6815		CGGA_1139	51.82	141.86	3.45	2.44	4.53	12.51	31.98	19.15	5.46	4.85	24.99	27.96	4.33	79.76	6.45	187.27	42.9311		CGGA_1087	61.22	12.44	6.16	0.28	0.79	1.5	19.87	51.34	1.04	2.38	12.11
TCGA-F6-A8O4-01	11.6489	13.1297	10.5522	5.714	7.2867	7.2927	9.6497	9.9294	3.8851	8.8583	9.7776	9.899	2.9796	6.9076	6.7756	12.6944	9.79993		CGGA_1171	40.55	65.82	3.09	10.85	15.79	30.23	29.93	17.25	4.92	12.52	13.19	50.82	9.69	30.65	12.67	196	29.7882		CGGA_1097	44.25	54.05	3.2	1.02	1.6	7.04	30.19	25.09	4.76	11.2	17.12
TCGA-HT-8113-01	11.1349	12.0965	10.5287	7.7687	8.8738	7.7805	8.9211	9.9725	3.848	8.1163	10.5585	8.9383	4.3683	8.153	7.0381	12.6226	10.1098		CGGA_1180	67.44	371.83	2.71	2.9	5.7	15.79	38.43	44.19	12.93	10	24.82	92.25	8.01	1079.57	10.5	412	387.67		CGGA_1100	18.85	3.18	11.82	0.26	0.44	1.95	14.1	5.23	0.06	1.67	6.55
TCGA-DH-A66G-01	11.3415	11.4736	11.0823	8.3828	7.9471	8.5001	9.9573	9.944	4.4516	9.3328	9.9761	9.5518	5.7912	7.1269	7.7129	12.6086	10.2551		CGGA_1214	116.66	189.12	2.45	1.1	3.91	6.16	34.14	31.62	2.26	8.57	21.71	51.03	2.18	743.25	8.22	192.53	235.226		CGGA_1101	14.65	33.14	18.25	0.39	4.13	2.05	13.16	5.51	0.61	2.81	10.88
TCGA-HT-7620-01	11.2186	12.0684	10.5272	4.5641	8.0837	9.4041	10.0477	10.6098	3.3901	9.2428	8.5183	10.0172	3.3157	7.4105	6.5585	13.1612	10.0828		CGGA_1216	46.51	1242.03	3.05	3.27	2.47	9.98	23.99	29.05	4.17	8.17	20.99	31.63	2.87	131.14	9.71	222.1	163.492		CGGA_1103	71.29	54.16	10.77	0.93	1.47	8.98	16.39	16.94	0.26	9.13	31.26
TCGA-P5-A731-01	11.5819	14.2041	10.472	6.9066	7.7427	8.4104	9.858	10.8743	5.0759	9.2909	9.5444	10.6123	3.4236	11.9908	6.7729	13.5134	11.9478		CGGA_1224	73.91	259.24	2.21	22.31	19.73	66.47	41.16	70.48	6.72	9.68	21.92	35.42	32.98	1293.03	29.92	294.28	434.052		CGGA_1106	113.42	377.62	3.79	5.87	9.15	14.29	32.28	15.97	5.94	16.87	31.68
TCGA-HT-7480-01	11.4701	11.3241	11.238	5.1347	7.5168	7.6486	10.1832	10.4341	3.3308	8.8306	9.3598	9.2294	3.0961	7.2015	5.5519	13.0731	9.69863		CGGA_1234	66.29	242.03	8	2.6	5.24	20.15	21.81	43.4	0.97	11.07	17.75	74.72	3.52	583.81	10.91	754.76	218.474		CGGA_1108	76.64	84.24	8.42	5.76	12.98	17.4	29.25	19.4	3.32	12.56	28.75
TCGA-HT-7689-01	10.8847	13.0995	11.1923	6.2779	7.7144	9.3583	10.1445	10.2846	2.4398	9.718	8.6548	9.7394	3.1424	5.117	6.776	13.162	9.66969		CGGA_1237	85.74	121.4	1.41	1.06	1.77	9.62	20.12	61.38	5.94	6.97	17.84	167.39	3.85	751.61	5.54	374.3	266.978		CGGA_1111	59.16	17.41	1.92	2.92	3.98	14.77	24.23	45.31	2.25	3.56	9
TCGA-HT-8109-01	11.2114	12.576	10.6634	6.3806	7.908	8.3789	9.6068	10.4665	4.1446	8.7996	9.9431	9.5875	4.3683	5.8421	6.6386	13.0708	9.73425		CGGA_1240	68.44	132.25	6.33	6.54	11.89	24.09	23.39	56.35	2.65	25.78	28.18	77.21	6.25	597.84	9.9	348.21	216.316		CGGA_112	104.27	11.11	5.08	1.61	2.24	5.27	17.96	12.65	0.67	4.49	11.93
TCGA-S9-A7R1-01	11.6653	14.2465	11.2182	5.5761	6.2228	6.1718	9.1699	10.3063	3.5726	8.7171	10.0244	9.2471	3.1349	8.3203	5.9716	12.939	10.0942		CGGA_1251	78.02	53.32	5.99	0.59	2.33	7.53	16.6	27.8	0.72	6.57	12.75	115.29	2.21	144.53	3.2	407.09	61.065		CGGA_1120	21.93	9.99	5.17	0.38	0.78	1.04	5.81	4.73	0.04	3.66	6.44
TCGA-FG-A710-01	11.6393	10.8815	10.8008	7.3849	8.4547	9.4742	10.0106	10.3655	4.8097	9.2369	9.7175	10.1695	6.6446	7.6676	7.8696	13.0683	10.4544		CGGA_1258	63.97	134.47	2.1	3.93	6.27	18.92	35.02	42.97	9.45	9.6	23.37	47.82	7.57	1122.15	11.07	239.68	367.838		CGGA_1126	56.8	6.22	4.1	1.49	2.38	5.91	21.6	41.23	2.88	3.42	8.49
TCGA-S9-A7J0-01	12.1362	10.4027	11.4152	4.4858	6.8462	7.8539	10.3451	10.3563	2.6116	8.3998	9.8557	12.3109	4.6231	10.4463	6.0758	12.8745	11.1044		CGGA_1263	52.04	20.49	4.76	1.25	2.1	9.63	20.38	97.6	1.78	1.89	9.57	33.03	3.06	68.7	4.42	108.52	27.1593		CGGA_1127	23.13	1.66	1.58	1.09	1.39	5.6	15.49	29.5	2.06	1.33	2.75
TCGA-DU-A6S6-01	11.7944	11.7314	10.7198	6.3303	7.88	6.8802	9.9145	9.8022	4.0284	8.5298	10.1059	9.0061	2.2719	8.1346	6.9035	12.4923	9.81441		CGGA_1270	48.31	39.44	2.21	4.58	4.5	19.72	15.9	61.39	7.24	5.38	16.77	71.28	15.97	202.46	5.87	201.66	81.1251		CGGA_1131	72.36	5.36	10.72	0.87	0.93	2.81	20.78	33.17	0.38	8.5	19.62
TCGA-DU-7302-01	10.5902	12.5061	11.5665	5.5962	7.5942	7.3924	9.5226	10.9124	1.4352	8.1318	9.6909	9.4887	3.9369	6.7506	6.1814	12.9375	9.84641		CGGA_1280	35.3	145.16	4.12	1.08	2.78	11.26	30.53	16.21	0.82	8.09	16.33	70.6	1.6	32.68	6.08	192.98	41.271		CGGA_1134	94.85	940.55	9.65	4.06	4.56	7.57	15.47	48.52	4.43	11.72	24.86
TCGA-HW-7486-01	11.4513	10.9904	10.4436	5.4359	7.7115	9.3226	9.7451	10.4539	3.1405	9.0308	8.5239	9.9076	4.3855	6.5939	6.9454	13.0984	9.54789		CGGA_1281	31.63	35.12	5.46	1.17	3.67	2.98	8.8	19.86	0.33	3.51	55.87	22.82	1.41	21.64	2.63	97.76	22.6143		CGGA_1135	67.48	40.97	4.11	1.33	5	17.93	37.1	1809.3	7.06	7.29	13.76
TCGA-FG-7634-01	11.5111	10.6322	10.1287	7.6248	8.0965	9.1706	10.143	10.6521	3.3718	9.4709	9.3921	10.3216	5.454	8.4262	6.9232	13.5157	10.6148		CGGA_1284	90.57	128.17	2.86	5.45	7.61	22.45	23.42	29.85	3.3	15.67	20.69	67.13	3.77	366.55	8.94	345.05	128.18		CGGA_1137	19.8	8.27	12.08	1.74	2.41	8.73	4.16	15.05	0.09	4.66	6.65
TCGA-DU-6407-01	12.0018	12.2706	11.0992	5.0357	7.7188	8.5116	10.2885	10.3519	3.1461	9.0159	8.9961	10.1721	3.8429	7.4179	6.4685	12.9111	9.92148		CGGA_1292	28.82	77	7.79	0.69	9.03	4.22	9.28	24.02	1.04	2.86	19.57	48.46	4.07	87.54	3.06	168.07	45.7467		CGGA_1138	66.78	33.84	6.97	0.61	2.76	4.14	20.06	34.68	7.14	3.86	53.51
TCGA-HT-8010-01	11.4052	12.7163	10.8557	6.9094	7.8957	8.2666	9.827	10.2681	4.707	8.668	10.1053	9.5505	4.2711	7.6271	7.105	13.1219	10.2697		CGGA_1299	101.51	107.01	3.89	1.88	3.08	7.24	29.84	43.82	2.31	7.52	22.28	53.33	3.12	1182.45	9.14	271.53	369.652		CGGA_1141	49.95	23.3	2.75	2.91	3.44	5.85	9.6	28.54	1.25	2.88	48.33
TCGA-P5-A5F1-01	11.4438	12.8087	10.1548	5.0107	7.9451	8.6954	10.105	9.9717	3.5739	9.2548	8.5953	10.4958	5.3458	8.3499	7.4143	13.2903	10.493		CGGA_1313	58.81	267.89	7.87	2.29	4.65	13.76	22.15	33.71	3.84	12.51	20.83	72.7	2.88	316.18	16.73	434.23	137.491		CGGA_1142	74.07	169.14	3.66	2.22	2.05	8.37	36.58	36.66	8.29	4.58	15.65
TCGA-DU-6542-01	11.0341	13.1864	11.0476	7.6012	8.8649	9.5367	10.2432	10.172	1.7718	9.9422	9.0172	9.7241	4.8665	9.4033	7.2279	13.7785	11.2159		CGGA_1320	81.17	325.6	9.8	1.23	4.67	6.9	22.01	66.49	2.88	3.32	16.58	18.84	3.18	200.3	5.81	240.86	84.847		CGGA_1144	40.63	9.57	3.64	1.44	3.89	3.89	11.11	20.57	0.62	2.71	31.12
TCGA-FG-7638-01	11.4419	10.825	10.3698	5.0671	7.0768	7.9877	9.5589	10.6197	4.7789	8.4816	9.1819	9.9871	4.2962	7.4996	6.5845	13.1812	9.76742		CGGA_1332	120.13	272.75	3.66	1.44	2.26	6.35	25.4	40.49	1.78	7.79	20.82	162.11	1.63	2418.97	4.07	248.6	781.148		CGGA_1147	84.14	28.3	4.88	0.59	1.6	3.53	15.33	20.78	0.73	6.26	15.94
TCGA-DH-5143-01	11.4948	12.8047	10.6392	5.3578	8.0938	9.0722	9.7033	10.1313	2.4559	9.2024	10.0172	10.2468	4.5037	6.9191	7.0832	13.3163	10.2388		CGGA_1338	56.52	246.5	4.25	3.19	6.86	8.35	26.07	21.18	4.44	15.75	23.47	71.32	10.18	426.93	9.67	363.66	170.587		CGGA_1148	49.12	148.11	1.66	2.45	1.78	7.2	25.54	29.81	2.81	6.14	10.59
TCGA-CS-5393-01	11.6313	12.2711	11.1024	6.3234	8.5571	9.6538	10.0133	10.4552	2.6427	9.2983	9.9906	9.1778	4.6089	7.9954	7.5593	12.8092	10.4255		CGGA_1340	44.2	93.77	10.1	2.4	3.4	8.27	22.68	17.08	0.56	6.21	18.29	55.9	1.8	30.5	5.01	183.76	28.4456		CGGA_1152	45.71	19.76	2.3	11.92	7.42	15.28	17.82	38.97	5.18	5.53	6.45
TCGA-DU-7011-01	11.4559	12.4951	10.48	8.4019	9.0339	9.6972	9.6082	10.2366	3.7863	8.9682	9.7385	9.6019	5.8158	8.3661	7.794	13.0177	10.5882		CGGA_1342	48.85	350.69	7.3	5.28	6.54	16.22	30.29	56.86	15.08	25.25	30.89	124.25	10.75	357.62	19.21	596.3	183.271		CGGA_1155	46.97	9.31	2.26	0.9	1.69	6.78	16.99	44.1	1.77	1.66	5.38
TCGA-TM-A84Q-01	11.6031	10.764	10.9287	8.6288	8.0105	9.7245	10.3295	10.2637	3.053	9.5969	8.5929	9.7619	5.2812	7.4437	7.382	12.5509	10.0661		CGGA_1408	57.98	132	5.68	3.78	9.85	20.33	32.64	282.97	2.91	7.88	15.5	37.4	12.62	103.73	10.55	128.29	66.8081		CGGA_1156	73.83	7.74	4.3	3.84	4.47	8.62	29.89	18.97	3.84	4.27	10.42
TCGA-DB-5281-01	11.4272	12.7542	10.6365	6.5287	7.6785	8.0464	9.5918	10.41	2.3574	9.156	9.1182	9.6277	4.2231	9.1738	6.9036	12.7914	10.5087		CGGA_235	46.48	27.64	4.9	0.42	1.71	2.01	11.54	14.05	0.76	5.25	17.95	32.59	0.46	4.89	2.63	132.61	5.14125		CGGA_1157	38.78	82.39	2.03	1.42	1.98	3.78	18.85	29.78	4.11	4.04	12.05
TCGA-S9-A6WI-01	11.1937	10.7314	10.2994	8.1019	9.1733	8.4903	8.8568	9.8067	3.4248	8.0891	10.4977	9.1593	2.2709	9.0575	7.7074	12.5722	10.1829		CGGA_269	51.7	134.73	5.86	3.26	8.16	15.7	24.2	30.77	3.41	12.5	9.66	34.36	10.35	31.2	8.38	203.87	27.2352		CGGA_1158	44.69	3.62	4.89	0.44	1.28	4.06	32.78	53.89	1.3	2.6	10.49
TCGA-HT-7605-01	11.2933	11.3633	10.6188	5.9996	8.0481	8.3686	9.5295	10.3256	2.8676	8.9475	9.43	9.6976	4.2722	7.0979	6.5464	13.3301	9.85267		CGGA_274	83.22	85.61	4.57	3.07	4.3	6.51	16.93	29.47	1.5	11.48	13.75	141.15	3.22	677.17	9.34	475.67	234.312		CGGA_1159	41.01	9.51	2.98	2.76	4.73	5.63	14.13	14.91	0.81	2.85	32.83
TCGA-DB-5270-01	11.4054	11.8065	10.3706	7.1787	8.8832	9.1797	9.4047	9.7667	3.1989	8.6187	9.9479	9.5948	5.3048	9.2557	6.8224	13.0131	10.6148		CGGA_276	42.22	46.02	7.44	0.61	2.6	15.36	15.42	28.01	0.33	6.41	7.8	34.72	1.57	4.11	3.49	135.32	9.01911		CGGA_1161	32.58	5.66	1.68	1.78	3.23	3.1	10.53	29.52	1.93	1.92	9.07
TCGA-S9-A6WQ-01	11.5954	12.0698	10.9423	7.4075	8.4696	9.8797	10.038	9.7607	4.5096	9.0924	8.7865	10.0889	5.35	7.2927	8.0444	12.5369	10.1074		CGGA_323	33.29	10.92	5.97	1.97	6.25	5.5	9.37	10.81	0.28	3.63	32.92	17.14	0.89	16.93	6.44	127.98	11.6154		CGGA_1162	22.33	4.98	0.72	1.57	2.17	5.22	17.66	15.26	1.22	0.29	2.37
TCGA-HT-8106-01	11.3709	13.7575	10.5556	10.4194	10.144	11.1357	10.6133	10.9785	6.3018	10.3838	9.5563	9.8208	9.8851	9.3952	9.376	13.1184	12.0354		CGGA_330	43.89	141.71	5.49	7.4	9.47	19.2	25.37	36.6	2.78	10.36	8.7	73.66	7.43	68.52	8.29	163.35	49.8599		CGGA_1169	85.45	17.53	4.33	0.84	3.87	9.43	30.66	24.35	2.51	5.12	10.96
TCGA-HT-7608-01	11.4854	12.8269	11.2514	5.8896	7.3353	8.3627	9.6813	10.6545	3.348	9.128	9.4497	9.9919	3.4569	8.6504	6.935	13.3202	10.5418		CGGA_413	101.59	820.07	5.49	1.35	2.59	8.32	19.54	32.91	5.66	13.16	19.36	44.42	2.52	687.24	6.75	218.71	279.643		CGGA_1172	59.49	50.06	2.7	15.04	7.91	19.5	32.03	29.97	5.42	4.88	9.03
TCGA-W9-A837-01	11.449	11.8352	10.9594	5.5603	7.3619	7.4062	9.7916	10.2986	4.3525	8.8338	10.0717	9.3325	2.7793	6.9476	6.3052	12.9946	9.78572		CGGA_426	119.65	335.63	9.86	1.74	4.79	10.32	22.66	33.65	12.81	16.39	26.21	31.37	4.04	407.53	11.27	329.1	143.916		CGGA_1181	53.06	12.96	2.97	1.17	1.76	6.47	19.17	42.02	1.12	3.11	5.34
TCGA-TM-A7C5-01	11.7539	9.9497	10.5932	4.5182	6.4225	6.6045	9.8359	10.846	3.9995	7.9089	9.2195	10.0967	4.5891	7.0371	6.1801	12.9264	9.26896		CGGA_448	65.23	43.64	2.84	12.22	16.52	40.57	21.45	33.98	3.12	15.21	19.43	44.39	3.61	226.65	11.54	301.09	81.6908		CGGA_1183	81.91	49.24	3.85	0.57	1.4	5.55	37.27	30.78	1.94	7.77	8.92
TCGA-S9-A7QY-01	11.6524	11.9998	10.5541	5.3804	7.0555	8.3479	10.1152	10.5844	4.588	8.0794	9.3651	9.4998	3.5725	6.476	6.9857	12.7228	9.40816		CGGA_483	66.14	344.94	11.08	8.49	10.69	15.26	24.48	157.7	3.53	16.94	19.13	157.73	13.15	371.31	12.21	360.34	186.898		CGGA_1191	111.93	16.69	8.89	0.9	0.86	1.88	25.43	21.06	0.64	3.61	15.47
TCGA-S9-A6WO-01	11.733	12.8951	11.0571	5.4565	8.5917	9.2749	10.7067	10.3049	3.232	9.3061	8.7917	9.4244	4.2268	6.2673	7.9822	13.1587	9.75029		CGGA_488	133.29	113.18	5.06	0.63	5.35	12.19	14.63	2172.46	1.19	5.89	35.75	77.55	1.73	227.16	4.94	86.45	217.813		CGGA_1192	103.67	53.33	5.11	10.02	5.21	22.63	30.66	22.89	3.77	8.04	10.68
TCGA-IK-7675-01	11.4848	13.189	11.0697	3.6357	6.3056	8.0315	10.1828	9.4971	2.814	8.6361	9.173	10.2044	3.3957	8.536	5.7124	12.6477	10.2874		CGGA_493	58.91	36.02	8.18	1.02	2.38	7.41	11.64	11.45	0.55	6.05	19.41	23.76	0.47	7.55	2	117.87	1.36291		CGGA_1195	27.23	91.77	1.87	2.26	2.01	3.82	18.84	53.76	5.31	2.65	7.18
TCGA-HT-7601-01	11.5968	12.0651	10.3045	9.633	9.2954	10.4741	10.1163	10.5436	4.084	9.4074	8.7885	10.0752	6.4749	8.1605	8.0891	13.4904	10.6257		CGGA_494	44.82	23.15	6.47	1.43	4.08	8.3	9.54	17.77	0.24	4.79	25.66	19.08	1.03	22.08	6.26	112.61	9.82349		CGGA_1198	11.34	3.05	3.18	0.33	0.89	1.07	4.77	1.77	0.12	0.71	4.62
TCGA-S9-A6U1-01	11.7794	12.0005	10.6514	4.9304	8.1003	8.7517	10.162	10.4458	4.1489	8.7755	8.9519	10.1213	4.0131	6.2766	7.3222	12.8221	9.56962		CGGA_499	70.21	81.16	7.13	2.95	4.26	5.88	27.27	32.45	2.34	7.47	43.25	37.35	1.95	579.5	5.82	433.05	194.175		CGGA_1204	76.71	12.33	10.74	0.26	0.96	1.13	18.66	23.25	0.54	4.02	21.85
TCGA-HT-7880-01	11.2881	12.3369	10.5131	7.0991	8.5727	8.7341	9.5923	9.959	3.8081	8.546	10.0082	9.2582	4.2543	8.0217	7.394	12.6134	10.2276		CGGA_525	82.41	247.64	3.61	13.75	7.33	27.86	33.01	19.25	4.48	10.54	20.35	35.6	12.23	575.61	17.99	298.23	199.91		CGGA_1205	19.05	13.24	5.82	5.21	4.1	3.72	11.36	2.72	0.3	3.65	6.61
TCGA-FG-A6IZ-01	11.6738	8.428	10.3519	5.1344	6.5595	8.0705	9.6901	10.1451	5.3636	7.815	8.2654	10.8642	5.1344	8.0471	7.1033	13.2908	9.46274		CGGA_541	35.12	12.68	4.5	2.09	5.5	5.39	10.15	10.09	0.72	3.25	29.01	13.62	1.81	21.97	5.88	109.8	10.7942		CGGA_1207	38	7.83	2.98	2.71	2.86	4.91	12.73	59.06	0.99	1.35	18.41
TCGA-FG-8189-01	11.1062	11.5029	10.6897	7.862	9.2271	7.6556	8.7607	9.8538	2.9708	8.0843	11.371	8.6004	3.2029	8.4144	7.2033	12.5094	10.1579		CGGA_564	52.96	115.94	3.84	1.79	6.62	13.04	22.68	31.94	3.44	8	11.76	79.12	3.06	69.91	7.11	201.18	44.8743		CGGA_1211	48.99	80.58	3.71	0.43	1.66	2.89	18.11	30.12	2.41	7.88	16.75
TCGA-HT-7873-01	11.3272	13.9989	11.0099	5.1566	8.1476	8.8182	10.5944	10.3437	3.0913	8.9181	8.7907	9.7595	4.1965	7.1593	7.3274	12.8536	10.1688		CGGA_565	50.64	53.07	7.3	1.13	4.91	10.77	13.8	16.85	0.47	5.01	49.5	23.84	0.89	28.51	6.54	85.84	19.9934		CGGA_1212	66.91	41.75	7.88	0.5	1.54	5.71	20.53	26.1	0.89	8.92	11.35
TCGA-CS-4938-01	10.9179	12.9526	10.5516	4.0464	8.0765	8.5977	10.2081	10.2279	3.2943	9.3848	8.467	9.7875	3.7641	5.2289	6.7434	13.33	9.5346		CGGA_578	57.77	97.24	10.1	0.53	1.17	4.81	14.7	17.73	1.69	8.77	15.22	61.91	2.81	71.69	4.08	114.79	35.8188		CGGA_1223	167.38	54.66	2.56	0.93	4.34	5.65	36.18	26.91	6.25	7.46	19.92
TCGA-KT-A74X-01	11.8295	11.4357	10.6612	4.6986	6.4774	7.5466	10.1581	10.724	4.2321	8.1467	8.8406	10.2673	5.8819	7.7679	6.2241	13.3846	9.7919		CGGA_599	59.26	95.45	4.1	0.56	2.36	12.49	21.26	20.52	1.39	7.8	8.15	49.86	2.86	25.91	2.64	159.62	18.5173		CGGA_1226	37.89	116.88	3.58	2.64	2.96	10.29	23.73	32.56	2.33	4.6	13.62
TCGA-P5-A5EX-01	11.0271	15.3662	10.4211	7.9926	8.6183	9.7098	10.1369	11.1802	4.5195	10.4892	9.4206	10.3804	8.3199	11.0607	8.3134	14.1467	12.5863		CGGA_604	92.71	217.69	5.79	11.44	9.5	30.31	25.9	33.13	3.51	16.88	24.55	75.16	5.73	472.61	20.71	371.54	173.176		CGGA_1228	55.73	16.96	3.84	2.4	3.92	5.84	17.44	63.01	2.41	3.85	33.11
TCGA-S9-A6U5-01	11.5623	11.168	10.9142	6.2338	7.5573	8.4683	10.0941	10.5391	5.1192	8.9638	8.9192	10.011	7.6111	7.6781	6.8708	12.9882	10.1962		CGGA_616	80	868.9	5.37	2.13	5.11	11.11	21.31	16.58	5.97	14.76	16.01	40.98	2.84	486.7	9.34	288.08	228.763		CGGA_1232	88.95	21.27	2.14	5.62	3.74	13.41	35.34	18.32	3.49	8.24	12.86
TCGA-HT-7476-01	11.6217	12.4093	10.148	7.0464	7.7406	8.3065	9.9672	10.2532	4.5911	8.7076	10.7925	9.9311	4.7978	9.4458	7.7898	12.9313	10.9965		CGGA_633	57.87	26.81	12.86	3.1	4.02	3.81	21.24	12.74	1.43	6.29	34.95	16.83	1.72	43.11	8.37	160.66	16.3757		CGGA_1235	74.93	28.32	3.73	1.74	5.72	13.9	27.81	36.23	1.3	5.95	10.77
TCGA-QH-A6X9-01	11.7428	12.5762	10.7042	5.0529	7.0155	7.9555	10.3125	10.248	3.6469	9.1451	10.1428	10.0146	3.4511	6.7431	6.6261	12.5286	10.0265		CGGA_638	53.4	14.76	8.63	1.06	3.88	12.75	17.39	12.93	1.45	6.22	13.41	33.61	5.05	5.01	3.52	120.77	2.84013		CGGA_1236	39.25	20.66	3.08	1.1	4	15.49	20.65	29.25	0.36	5.89	10.7
TCGA-HT-8563-01	11.4348	14.5767	9.9623	9.614	10.0717	10.9021	10.5584	10.1	5.7772	10.3663	9.8509	9.8869	8.119	8.6545	9.0048	13.8203	11.7324		CGGA_643	39.85	7.63	3.98	1.07	5.09	6.79	19.51	1262.88	3.88	7.44	34.98	107.42	1.85	310.67	8.48	232.02	210.459		CGGA_1238	76.23	53.44	5.65	5.35	7.85	13.48	31.97	46.67	5.75	8.14	19.46
TCGA-FG-A70Y-01	11.6789	13.3164	10.54	5.7928	8.3706	9.4214	9.8948	10.3218	3.466	8.7405	8.7932	9.5623	4.1834	8.165	8.1244	12.6508	10.1365		CGGA_658	72.58	136.01	5.88	3.82	5.36	15.99	22.02	32.8	0.97	9.43	19.07	63.67	5.46	200.1	5.97	219.75	79.4788		CGGA_1239	67.8	10.78	6.27	0.31	2.67	5.47	25.08	48.44	2.19	5.18	8.98
TCGA-S9-A7IS-01	12.0809	11.7296	10.7593	6.0069	7.3278	9.6595	9.8243	10.7795	3.6224	8.9232	10.3674	11.2454	4.3411	11.9074	6.2172	14.1734	11.8232		CGGA_659	37.2	14.46	4.99	2.49	6.39	4.23	7.85	12.23	0.58	3.29	28.48	13.73	0.83	24.6	3.89	100.57	10.5705		CGGA_1256	52.17	12.06	1.52	1.9	3.6	4.96	21.96	169.06	4.48	1.6	6.55
TCGA-E1-A7YO-01	11.3796	11.7166	12.0374	5.0628	7.3793	7.0067	9.8037	10.5928	3.4175	8.7654	9.6374	9.524	2.1272	8.573	6.7822	12.3326	10.1905		CGGA_676	93.99	53.24	7.32	1.86	5.53	14.99	25	24.59	0.82	9.67	24.67	83.36	3.55	219.89	7.01	231.48	75.9172		CGGA_1264	85.74	12.66	5.05	0.44	3.55	9.33	24.16	37.36	1.51	5.3	9.44
TCGA-QH-A6X5-01	11.59	11.1066	10.8588	4.7473	6.4929	8.3366	10.0225	10.8015	4.7978	8.9917	8.7026	10.0988	4.584	7.057	5.4626	13.3342	9.76504		CGGA_679	111.25	213.28	3.01	2.51	10.92	24.42	30.89	21.24	4.48	11.59	19.58	103.81	11.62	211.3	7.81	245.19	87.7327		CGGA_1269	88.32	24.13	9.54	0.44	1.94	2.6	21.06	25	1.86	3.52	16.22
TCGA-DB-A4XG-01	11.5838	11.8466	11.0525	4.3557	6.1194	6.2752	9.8328	10.3853	3.7678	8.998	9.4465	9.9357	1.487	7.5109	5.6029	12.8296	9.7478		CGGA_680	44.67	18.63	4.38	0.93	2.07	9.7	11.81	118.99	0.86	5.25	39.46	59.48	3.44	34.76	2.98	172.09	33.3668		CGGA_1282	82.05	18.93	1.87	0.76	2.16	3.57	34.26	1337.92	20.78	6.96	9.93
TCGA-VM-A8CA-01	11.3344	12.2218	10.847	6.4715	8.2437	8.5814	9.7641	10.2294	4.6043	8.5303	9.1441	10.1084	5.8902	10.6275	7.9189	13.4972	11.1121		CGGA_700	60.09	33.16	11.66	0.74	3.18	6.44	22.55	15.67	0.41	7.37	9.22	33.75	2.3	13.3	1.76	198.6	5.43895		CGGA_1286	49.78	3.73	2.75	0.44	0.74	8.88	19.01	52.41	1.84	1.84	4.64
TCGA-HT-7855-01	11.4448	12.7717	11.7643	4.9338	7.3175	8.3049	9.8743	10.1314	2.4933	9.0728	8.5806	9.6309	3.789	8.032	6.9108	12.4768	10.0442		CGGA_727	41.11	31.43	4.12	1.04	4.19	10.93	26.55	36.19	3.18	8.16	17.47	60.37	1.91	79.94	6.06	195.78	42.2566		CGGA_1291	23.17	5	3.57	2.89	1.62	2.41	10.55	38.03	2	0.58	5.05
TCGA-S9-A89Z-01	11.853	13.2388	10.7511	8.0453	8.2012	9.6396	10.6721	10.4319	5.0881	9.8031	9.1326	10.6581	6.5296	10.163	8.0189	13.3275	11.5987		CGGA_731	75.04	386.24	4.9	4.07	4.73	13	23.53	18.96	3.08	12.9	21.88	42.19	2.87	388.98	12.97	234.04	156.457		CGGA_1300	54.5	46.99	6.4	1.53	3.05	12.99	21.37	28.11	1.52	6.13	10.46
TCGA-DU-8166-01	11.5053	12.908	11.2715	6.4994	7.4397	8.7234	9.8023	10.275	4.6135	9.8836	9.6334	8.5351	4.5756	8.5064	6.7021	13.0251	10.5387		CGGA_766	66.26	25.3	6.25	0.54	0.87	2.95	18.92	19.73	0.15	5.13	13.22	49.77	0.45	9.33	2.9	139.15	3.62993		CGGA_1303	15.43	8.05	9.82	0.85	2.29	2.73	5.66	4.26	0.12	6.72	12.66
TCGA-DH-A7UT-01	11.6288	12.6817	10.7993	6.5369	8.3058	9.483	10.4334	10.1595	3.5108	9.0753	8.6997	9.5853	4.8152	8.6236	7.2568	12.6799	10.4269		CGGA_782	53.12	255.26	2.87	5.2	4.36	13.59	24.93	28.62	1.16	10.45	24.57	47.52	3.45	114.96	18.02	269.15	69.5829		CGGA_1305	73.84	6.17	2.43	1.26	3.21	9.36	20.58	30.46	2.7	2.72	6.05
TCGA-HT-A616-01	11.4701	11.9786	10.4757	6.6313	7.1831	7.0893	9.3442	10.0378	3.342	8.6876	10.6234	9.1143	2.6534	8.5256	6.6453	12.8823	10.17		CGGA_789	50.46	192.79	3.74	8.75	8.76	28.43	20.5	12.67	2.42	8.24	50.35	25.94	9.3	189.84	21.15	233.75	88.2019		CGGA_1309	31.38	4.34	1.77	0.54	0.73	1.4	9.7	46.42	0.88	0.73	3.52
TCGA-HT-7611-01	11.5367	13.4151	10.7986	6.0943	8.4177	8.9973	10.3056	10.1425	3.4084	9.5223	8.6911	9.8686	4.1246	6.6788	6.886	13.48	10.0148		CGGA_791	37.45	93.25	3.35	1.63	3.07	9.82	20.75	16.94	2.56	8.91	25.29	60.21	2.77	121.26	3.56	147.02	61.2127		CGGA_1317	18.47	6.99	8.53	0.54	1.4	1.15	10.15	5.77	0.23	4.87	11.24
TCGA-HT-8018-01	11.3255	12.9612	10.7235	8.1908	8.8117	9.0038	9.5287	9.6481	4.2525	8.9148	11.0805	9.23	6.7133	9.1859	8.5841	12.9141	11.1214		CGGA_796	45.35	132.6	5.2	1.52	2.66	10.93	28.39	28.5	1.86	6.12	12.64	27.35	1.27	146.97	5.24	165.06	61.7402		CGGA_1318	70.01	34.56	5.74	7.26	7.12	20.82	45.3	54.29	4.37	3.28	7.73
TCGA-FG-A60K-01	11.5522	10.7995	11.2281	6.645	6.4769	7.9729	10.1708	11.0884	4.7227	9.3016	8.8652	9.6446	3.9445	6.3098	6.5241	13.3229	9.56542		CGGA_802	74.95	179.57	7.8	4.3	6.63	11.29	21.38	204.84	4.86	17.23	19.39	40.06	3	306.41	10.49	469.21	126.835		CGGA_1319	41.93	2.6	2.86	1.6	2.19	3.43	18.68	32.87	2.92	1.61	4.96
TCGA-HT-7856-01	11.3278	12.678	10.8106	7.2739	9.1287	8.4802	9.529	10.0458	2.4887	8.3759	10.7746	9.5999	2.8988	8.1162	7.5402	12.6655	10.398		CGGA_804	52.7	52.98	3.68	4.54	5.12	24.72	22	28.07	1.34	7.98	7.31	52.06	4.91	37.58	4.86	173.45	22.4688		CGGA_1321	75.34	18.42	6.89	2.52	2.43	5.74	40.54	31.68	1.82	7.12	17.95
TCGA-DU-5851-01	11.285	11.9784	10.6957	6.5144	8.4506	9.3903	9.6768	10.2406	2.1289	8.9172	11.0604	9.2211	3.6405	8.1603	7.1738	13.0897	10.5791		CGGA_807	36.78	20.9	4.4	1.53	4.18	6.35	7.52	13.67	0.3	3.17	44.39	14.19	0.72	16.61	2.75	112.96	12.9624		CGGA_1326	64.26	21.42	1.97	1.92	3.68	9.39	16.82	2606.76	7.18	3.09	10.23
TCGA-DU-A7T6-01	11.993	10.9179	9.684	6.1801	7.1523	8.7611	9.8896	11.0666	4.2216	9.0332	9.8882	11.067	5.0857	9.1258	6.7446	13.3717	10.766		CGGA_808	50.19	56.14	6.4	1.48	4.94	26.53	18.95	38.23	0.86	6.17	9.61	38.87	4.24	40.77	4.05	195	22.5297		CGGA_1334	94.67	22.4	3.46	2	5.56	8.11	24.11	28.7	2.8	4.31	11.46
TCGA-S9-A6TY-01	11.3299	10.5376	10.0541	5.1834	6.561	7.0151	10.3595	10.4069	3.055	8.6137	9.5546	9.8521	2.9067	7.2295	6.0618	12.7768	9.6985		CGGA_837	96.81	564.3	6.78	1.19	2.81	5.66	16.62	45.23	3.03	11.97	22.16	50.35	2.67	849.54	4.28	296.22	310.01		CGGA_1335	55.35	13.59	3.28	0.95	2.02	4.27	14.16	38.8	1.76	2.55	18.15
TCGA-DU-7015-01	11.4128	11.9696	10.9143	7.4619	8.8501	9.8829	10.129	10.2867	3.3476	9.5726	8.874	10.2363	6.218	7.0941	7.3194	13.4656	10.3488		CGGA_842	66.49	608.14	8.11	3.4	8.71	13.39	22.94	50.45	6.24	19.8	22.65	61.7	2.69	666.26	17.26	391.58	275.644		CGGA_1339	71.12	13.4	4.95	0.51	1.49	7.97	18.19	19.98	0.51	7.21	9.57
TCGA-DB-A4XC-01	11.6093	12.2992	10.8456	6.6609	8.1867	9.0724	10.0624	10.3347	4.7637	9.4094	9.9004	9.9782	4.0836	7.104	7.3775	12.4897	10.312		CGGA_848	100.86	456.55	3.56	1.63	3.51	9.26	20.47	25.23	4.65	10.25	15.18	137.33	2.42	685.4	8.99	467.16	265.037		CGGA_1345	41.64	6.4	1.95	3.07	3.01	10.2	19.7	97.1	8.49	3.85	4.4
TCGA-TM-A84O-01	11.5626	11.6799	11.2316	7.449	7.8132	8.3773	10.1416	10.7786	3.0524	8.807	9.0621	9.9474	5.455	6.3363	6.8625	13.4148	9.70774		CGGA_850	103.44	1111.74	3.9	1.15	3.5	8.16	20.42	24.74	2.23	9.76	21.99	84.87	2.03	1137.3	7.75	280.29	453.299		CGGA_135	128.36	307.49	6.57	13.2	10.57	26.43	30.73	37.62	10.42	17.4	27.96
TCGA-TM-A84F-01	11.6213	12.7153	10.1973	9.1284	9.576	10.1285	10.1758	10.282	6.4211	9.2679	9.0646	9.8586	7.9647	6.8341	8.3607	12.9065	10.3539		CGGA_859	68.68	275.66	4.4	4.06	6.95	17.69	20.27	881.55	3.35	14.49	18.85	51.52	12.91	1109.01	11.84	343.46	433.773		CGGA_1350	20.32	4.22	7.86	0.34	1.2	2.34	7.3	5.96	0.04	2.19	3.89
TCGA-S9-A6TU-01	11.8741	12.7421	10.9104	6.2085	8.475	9.536	10.2435	10.0508	4.1742	9.34	8.9321	9.7739	4.8074	7.7804	8.2147	12.8052	10.243		CGGA_871	62.67	23.23	11.02	1.25	3.12	5.39	20.84	22.41	0.38	5.69	11.43	20.35	2.3	5.36	3.18	118.31	-2.18794		CGGA_1353	74.22	175.83	4.38	2.13	4.27	11.08	36.13	28.17	4.13	9.35	15.02
TCGA-HT-A61A-01	11.0843	11.2494	10.4053	7.4128	8.8158	8.1156	9.108	10.074	4.2035	8.2819	10.725	8.9921	3.4168	7.1677	7.1918	12.7086	9.85311		CGGA_876	79.3	168.99	8.64	15.85	13.09	49.35	26.92	60.67	4.25	13.94	22.55	44.07	13.36	406.06	29.25	335.27	148.603		CGGA_1354	93.65	87.5	2.32	1.22	2.34	10.17	27.51	30.18	5.75	7.13	22.08
TCGA-S9-A7IQ-01	11.3407	11.2533	10.5767	7.3368	8.8839	7.5587	9.058	9.6984	3.6522	8.1507	10.4837	8.8438	2.5273	8.8556	7.3787	12.7226	10.0449		CGGA_878	134.15	360.96	4.05	0.44	4.14	14.12	14.52	28.9	9.5	12.01	25.55	121.29	2.55	1097.57	7.46	307.22	369.571		CGGA_1361	60.82	50.55	6.14	0.91	2.03	4.35	10.02	11.94	1.5	4.55	27.5
TCGA-HT-7884-01	11.6499	12.2608	11.2891	4.9304	7.2318	8.2091	10.2796	10.2869	3.0658	9.2562	9.1931	9.3234	3.977	7.2032	5.8056	12.5136	9.87249		CGGA_902	95.37	101.55	2.64	2.39	4.38	12.77	17.22	1691.63	2.98	10.41	35.69	279.85	4.83	290.47	6.67	239.82	261.035		CGGA_1362	42.89	45.82	7.08	3.02	3.21	11.6	20.24	36.4	2.78	5.16	41.5
TCGA-IK-8125-01	11.2928	11.5336	11.057	6.2539	7.7538	7.6688	9.9544	10.6754	3.7714	8.6509	9.7729	9.9744	4.3318	7.3299	7.083	12.6495	10.0898		CGGA_D03	115.17	175.93	4.71	1.71	2.65	9.91	28.57	151.39	5.5	15.7	50.3	69.69	2.23	399.59	7.18	350.34	150.562		CGGA_1365	16.46	18.98	7.17	1.93	1.23	2.18	3.71	3.14	0.15	1.62	5.13
TCGA-WH-A86K-01	12.0556	13.7429	10.4746	6.3061	7.8752	8.7055	10.1207	9.987	4.2501	8.7465	9.0478	9.8368	5.2577	8.3197	7.4925	12.6526	10.2419		CGGA_D09	51.97	622.49	3.96	1.58	5.66	7.23	22.32	29.61	2.97	7.82	25.92	51.93	2.56	783.02	11.63	173.81	309.267		CGGA_1368	22.57	2.91	8.35	0.22	0.65	1.92	6.33	3.7	0	2.37	6.43
TCGA-DB-A75M-01	12.0404	11.9215	10.8204	5.9535	7.9254	8.7468	10.3053	9.813	3.0216	9.2353	8.6763	9.248	4.6711	7.5229	7.4623	13.2484	9.71644		CGGA_D11	79.65	30.85	6.92	1.44	6.15	10.24	20.92	33.06	9.63	11.11	40.38	84.05	6.26	416.27	13.52	242	143.747		CGGA_1369	45.91	3.79	2.29	0.75	1.54	7.62	14.91	50.45	0.96	2.36	5.04
TCGA-HT-A5R5-01	11.6168	12.1267	10.453	7.3946	8.0201	9.7626	9.6455	9.5598	5.7508	10.0059	10.2516	9.3881	5.0361	6.6516	7.838	12.8903	10.2521		CGGA_D16	59.41	21.1	4.78	12.61	10.37	29.77	21.29	37.88	1.74	12.27	17.97	46.65	3.78	161.92	14.52	230.18	59.7514		CGGA_1371	46.36	206.55	0.98	2.01	2.51	5.26	25.48	97.47	11.34	3.61	7.46
TCGA-HT-A618-01	11.5534	11.7425	9.7693	9.1247	9.3779	10.178	10.3824	9.9313	3.7469	9.2352	8.816	10.017	6.7619	8.6713	8.0304	12.6944	10.6719		CGGA_D35	60.91	120.31	7.63	7.84	5.43	21.91	19.92	71.07	10.83	13.58	29.55	61.58	6.63	577.42	14.75	333.3	205.824		CGGA_1377	67.02	18.68	8.46	0.58	4.26	7.21	25.89	21.68	0.64	4.65	7.01
TCGA-FG-6691-01	11.4659	13.4513	10.7067	5.9924	8.6987	9.8553	10.1273	10.5515	3.4333	9.2271	9.1295	9.8656	4.5913	7.6752	7.8253	13.1018	10.4594		CGGA_D37	58.98	160.64	7.47	6.59	6.74	15.49	24.03	25.53	4.13	13.75	17.76	57.2	22.51	242.56	24.27	347.43	101.046		CGGA_1378	16.49	11.01	3.29	1.56	1.46	3.53	7.87	31.84	0.13	2.03	5.56
TCGA-HT-7467-01	11.2251	11.2706	10.7041	5.8797	7.8256	8.9926	9.4082	10.3047	3.3574	8.5397	9.4051	9.7345	4.0193	8.1229	6.8784	12.6612	10.094		CGGA_D44	76.45	225.34	11.02	0.73	2.26	3.15	19.54	16.46	2.07	14.15	26.98	57.2	1.35	293.63	5.83	133.87	113.812		CGGA_1380	86.45	66.8	2.79	9.93	9.51	17.9	28.86	16.74	3.33	5.12	27.88
TCGA-S9-A7R3-01	10.9539	12.6037	10.9734	4.6186	7.7254	8.4677	10.2205	10.5061	4.0628	9.4525	8.6356	9.9475	4.4984	6.9852	7.3048	13.1351	10.2036		CGGA_D57	86.12	227.9	3.85	2.07	4.06	8.73	14.33	25.43	8.01	9.04	19.23	50.03	5.22	217.97	8.5	249.63	84.1414		CGGA_1382	49.18	93.43	6.25	0.99	3.54	6.05	28.95	16.81	1.95	12.1	21.5
TCGA-FG-A4MX-01	11.9516	12.4567	10.6496	7.6278	7.7133	8.2726	10.2406	9.2054	4.2534	7.3981	8.5718	9.2981	5.2151	8.5254	6.9944	12.2283	9.59998		CGGA_342	70.1	18.6	1.83	1.7	2.19	13.88	16.53	48.19	2.84	9.6	15.76	79.24	2	207.68	7.03	259.25	74.2555		CGGA_1386	32.15	2.48	1.52	1.38	1.77	4.89	13.48	33.79	0.56	0.6	3.02
TCGA-HT-7681-01	11.4563	11.7086	10.4245	6.4099	7.9809	8.2105	9.5781	10.1144	4.6947	8.3952	9.4157	9.5216	6.3002	8.2212	6.8035	13.0358	10.1176		CGGA_J030	54.86	46.1	9.23	0.55	2.96	4.45	19.01	10.83	1.55	6.56	18.68	32.22	0.32	4.54	2.29	130.79	5.64835		CGGA_1389	41.62	3.13	3.69	0.94	1.79	3.18	14.9	45.96	1.64	2.08	9.23
TCGA-S9-A7IZ-01	10.7735	13.2132	10.9493	6.62	7.8212	8.7394	10.0275	9.7868	4.782	9.1862	10.1138	9.8493	4.7591	7.2001	7.3915	12.4548	10.6429		CGGA_1005	66.25	29.74	9.27	0.64	2.25	4.54	16.18	9.66	0.29	5.06	27.06	29.97	1.14	6.32	2.04	108.17	1.16043		CGGA_139	45.67	29.27	4.97	1.6	5.89	3.89	12.6	9.17	0.77	3.09	64.45
TCGA-DU-A6S7-01	11.886	11.0779	10.63	5.6053	7.7969	9.1532	10.8281	10.265	4.1378	9.1467	8.6634	9.8457	3.3738	6.9937	8.0657	13.1279	9.72613		CGGA_1013	66.82	40.3	6.27	0.38	2.15	5.81	20.75	15.2	0.31	7.14	5.93	30.33	1.26	11.61	3.32	145.56	0.523596		CGGA_1391	49.78	176.39	1.8	1.68	2.53	5.92	37.47	63.34	4.9	6.36	13.22
TCGA-P5-A72Z-01	11.9608	5.9446	11.301	3.8158	6.6706	6.631	10.3934	10.1397	2.1514	9.3856	9.2567	9.5882	3.7059	6.6058	5.3059	13.681	8.94656		CGGA_1020	56.89	36.86	7.34	0.75	3.42	10.16	20.07	17.87	0.39	7.92	15.32	23.99	0.77	6.06	5.11	121.12	3.23182		CGGA_1392	26.25	40.99	0.57	3.34	3.63	9.14	20.83	96.66	11.1	2.3	6.15
TCGA-HT-8114-01	11.5924	13.3164	10.9963	5.9631	8.5386	9.7099	10.2523	10.1086	3.9841	9.3169	9.2053	9.5204	5.6403	9.4098	7.7577	12.6398	10.9534		CGGA_1027	43.27	34.89	4.75	1.65	2.72	5.79	12.73	22.24	0.2	8.11	21.66	36.67	3.88	41.64	2.27	257.51	23.1293		CGGA_1401	83.19	20.4	7.1	0.57	3.69	5.95	18.93	14.46	0.52	8.02	16.28
TCGA-HW-8321-01	11.5971	13.3047	11.3138	5.6401	6.9839	8.3019	10.1947	10.2985	3.3309	9.5337	9.5134	9.4272	4.8658	7.8625	6.2186	12.8145	10.4072		CGGA_1031	65.75	31.15	6.78	0.44	4.08	8.08	17.82	9.22	0.98	6.09	13.15	27.05	0.63	6.04	5.26	165.08	-1.37114		CGGA_1402	104	164.51	1.77	4.79	5.67	19.28	33.21	40.94	5.4	9.81	18.61
TCGA-DH-5141-01	11.6385	13.0061	10.9312	4.3878	6.308	8.2611	8.9287	10.7357	2.6475	8.6576	9.1559	10.0894	4.1333	8.0148	6.5298	12.9336	9.96874		CGGA_1046	59.35	142.05	10.67	0.72	3.75	6.44	11.95	6.27	0.28	6.01	28.55	19	0.21	6.22	2.67	122.73	11.7084		CGGA_1403	54.71	49.53	10.66	1.38	4.08	15.01	23.35	379.23	0.68	14.66	19.7
TCGA-EZ-7264-01	10.9593	10.5255	11.4378	3.5394	5.9534	6.3144	10.1169	10.6064	1.4212	8.3186	9.1466	9.6949	3.2311	6.4863	5.1794	13.2459	9.31298		CGGA_1113	60.31	68.09	3.55	0.59	1.89	5.14	16.56	33.81	0.84	7.9	25.59	55.52	1.42	60.79	3.61	226.34	32.0211		CGGA_1404	49.09	12.12	2.38	0.99	1.54	4.54	16.39	39.73	1.27	3.76	9.39
TCGA-P5-A5F4-01	11.6489	11.5265	10.7303	6.7049	8.289	7.9338	9.4345	9.9447	3.2005	8.4479	10.8827	9.8632	3.7322	8.5756	7.5656	12.5568	10.3891		CGGA_1146	56.64	46.77	8.73	1.37	2.72	9.49	22.95	16.98	1.51	8.57	8.71	54.76	2.31	11.36	8.17	219.6	12.3443		CGGA_1407	35.98	14.9	0.82	1.67	1.89	4.45	13.83	51.53	0.27	0.65	3.76
TCGA-HT-8012-01	11.6299	11.8415	11.0609	5.1319	7.5147	7.5915	9.9605	10.3998	3.1898	8.8748	9.7095	9.2712	4.3264	7.6711	7.1364	12.6127	9.94358		CGGA_1160	44.43	180.66	5	1.04	2.05	9.31	18.23	39.02	1.46	10.6	20.42	58.9	5.09	1165.2	4.07	423.45	391.81		CGGA_1410	68.97	32.98	11.07	1.03	3.14	9.36	36.49	21.61	0.89	11.05	26.13
TCGA-FG-8191-01	11.379	13.0524	10.5194	6.7628	6.8654	8.6071	9.6845	10.4026	3.4826	10.0815	9.1144	9.5128	5.2231	7.2974	7.0429	13.7392	10.2954		CGGA_1189	70.32	28.14	9.5	0.24	1.08	3.41	21.02	13.15	0.82	6.62	12.62	36.6	0.79	3.26	2.98	181.06	-1.41099		CGGA_1413	51.45	22.81	11.63	0.89	3.34	2.64	15.27	21.63	0.52	4.5	26.74
TCGA-DH-5142-01	11.6697	12.2189	10.1815	9.2443	8.9026	10.555	10.1647	10.0832	4.4366	9.5715	8.8739	10.5459	6.6322	6.9181	7.811	12.6741	10.3619		CGGA_1190	70.26	10.62	11	0.78	4.4	3.65	26.16	14.79	0.99	5.94	22.66	64.59	1.33	11.44	3.73	166.87	8.61242		CGGA_1416	49.67	3.89	1.87	0.67	1.25	2.6	9.51	64.08	1.68	2.3	6.67
TCGA-DU-A6S8-01	11.2307	9.8083	11.4109	4.8395	6.9823	7.2173	10.1643	10.6176	1.6749	8.1358	9.3319	10.1308	3.08	6.6892	5.9937	13.501	9.41635		CGGA_1219	70.56	15.82	5.66	1.82	2.67	14.83	34.78	56.45	1.52	5.76	9.63	24.68	4.37	37.15	5.22	119.9	9.86231		CGGA_1417	58.51	27.9	13.31	0.87	1.41	2.14	15.85	21.46	0.95	3.89	29.96
TCGA-E1-A7YW-01	11.7253	12.9733	11.5906	6.3387	8.0779	9.0604	10.2077	10.4572	2.9802	9.5433	9.0924	9.8035	4.0144	6.7181	7.1171	12.687	10.0197		CGGA_1287	52.64	69.73	2.46	0.71	2.04	10.64	18.25	24.72	0.33	8.93	7.29	64.82	1.64	35.15	2.6	220.1	24.5621		CGGA_1418	16.44	75.23	3.85	1.34	1.02	4.64	6.66	4.82	0.32	3.04	4.94
TCGA-CS-6666-01	11.4057	11.5575	11.6341	5.7422	7.5542	8.4869	9.9458	10.2845	2.2396	9.5924	8.793	10.1783	5.5	8.5051	7.0501	13.3998	10.5111		CGGA_1307	71.19	91.5	3.28	2.76	2.94	10.66	23.19	14.94	1.03	10.37	13.03	90.03	2.34	161.99	3.94	233.31	66.7257		CGGA_1420	55.69	9.5	1.98	2.17	6.89	6.31	13.87	6.65	2.24	2.76	32.62
TCGA-DU-7298-01	10.8454	14.0435	10.3705	5.1694	8.1998	9.2418	9.8113	10.8665	1.6045	9.0304	9.8555	10.8296	4.3184	8.6147	6.6118	12.7886	11.1714		CGGA_1314	77.93	51.52	2.46	2.14	2.96	15.59	22.56	27.01	2.52	7.81	15.1	180.7	3.59	127.78	4.51	339.34	71.0796		CGGA_1421	26.76	1.91	1.45	4.09	2.31	7.47	9.91	39.98	0.98	1.09	5.31
TCGA-DB-A64R-01	11.6613	11.0244	11.4285	6.3388	6.6829	6.4942	10.0334	10.5707	3.6021	8.9319	9.1308	9.3735	3.8157	6.9993	5.8622	12.8832	9.49035		CGGA_1322	77.81	5.43	9.08	0.48	1.75	4.85	21.51	25.85	0.74	5.82	14.03	53.97	0.97	6.7	4.17	219.25	0.166493		CGGA_1422	25.14	26.16	2.07	1.34	0.66	2.69	4.72	6.23	0.41	3.36	4.31
TCGA-FG-A60L-01	11.5552	10.6378	10.3772	7.6111	7.9008	9.6151	9.9887	9.8669	4.7197	8.4262	7.8171	10.188	5.7206	8.0176	8.4982	13.4724	9.80888		CGGA_1330	51.03	22.67	3.08	4.07	1.69	12.57	17.8	21.38	1.48	4.81	11.76	62.24	1.66	61.4	3.35	331.62	29.3091		CGGA_1424	16.54	2.83	4.28	0.14	0.35	1.44	2.35	2.09	0.04	2.1	2.64
TCGA-DU-7010-01	11.2836	12.794	10.851	7.1984	7.2161	9.0038	10.1126	10.6043	2.8131	8.5085	9.3292	11.344	4.3848	10.9409	6.8062	13.5923	11.5432		CGGA_1384	64.36	131.49	6.13	0.83	3.5	7.34	17.39	12.13	0.51	8.55	20.38	43.88	0.94	39.55	2.22	162.14	24.7197		CGGA_1425	68.9	41.92	2.51	1.32	1.65	3.29	38.43	95.07	4.9	2.09	13.03
TCGA-S9-A6WP-01	11.1764	11.3552	10.7478	4.8504	7.5433	8.6385	10.0074	10.8531	4.5834	8.4675	9.1977	10.1662	5.9522	7.4995	7.4167	12.7234	10.1707		CGGA_1406	55.16	76.17	5.49	9.45	8.67	28.39	28.05	15.17	1.29	9.93	14.83	66.87	3.37	21.6	10.32	221.61	25.2024		CGGA_1426	79.59	223.89	8.77	2.2	6.41	7.49	20.52	27.83	2.28	6.23	27.32
TCGA-DB-5280-01	11.5744	13.0362	10.9892	3.8763	7.5947	7.9907	10.1194	10.1275	3.4363	9.0037	8.8662	9.5739	3.4363	6.7028	6.9022	13.0446	9.6558		CGGA_1409	75.16	39.49	8.18	0.57	1.75	5.02	22.77	13.08	1.42	6.49	31	47.68	0.92	9.77	1.58	107.25	6.37195		CGGA_1427	50.36	9.5	2.96	2.5	4.09	9.68	23.7	60.48	1.64	2.04	8.37
TCGA-TM-A84T-01	11.8519	12.4499	11.0867	4.9168	7.9331	8.9274	10.0516	10.3789	3.4243	8.8011	8.6742	9.39	3.9422	6.9898	7.2667	12.5851	9.56794		CGGA_236	102.12	23.87	8.22	0.21	1.7	3.04	24.02	24.87	0.34	7.4	15.06	38.07	0.76	55.04	3.46	198.84	5.71954		CGGA_1431	45.23	12.22	3.11	1.18	1.77	6.56	15.33	32.98	2.45	3.69	8.97
TCGA-DH-A66D-01	11.9302	12.2046	11.5746	7.2056	8.8226	9.7031	10.2093	10.0964	4.3699	9.3729	9.3329	9.9937	5.4913	7.2056	7.5702	12.7768	10.2378		CGGA_241	47.94	33.51	6.06	1.67	4.45	3.9	10.3	7.93	1.36	4.71	34.86	14.06	2.21	26.93	5.06	99.15	11.4726		CGGA_1433	97.35	41.23	2.04	2.89	2.51	15.97	29.81	39.46	5.47	8.56	17.29
TCGA-DB-5278-01	11.4711	11.5629	10.8853	5.4921	7.6165	7.8022	9.9466	10.4454	3.9603	8.7259	9.0824	9.2628	3.8714	7.9397	6.4506	13.1978	9.88335		CGGA_251	42.16	37.31	5.68	1.71	2.83	5.5	15.57	16.7	1.06	7.57	15.23	34.24	1.73	8.56	3.61	164.07	10.4443		CGGA_1435	70.44	14.67	6.02	4.53	2.44	13.25	18.9	11.23	1.77	7.22	18.09
TCGA-FG-8188-01	11.5041	11.9083	10.4602	5.3429	7.5549	8.7955	10.2358	10.419	4.0302	9.079	8.5144	9.7802	4.5402	6.985	7.6574	12.989	9.79065		CGGA_252	42.2	49.91	9.75	0.48	1.89	7.95	19.22	20.07	0.51	8.12	15.71	56.31	1.19	4.58	4.67	217.23	16.8331		CGGA_1440	66.82	9.85	4.34	0.8	2.3	4.89	22.93	21.4	0.68	5.37	15.73
TCGA-HT-7881-01	11.1124	11.5623	10.5193	6.124	7.3536	8.0321	9.405	10.0019	2.8269	8.558	10.3254	9.25	3.6059	6.6225	6.3444	13.0092	9.6901		CGGA_254	53.42	14.52	7.21	0.22	1.92	9.76	15.03	17.24	0.44	8.15	9.87	27.28	0.56	3.98	1.68	140.94	0.365105		CGGA_1441	62.04	50.49	1.34	6.39	2.87	16.69	25.73	41.83	13.28	6.57	12.11
TCGA-DB-A64X-01	11.8468	11.9299	10.7177	6.0457	6.889	7.6527	9.5163	10.0376	4.7934	8.5555	8.8374	9.819	3.4708	7.4922	7.2839	12.9457	9.53973		CGGA_256	56.37	57.24	7.94	0.98	4.23	8.9	17.34	12.49	0.29	10.71	10.9	31.11	1.14	16.89	3.57	137.6	9.0977		CGGA_1444	60.18	170.35	1.71	1.25	4.13	10.7	27	27.63	1.97	6.38	16.43
TCGA-FG-7637-01	11.7073	12.9965	11.0428	5.1743	5.7695	6.9383	9.7374	10.6064	2.1847	9.0021	9.4343	9.8696	4.9934	8.4005	6.1897	12.8325	10.2303		CGGA_261	63.04	24.37	5.52	0.67	3.81	8.52	15.41	10.97	0.36	4.86	13.45	21.43	1	8.44	3.37	124.47	-2.43791		CGGA_1446	11.8	1.71	3.27	0.16	0.4	0.76	3.96	4.03	0.12	2.12	2.74
TCGA-VM-A8CE-01	11.7251	11.2739	10.9846	5.7614	6.7372	8.5426	10.06	10.5296	3.2337	9.1392	8.7133	9.6316	4.3657	6.7587	6.8862	13.0359	9.55131		CGGA_267	51.92	41.92	7.65	0.31	1.07	2.63	16.94	22.98	0.76	5.44	8.76	24.1	0.35	3.15	1.57	134.04	1.75344		CGGA_1451	56.92	98.3	1.21	9.73	3.12	15.02	29.95	37.25	13.16	7.67	10.49
TCGA-VM-A8CH-01	11.6472	11.673	10.7746	6.9161	7.091	8.758	9.8292	10.3501	4.008	8.8654	8.8828	9.4074	5.0054	7.9464	7.2014	12.9744	9.93588		CGGA_273	65.35	44.14	7.04	0.91	4.05	9.33	20.16	13.68	1.26	7.1	16.7	37.77	1.72	5.17	5.17	152.35	3.78359		CGGA_1452	40.59	89.59	0.81	6.07	4.38	14.13	26.55	51.86	16.23	5.32	9.39
TCGA-DB-5274-01	10.9611	10.4272	10.2567	6.7224	6.974	7.7622	9.1649	10.886	5.149	7.8935	8.4195	11.4075	6.0804	9.6384	7.9415	13.1158	10.5647		CGGA_283	50.31	26.32	6.85	0.61	2.79	6.83	13.53	14.34	0.29	6.26	20.2	26.03	1.76	2.21	3	119.74	2.98337		CGGA_1454	43.52	5.48	2.51	1.99	4.77	3.99	7.69	17.61	0.74	3.37	25.64
TCGA-HW-7487-01	11.1321	11.5358	11.0774	6.6423	8.0335	7.8049	9.141	10.3294	3.9911	8.2544	10.0442	9.292	3.39	7.5577	6.9416	12.7987	9.86841		CGGA_300	50.35	42.52	5.81	1.54	3.9	9.88	19.28	15.55	0.9	5.43	23.73	42.81	1.02	14.91	4.14	127.01	13.8153		CGGA_1455	13.73	2.01	5.73	0.13	0.38	1	2.98	2.64	0.17	2.13	3.23
TCGA-HW-7491-01	11.6112	11.5509	11.2847	3.8991	6.638	6.7856	9.6442	10.8512	3.0443	7.91	9.0104	10.0876	4.0831	7.4463	5.0899	12.9861	9.49792		CGGA_333	47.52	25.44	6.22	1.58	4.88	8.4	21.7	26.06	1.58	8.92	11.89	43.15	5.32	15.12	5.86	167.22	13.0317		CGGA_1457	87.58	89.83	3.96	12.19	7.27	16.44	34.3	35.66	20.41	15.35	19.61
TCGA-CS-4944-01	11.5088	14.4585	10.7761	4.1411	7.6954	8.4821	9.4026	10.3957	2.4697	9.0097	9.0251	9.8564	5.0121	7.1923	6.5437	13.6882	10.0437		CGGA_337	52.08	32.1	5.33	4.23	5.12	8.16	17.62	15.58	1.09	9.79	33.56	31.07	4.56	12.25	5.42	146.16	12.4721		CGGA_1461	121.13	78.25	1.95	0.9	2.79	4.77	25.69	25.27	21.72	8.29	21.81
TCGA-FG-A6J1-01	11.5621	10.2737	10.4178	6.1814	7.8254	8.471	10.1689	10.1689	4.8185	7.7326	8.3176	10.3171	5.5349	8.7033	8.1765	13.4701	9.91358		CGGA_446	37.4	19.78	5.13	0.4	0.74	2.64	17.99	14.43	0.4	4.67	17.18	26.62	1.38	5.45	1.93	169.44	7.60438		CGGA_1462	108.86	151.12	2.48	4.58	7.75	15.83	24.42	32.49	3.36	8.35	25.54
TCGA-S9-A7R7-01	11.7843	14.0872	10.2943	9.1664	9.0422	10.0852	10.5004	10.0309	4.3582	9.8769	8.7638	9.764	5.8121	9.947	8.1675	13.1154	11.3107		CGGA_479	58.27	104.01	5.8	0.6	2.4	6.67	17.23	21.49	0.18	6.83	10.24	37.05	2.08	13.51	3.76	120	12.0784		CGGA_1463	66.09	23.36	8.3	0.29	1.2	3.12	14.81	20.39	0.95	4.96	15.69
TCGA-TM-A84R-01	11.0867	11.6577	10.7759	7.6849	8.6615	7.8593	8.8487	9.9594	1.9279	8.0305	10.5236	9.0842	3.235	8.1993	7.0535	12.7198	9.98913		CGGA_485	38.93	19.67	6.81	0.31	1.13	3.67	14.55	20.91	0.43	8.06	9.89	33.41	1.65	8.99	1.66	173.25	8.75783		CGGA_1467	14.04	5.95	4.94	0.48	0.71	2.18	4.67	4.34	0.03	1.64	3.91
TCGA-QH-A6X8-01	12.0326	11.2974	10.2987	5.4291	7.4603	8.7908	9.9402	10.2154	4.4622	8.9347	9.0276	10.1529	4.7866	6.9412	6.4123	12.9336	9.6544		CGGA_490	48.42	41.5	6.35	0.46	1.65	7.3	14.14	18.54	1.35	6.91	11.9	34.7	1.02	9.43	1.85	134.65	7.75445		CGGA_1469	16.91	4.56	4.44	0.13	0.2	0.7	3.44	3.62	0.12	2.01	5.46
TCGA-HW-A5KM-01	11.8189	12.2875	10.7755	8.8197	10.3435	11.2859	9.9358	9.9812	6.059	9.8252	8.8888	9.7473	6.2758	6.2392	8.8355	13.8002	10.1134		CGGA_491	71.79	91.34	6.68	1.16	2.12	9.87	25.76	18.19	0.55	4.01	30.19	53.81	1.84	19.29	2.39	160.23	17.4194		CGGA_1471	61.9	36.51	3.09	1.01	4.13	14	27.61	19.78	1.66	8.26	7.16
TCGA-HT-7477-01	11.7186	11.7209	9.8233	6.5339	7.7415	9.0113	10.1133	10.2598	3.7438	9.0186	9.2658	11.6044	3.7028	8.7682	6.6732	13.6689	10.7294		CGGA_501	53.52	29.61	7.31	0.5	2.09	7.77	17.96	21.59	0.48	6.02	7.24	39.33	1.76	5.57	2.91	194.06	4.8176		CGGA_1472	19.06	8.06	5.07	6.37	7	13.2	29.15	31.74	3.49	0.93	1.12
TCGA-QH-A65V-01	11.4184	10.8653	10.4279	6.9888	7.0049	8.8555	9.488	10.6564	3.5773	8.8643	8.8421	10.1826	3.7402	8.2086	6.363	13.363	10.0601		CGGA_502	58.79	103.42	10.66	0.63	3.42	9.59	15.54	15.21	0.68	9.63	12.06	31.13	1.1	3.4	2.9	136.92	8.46324		CGGA_1474	17.09	10.29	3.52	1.39	1.59	3.68	5.38	5.34	0.14	3.55	5.5
TCGA-DU-8167-01	11.6624	11.3098	10.7343	7.2861	8.8111	9.7031	10.0756	10.1302	3.3464	9.3165	8.5115	10.3158	4.9742	7.1615	8.0424	12.714	9.98171		CGGA_510	62.34	59.95	10.69	0.54	1.71	5.26	16.39	21.67	0.41	7.04	9.76	30.82	1.74	10.2	3.15	159.81	4.51486		CGGA_1476	46.04	73.32	2.25	1.23	2.42	8.37	18.99	91.62	11.26	2.3	14.14
TCGA-FG-5965-01	11.7378	12.1178	11.3342	6.0629	8.0666	8.6387	10.1386	10.0655	3.8921	9.5111	9.6251	9.7526	5.5594	7.8681	7.2919	12.6745	10.4193		CGGA_543	46.9	16.18	4.27	0.59	2.01	5.61	10.15	14.09	1.03	4.65	14.36	28.19	0.25	5.22	2.62	116.9	1.92669		CGGA_1477	27.83	13.56	2.62	2.54	2.43	10.15	19.6	72.5	0.53	2.43	3.67
TCGA-HT-A614-01	11.9275	12.5988	10.5999	5.942	7.6889	8.8621	10.0883	10.4946	5.3913	8.9529	9.0344	10.0773	4.3582	8.3284	7.0886	13.1187	10.3118		CGGA_551	41.87	22.41	8.13	0.45	2.83	2.7	14	15.32	0.43	5.22	13.4	30.03	1.13	6.06	1.47	126.19	5.60364		CGGA_1478	134.54	17.8	1.88	1.29	1.81	8.65	33.53	187.97	2.85	6.32	13.73
TCGA-HT-7695-01	11.3327	11.3773	10.9164	6.0323	7.8839	7.5507	9.493	10.2146	3.8528	8.4201	9.8109	9.5926	3.189	7.8254	6.0925	12.9828	9.91786		CGGA_560	60.73	5.69	6.46	0.62	3.76	3.28	19.61	21.66	0.4	8.27	11.48	46.02	2.52	5.18	3.93	138.18	2.45747		CGGA_1481	12.31	21.43	2.76	0.9	0.62	2.15	3.41	3.87	0.36	3.26	2.03
TCGA-QH-A6X4-01	11.2416	11.685	11.3066	4.2501	6.7654	8.2	10.3656	10.2215	2.9109	8.1772	9.2484	9.279	4.1288	5.4954	6.1063	12.7098	9.16005		CGGA_580	66.21	30.58	5.92	0.46	2.98	7.62	17.03	20.49	0.4	7.7	17.89	36.43	1.16	8.1	2.14	141.5	2.90351		CGGA_1482	31.93	1.5	1.37	2.87	1.12	5.93	13.43	55.58	0.78	0.95	1.87
TCGA-DU-6399-01	11.7352	11.8706	11.1331	6.1008	8.1561	9.3283	9.9789	10.365	3.5908	8.9002	9.215	10.2763	4.8969	7.5062	7.0867	12.9037	10.1388		CGGA_591	51.14	79.1	8.68	0.61	1.66	6.82	17.75	20.59	0.83	9.2	11.47	45.16	1.31	5.52	2.42	130.21	12.5315		CGGA_1486	21.35	35.57	1.76	1.24	0.7	2.61	4.52	4.22	0.17	1.17	4.98
TCGA-E1-5307-01	11.3169	12.0533	11.6571	4.8383	7.8125	8.8559	9.8195	10.4547	2.336	8.9693	9.9879	9.4236	2.9989	5.9987	6.3442	12.5746	9.68162		CGGA_598	49.17	17.54	7.41	0.22	1.78	4.62	17.29	18.99	0.25	5.85	13.32	47.49	1.29	4.94	1.99	155.57	7.21953		CGGA_1488	75.3	18.66	11.37	0.73	3.23	7.18	17.03	12.22	0.56	6.05	18.35
TCGA-S9-A7QW-01	11.7871	10.9166	10.7855	4.2577	6.1037	7.1113	9.9492	10.1669	4.3214	8.4069	9.272	9.8953	2.7249	6.5973	5.4363	12.5002	9.22457		CGGA_601	47.14	30.27	5.2	1.5	4.25	4.96	17.08	7.67	0.54	5.52	40.47	22.48	0.82	11.94	5.28	119.8	11.3592		CGGA_1491	67.21	170.32	2.97	0.46	1.44	5.58	25.43	24.61	2.43	8.05	28.72
TCGA-HT-7604-01	11.7019	13.8336	11.1815	2.8528	7.2102	8.1281	11.0249	10.1293	3.6014	8.9702	8.7365	10.3906	3.3465	7.0048	6.4987	13.6877	10.0583		CGGA_607	68.91	33.8	5.83	0.45	3.36	6.14	20.93	13.35	0.93	8.21	11.93	45.01	0.97	4.24	3.04	163.02	1.82384		CGGA_1494	10.94	30.19	3.5	0.67	0.51	2.39	3.79	1.75	0.04	2.15	4.96
TCGA-P5-A733-01	11.5665	13.9752	10.3498	4.4553	7.0335	7.766	9.8406	10.1083	2.5531	9.1405	8.8881	9.8747	3.4247	6.7823	6.9733	13.151	9.75246		CGGA_632	48.92	65.22	5.88	1.02	1.12	4.43	23.76	8.74	0.67	9.86	24.31	36.05	2.3	30.53	4.32	95.08	20.6459		CGGA_1497	85.61	6.3	8.84	0.58	2.9	8.31	33.39	26.84	0.49	6.11	21.49
TCGA-HT-7684-01	11.4317	16.0972	10.3244	7.7437	7.1037	9.2694	8.8582	11.683	6.7618	8.4548	9.3357	9.9934	6.1141	8.7518	7.3143	13.7566	10.8988		CGGA_635	55.99	48.91	8.03	0.25	1.64	3.94	16.28	24.69	0.59	7.91	16.84	41.73	1.13	9.08	1.97	178.76	9.69109		CGGA_1500	54.45	23.2	1.97	1.54	3.76	9.85	13.42	21.5	3.71	4.34	41.99
TCGA-HW-7495-01	11.2741	12.0581	10.9255	5.8041	7.3103	8.0246	9.5858	10.574	3.9618	8.7888	9.2009	9.4913	3.506	8.3607	6.8595	12.9126	10.1617		CGGA_641	58.95	26.91	11.35	0.46	1.56	3.05	15.33	11.04	0.89	7.3	27.33	26.19	2.07	14.88	1.92	96.92	5.76182		CGGA_1501	21.2	8.67	0.74	6.67	5.06	8.95	18.44	25.56	1.9	1	8.28
TCGA-QH-A65R-01	11.7622	11.1795	10.5891	5.1461	6.4261	6.5462	9.8567	10.1287	4.1362	8.9213	9.8956	10.0195	4.3271	8.5696	6.8404	12.9722	10.2046		CGGA_642	67.28	42.39	8.52	0.63	2.27	5.83	16.61	15.15	0.36	6.65	13.63	21.99	0.44	3.64	3	143.2	-2.53472		CGGA_1502	42.58	7.63	1.2	0.88	1.32	5.68	19.32	28.37	8.71	3.29	5.46
TCGA-DU-A7TG-01	11.2288	11.8128	10.7411	8.4707	8.9024	8.4416	9.1314	10.3063	3.8706	8.5079	11.0367	9.3228	4.5453	7.814	7.5874	12.7439	10.3679		CGGA_655	48.05	24.31	10.97	0.36	1.69	6.24	16.74	20.11	0.75	6.95	10.87	38.8	1.4	12.69	3.18	150.51	8.70239		CGGA_1503	20.68	10.36	4.71	3.39	1.67	5.27	6.24	2.46	0.2	2.96	7.03
TCGA-DH-A7UV-01	11.7541	12.4616	11.0498	5.4107	8.3808	8.9665	10.6443	10.324	2.1473	8.7852	8.7864	9.2382	4.5769	7.6156	7.8313	12.3696	9.88929		CGGA_662	47.01	21.14	8.4	0.23	1.7	6.2	20.83	32.86	0.51	6.92	8.09	45.34	2.09	7.98	2.97	175.98	9.71849		CGGA_1504	40.96	7.28	2.29	7.1	2.52	10.85	22.65	20.01	3.7	2.32	4.03
TCGA-HT-7879-01	11.6502	11.9988	10.8008	5.3733	8.1455	8.9848	10.546	10.414	3.6559	9.1087	8.8791	9.5609	4.8	8.1904	7.4242	12.5915	10.2598		CGGA_666	45.16	28.14	7.4	0.93	2.79	5.37	17.2	12.93	0.43	6.31	28.37	32.99	1.22	4.7	3.17	118.39	9.52833		CGGA_1508	54.94	10.66	1.38	1.81	4.58	11.56	25.81	13.71	1.48	4.01	5.29
TCGA-P5-A72W-01	11.8634	12.9552	10.4008	5.6902	7.1678	8.1704	9.6701	9.5889	4.572	8.9954	8.5688	10.2826	4.6321	6.9664	6.9067	13.1924	9.67741		CGGA_671	39.31	18.78	6.15	0.59	2.87	2.62	12.99	16.6	1.03	4.09	24.3	27.73	0.47	6.07	2.52	176.2	8.34277		CGGA_1514	30.99	47.8	2.48	1.72	1.45	3.95	8.56	6.18	0.34	7.13	5.03
TCGA-CS-4942-01	10.9048	10.6866	10.4689	7.5508	8.4113	10.0378	9.9385	10.297	3.5085	9.3065	9.3637	10.0032	6.1893	6.9402	7.1965	13.2541	10.3107		CGGA_675	69.59	35.59	8.27	0.28	1.53	3.59	18.76	13.9	0.53	5.19	13.65	31.41	1.12	7.01	1.91	143.47	-1.20061		CGGA_1516	66.57	20.88	4.04	0.3	1.91	3.5	26.7	29.24	1.33	4.26	6.92
TCGA-DU-A7TC-01	11.7309	12.2941	10.3398	6.3202	7.6898	8.398	9.4166	9.9428	4.5157	8.565	10.5404	10.1259	3.7125	8.0692	6.6129	12.6702	10.3045		CGGA_685	61.55	32.35	10.19	0.5	2.23	8.2	18.11	18.01	0.61	8.01	11.85	35.94	0.69	4.57	5.22	159.14	2.44756		CGGA_1517	57.38	3.76	4.39	0.5	0.97	3.51	25.71	34.35	0.67	4.41	5.37
TCGA-HT-7610-01	11.3861	11.1129	10.7577	6.5683	8.4219	8.0967	9.7621	10.2008	2.6221	8.4975	9.8551	9.0629	2.8564	7.1288	6.7134	12.8505	9.62015		CGGA_689	80.91	14.05	34.79	0.73	1.82	2.02	16.61	28.17	0.63	4.84	21.06	33.55	1.69	11.97	3.63	133.19	-1.86895		CGGA_1518	142.8	17.82	6.42	1.31	4.99	19.82	17.17	178.11	6.42	4.28	35.55
TCGA-S9-A6TW-01	11.6721	12.5171	10.7288	5.1051	6.6264	6.912	10.142	10.9811	4.4357	8.5751	9.2994	10.054	5.4514	10.9677	7.601	12.8936	11.0774		CGGA_698	58.63	66.5	10.19	1.15	3.35	12.7	24.46	14.14	0.95	8.9	13.13	35.78	1.58	6.72	4.06	138.89	8.73814		CGGA_1521	57.52	68.34	3.36	3.46	4.27	10.8	38.33	67.94	1.77	12.69	26.3
TCGA-FG-A60J-01	11.935	13.3057	11.2147	5.7769	7.3479	8.5046	9.9279	10.4799	4.6314	8.7976	9.3606	9.7617	5.6745	7.525	6.6302	12.6373	10.0988		CGGA_704	48.17	14.53	10.58	0.84	2.35	11.67	18.33	28.36	0.54	6.58	11.34	46.15	1.76	20.08	3.32	183.86	13.1088		CGGA_1523	61.69	74.94	9.64	1.67	2.88	6.15	21.53	14.63	1.98	8.52	20.84
TCGA-E1-5303-01	11.5612	13.0226	10.6853	5.6093	8.4481	10.4065	9.9774	9.9289	3.0435	9.1609	9.1536	10.2099	5.2182	7.9247	7.6298	13.2847	10.4997		CGGA_710	53.85	34.5	4.21	3.75	7.29	24.66	18.74	26.66	1.71	7.58	10.78	37.49	7.78	41.61	10.32	164.52	18.7952		CGGA_1525	20.88	4.72	1.01	4.65	3.45	10.22	16.74	29.73	2.7	0.72	2.27
TCGA-HT-7481-01	11.4025	11.9501	10.5063	4.8411	7.2551	8.119	9.6538	10.5565	3.3535	8.7135	9.4124	10.4368	3.2982	7.4611	6.2019	13.13	10.0215		CGGA_715	48.96	22.39	7.31	1.06	2.71	3.24	8.4	14.21	0.42	3.9	25.37	16.08	1.09	19.4	3.07	108.49	5.77719		CGGA_1526	66.88	33.77	12.18	1.08	1.66	10.56	19.06	19.8	1.35	7.85	16.45
TCGA-FN-7833-01	11.7515	13.3312	11.2395	8.8286	9.6024	9.8694	10.1116	10.3139	4.753	9.3246	8.8726	10.4861	5.32	7.773	8.5603	12.7549	10.5984		CGGA_725	42.96	55.99	8.71	0.18	1.4	6.02	18.17	23.62	1.23	6.51	6.78	31.98	0.79	7.26	3.25	159.85	9.65428		CGGA_1527	72.84	18.39	3.8	1.03	1.93	7.54	19.08	13.81	1.85	5.84	11.37
TCGA-S9-A7QX-01	11.9269	12.6244	10.4769	6.7464	7.2038	9.2487	10.1718	9.8549	3.3518	8.9794	9.0234	10.0182	4.4712	8.2191	7.3494	12.5583	10.1972		CGGA_747	47.03	233.33	13.32	0.17	0.77	2.99	26.71	10.85	0.64	10.14	21.24	94.9	1	65.9	2.6	138.31	60.7101		CGGA_1528	49.04	3.83	3.71	0.75	2.65	8.54	25.35	62.39	1.2	2.97	3.72
TCGA-DU-7300-01	11.4067	12.3145	10.5177	6.3355	8.0557	8.2919	9.1885	10.519	3.1607	8.5404	10.2324	10.1249	5.7971	7.4408	7.0046	12.9636	10.2189		CGGA_752	55	26.36	5	0.74	1.99	8.63	18.98	17.53	0.89	7.63	14.44	44.3	1.03	7.11	3.39	174.25	7.29251		CGGA_1529	32.83	40.75	3.65	0.47	2.3	3.31	16.52	27.44	2.53	4.73	10.84
TCGA-HT-7473-01	11.1215	12.9691	11.1782	7.4084	9.3381	9.9982	10.4681	10.5144	3.2916	9.8594	8.732	9.9212	6.8214	7.6058	7.9811	13.1559	10.7984		CGGA_757	56.31	83.27	8.25	0.31	2.11	6.73	21.54	23.39	0.65	8.72	11.21	34.17	1.08	13	2.45	133.95	11.7854		CGGA_1530	4.55	3.97	2.55	4.97	7.54	2.09	36.25	30.1	0.11	0.4	0.56
TCGA-DU-5855-01	11.3989	13.6249	11.3735	7.5766	8.4425	9.4841	10.2145	10.3174	3.2952	10.1458	9.665	9.6571	4.2714	8.3008	7.6096	12.9092	10.9967		CGGA_760	47.01	71.49	4.99	1.13	1.99	5.7	13.15	10.58	2.05	6.44	20.42	26.93	1.26	11.21	1.83	103.66	10.7821		CGGA_1534	49.37	8.15	2.72	1.76	2.76	9.18	22.91	20.38	1.92	3.24	6.06
TCGA-DU-7008-01	11.8002	11.1359	10.9555	5.4565	6.7862	7.5532	9.7647	9.9986	3.0576	8.8395	9.9856	10.3771	4.5706	6.4785	5.6717	12.7265	9.66261		CGGA_761	117.09	196.37	10.77	3.11	3.78	15.14	18.63	26.39	0.36	12.17	20.7	53.92	2.17	164.94	4.69	121.25	55.971		CGGA_1536	63.58	55.09	9.72	1.47	4.27	12.92	22.84	18.9	0.51	8.64	19.06
TCGA-S9-A6WG-01	11.8475	12.7198	10.8943	8.2458	9.1996	9.2781	10.3612	10.1935	6.0936	10.0854	9.3319	10.935	6.7092	10.8577	8.9459	13.1514	11.9261		CGGA_762	51.57	16.99	9.5	0.51	2.75	4.96	15.07	19.55	1.24	5.13	14.28	17.58	2.12	6.84	4.02	101.07	0.0851933		CGGA_1537	89.38	137.38	2.68	2.08	3.6	9.93	27.56	26.56	7.16	8.43	14.88
TCGA-DB-A4XB-01	11.8249	11.3478	11.0197	6.4551	8.3224	8.5923	9.9805	10.0484	3.0867	8.9627	9.63	10.0752	4.0467	7.1801	6.2773	12.8669	9.91158		CGGA_785	51.07	50.67	5.22	0.31	1.78	5.61	13.78	14.87	0.68	7.31	9.66	32.61	0.75	5.88	2.48	139.79	5.28027		CGGA_1539	102.37	33.75	7.49	0.86	4.24	6.1	31.84	10.73	1.17	7.18	16.47
TCGA-DB-A75O-01	12.0226	12.5953	10.9711	8.0842	8.3089	9.9982	10.174	9.814	3.6021	8.4703	9.2142	9.7826	4.68	7.4528	7.6636	13.0078	9.92563		CGGA_812	44.23	21.06	4.36	2.32	3.53	12.86	18.08	16.07	5.46	8.77	15.14	35.48	7.1	12.94	4.27	146.77	11.1149		CGGA_1542	11.74	4.57	2.26	0.22	0.61	1.7	4.29	2.95	0.08	2.19	3.92
TCGA-HT-7688-01	11.1266	11.7628	10.8474	6.9216	8.4005	7.9123	8.7844	9.8492	3.3244	8.5646	10.4459	9.5486	3.7329	7.5069	6.7888	12.8185	10.0209		CGGA_815	59.93	120.01	7.82	2.21	4.4	18.67	25.31	14.18	1.29	9.93	12.03	30.56	6.89	9.52	2.35	167.41	14.0567		CGGA_1543	38.85	15.36	1.46	12.4	8.14	18.94	22.25	109.43	10.41	2.88	6.67
TCGA-DU-6394-01	11.6719	12.6494	11.3227	5.2379	6.7937	7.4912	9.6452	10.4467	2.8235	9.6504	9.9435	9.355	3.1151	9.0948	6.239	13.6387	10.5917		CGGA_818	37.27	103.88	10.85	1.32	4.32	11.69	18.23	39.75	1.23	13.2	25.33	32.16	5.31	6.59	4.73	132.87	23.7191		CGGA_1544	45.69	36.07	4.46	0.15	0.83	3.87	21.62	16.18	0.48	5.04	10.84
TCGA-HT-A74J-01	11.8057	11.6063	11.1188	6.0705	8.1866	8.7093	10.7631	10.0163	2.2911	9.1884	9.3261	9.0457	4.2611	8.3581	7.3202	12.6072	10.1882		CGGA_834	122.77	563.08	4.23	1.3	3.81	7.25	21.39	22.95	0.84	9.27	22	89.3	1.04	579.99	4.24	243.9	223.849		CGGA_1546	67.27	20.6	2.06	6.42	3.92	10.86	26.16	56.71	15.06	6.58	8.56
TCGA-DU-A5TR-01	11.9495	11.0846	10.1999	10.3575	10.075	10.8847	10.4231	9.8968	5.1216	9.4259	8.8798	9.6887	7.3026	8.241	9.1358	12.9248	10.5034		CGGA_835	50.39	19.11	5.82	0.95	0.83	4.68	15.72	29.26	2.55	7.71	9.22	43.34	1.12	13.84	2.05	178.21	8.96578		CGGA_1548	68.09	19.52	3.44	3.93	3.49	10.5	27.48	48.71	7.02	4.35	12.96
TCGA-S9-A6WD-01	10.8836	10.8225	10.5499	4.3435	6.6075	7.7941	9.8604	10.4947	4.3141	8.7321	9.147	9.9012	3.6904	6.8731	5.7975	13.2223	9.77448		CGGA_838	34.19	18.1	5.52	0.58	1.08	1.62	13.99	14.58	0.5	5.22	23.65	25.13	0.45	4.34	1.58	170.5	8.89748		CGGA_1551	35.31	31.6	0.86	12.02	5.23	15.97	29.73	40.64	14.47	1.98	5.19
TCGA-DU-A7T8-01	12.0924	12.4212	10.901	8.1274	8.2972	9.0227	10.1132	9.9925	4.8619	9.065	9.3356	9.7904	5.3305	8.6012	7.8407	12.9247	10.4233		CGGA_843	66.59	55.18	11.6	0.46	1.57	2.93	22.04	17.66	0.54	5.92	15.83	20.55	0.5	7.23	2.4	143.53	1.03235		CGGA_1552	62.74	7.12	4.58	0.21	1.69	5.95	22.02	42.48	2.01	5.04	6.12
TCGA-FG-8185-01	11.6438	11.68	11.1429	5.0644	6.918	7.7422	10.1664	10.0644	2.3807	8.5093	8.2102	9.713	4.1805	7.2807	6.5341	12.6589	9.41566		CGGA_856	55.84	16.47	7.12	0.19	0.76	3.81	19.35	38.97	2.14	7.29	11.3	44.87	5.42	18.27	1.22	125.45	9.85187		CGGA_1557	48.48	3.79	3.75	0.77	0.72	1.86	15.92	43.72	1.9	1.69	11.28
TCGA-HT-7902-01	11.3787	12.5499	10.6949	5.9304	7.7992	9.4511	10.0866	10.4504	4.2179	9.1369	8.6178	9.835	5.1054	7.5301	7.2981	12.837	10.1845		CGGA_858	65.25	31.24	8.16	0.87	2.79	3.46	9.86	12.08	0.69	5.54	37.29	20.32	0.5	9.74	2.34	99.12	2.22611		CGGA_1559	70.13	4.7	3.05	0.56	1.19	3.81	20.2	21.52	2.49	5.72	14.83
TCGA-DU-5874-01	12.0893	10.4347	11.7956	4.2069	7.0852	6.6352	9.4434	10.5663	3.446	9.0071	9.5747	10.4259	3.8177	8.199	6.601	12.5938	9.91637		CGGA_864	45.39	28.42	7.56	0.93	2.65	6.83	13.83	19.34	0.53	7.98	14.83	27.93	1.38	58.43	3.84	130.08	22.2579		CGGA_1560	91.52	5.33	3.97	1.37	1.57	5.72	30.21	15.51	5.97	9.36	19.04
TCGA-FG-7641-01	11.1379	11.8939	11.0947	5.444	7.5117	7.2173	9.4143	10.5581	3.2991	8.7917	9.4702	9.6121	2.26	6.7877	4.9096	13.0121	9.64816		CGGA_884	84.71	37.39	9.34	0.36	1.03	3.19	24.08	10.48	0.67	7.65	12.49	34.09	0.74	11.5	3.03	112.1	-3.64619		CGGA_1562	50.67	14.59	3.62	0.98	1.03	1.42	16.69	39.52	1.63	4.26	15.21
TCGA-FG-6690-01	11.8174	13.9526	11.0641	5.6566	7.722	9.0285	10.0709	10.0726	4.3481	9.419	9.2379	9.668	4.9768	6.7784	6.6775	12.7072	10.068		CGGA_892	69.01	21.52	10.14	0.2	0.97	4.49	17.95	21.5	0.95	6.41	8.86	22.16	1.64	9.89	3.13	145.54	-3.63693		CGGA_1563	71.56	58.83	7.28	3.86	4.64	8.9	27.29	38.94	9.98	12.22	20.75
TCGA-HW-8320-01	11.707	12.3891	10.9792	5.5711	7.9443	8.5564	10.1698	10.1334	2.6436	9.1627	8.8226	9.7577	3.6493	6.5342	6.7133	12.8528	9.62157		CGGA_893	61.62	23.79	7.7	0.79	2.96	5.69	14.93	9.99	0.43	6.35	28.62	25.11	0.37	7.82	2.44	105.39	2.1412		CGGA_1564	59.93	93.67	4.91	2.76	2.42	10.87	38.38	66.83	5.86	3.73	20.01
TCGA-R8-A6MK-01	11.4569	11.9521	10.8677	4.9321	6.6998	7.9864	10.071	10.5148	4.0147	9.1799	8.7968	10.2617	3.5575	6.2857	5.778	13.3323	9.66002		CGGA_898	50.56	78.82	8.57	1.01	2.23	5.56	20.07	13.99	0.15	4.92	20.41	24.48	0.54	17.23	2.97	103.93	12.6193		CGGA_1565	30.19	41.21	2.01	2.16	2.69	9.01	22.63	29.07	0.68	5.01	5.15
TCGA-QH-A6CY-01	11.1768	10.7995	10.6126	6.1435	7.6484	8.3393	9.5176	10.4046	3.2123	8.8956	9.351	9.7681	4.3707	6.9797	6.2443	13.1856	9.79037		CGGA_904	73.72	30.3	10.77	0.66	1.63	3.11	19.44	16.74	1.53	8.73	10.91	52.48	1.07	3.93	2.88	170.07	1.23566		CGGA_1566	60.14	1.81	3.64	0.29	0.27	1.1	15.53	65.34	1.02	1.94	4.86
TCGA-S9-A7J1-01	11.4633	9.963	11.5663	4.9131	7.4365	8.3802	10.1755	10.7475	4.6741	9.1387	8.7864	9.6471	4.8118	6.9797	5.7724	12.809	9.72329		CGGA_905	52.72	77.99	4.61	1.17	3.83	13.38	25.76	14.22	1.9	7.51	9.27	23.84	1.88	26.08	3.74	127.71	14.0186		CGGA_1567	36.14	6.01	2.84	7.9	6.29	10.66	15.92	87.48	5.26	2.84	11.24
TCGA-P5-A72X-01	11.8643	13.8455	10.9469	4.825	8.1705	7.7358	10.4983	9.6975	3.6223	9.2969	9.2969	9.5537	4.7257	8.2598	7.7982	12.9582	10.3902		CGGA_908	77.81	37.67	10.31	0.41	2.36	8.42	19.27	9.86	0.61	7.83	15.13	36.68	0.98	4.7	3.73	106.44	-2.57181		CGGA_1568	44.57	8.4	2.45	3.87	4.06	8.8	15.74	25.76	1.6	2.1	4.44
TCGA-E1-5322-01	11.6059	10.8537	11.489	7.7599	8.3731	9.9379	9.9594	10.5192	2.8802	9.2886	9.4554	10.1765	5.4812	8.8077	7.3737	12.9784	10.7161		CGGA_909	55.99	30.17	11.42	0.65	1.99	3.75	22.52	15.38	1.02	7.57	12.23	33.75	2.49	19.13	6.19	146.93	8.43529		CGGA_1569	38.66	4.68	3.44	0.96	1.18	6.7	13.62	45.16	1.67	1.63	2.1
TCGA-P5-A5F0-01	11.4413	11.3345	10.8566	6.2733	7.8986	7.1989	9.7585	10.1853	3.0406	8.4521	10.5594	9.394	3.9917	8.2614	6.5205	12.4076	10.1865		CGGA_D04	63.47	41.75	6.19	0.13	0.81	2.92	19.44	11.03	0.19	5.86	13.2	34.78	0.2	5.63	1.5	112.28	1.22179		CGGA_1571	28.9	2.63	2.83	2.69	3.7	9.75	17.94	20.19	1.05	2.02	8.31
TCGA-R8-A73M-01	11.8756	9.3331	10.4568	5.1635	6.1653	6.0155	9.912	9.9275	4.2452	8.272	8.7035	9.8973	4.7618	7.7514	5.7052	13.1078	9.23445		CGGA_D07	38.38	34.85	2.94	0.42	1.9	4.26	11.7	20.14	1.01	3.48	10.57	33.97	1.14	6.8	3.09	113.18	7.62179		CGGA_1579	41.14	3.17	3.36	4.49	2.59	6.38	13.52	6.6	0.89	1.58	10.22
TCGA-DB-A4X9-01	11.6437	11.2178	10.422	4.8919	6.7817	8.4229	9.9042	10.1279	4.9171	9.2546	9.2108	9.5287	3.2244	5.6449	6.8808	12.8199	9.2607		CGGA_D15	75.63	33.63	13.61	0.14	0.57	1.36	16.32	16.2	0.45	6.35	13.53	28.02	0.19	2.49	0.83	115.13	-5.81578		CGGA_1580	66.52	64.7	7.66	1.33	3.76	10.89	17.25	17.64	0.76	7.57	14.32
TCGA-DB-A4XF-01	11.4556	13.4281	11.3131	5.5699	7.1824	8.291	9.8736	10.0173	3.8837	9.8102	9.8179	10.2047	4.2858	8.94	6.8966	12.7292	11.0272		CGGA_D20	38.11	62.6	9.08	0.84	3.94	3.58	12.68	6.78	0.16	4.24	26.42	23.28	0.41	9.7	3.2	113.39	12.4251		CGGA_1583	47.35	20.49	3.25	3.07	3.57	5.34	14.24	37.78	1.81	2.61	29.5
TCGA-QH-A65X-01	12.0376	10.2937	9.7396	6.0183	6.7907	7.0537	9.8827	10.0514	4.9571	8.7842	8.7351	10.4991	5.7899	10.2699	7.9191	13.5776	10.4518		CGGA_D21	42.03	59.1	6.2	4.12	2.68	13.1	24.38	16.51	2.49	9.34	20.92	96.25	4.91	51.15	3.68	196.05	42.8745		CGGA_1586	80.63	129.62	2.67	6.69	7.7	16.96	33.81	44.2	31.92	14.17	16.12
TCGA-DU-A6S3-01	11.9076	10.021	11.0995	6.1813	7.7053	7.4853	9.6272	9.8856	3.3936	8.5171	9.6694	9.3357	3.5249	7.6125	6.8841	12.8406	9.46488		CGGA_D24	50.82	79.38	6.13	2.1	2.62	8.52	25.9	8.44	1.11	4.05	17.61	74.14	3.17	35.74	3.08	105.53	28.6013		CGGA_1587	72.69	91.65	3.21	6.18	3.49	12.41	26.13	18.44	2.44	7.8	15.51
TCGA-DB-A4XH-01	11.682	10.2744	10.9227	4.3834	7.6298	7.2184	9.878	10.1169	4.4577	8.4528	9.4127	9.9246	3.5897	7.0423	6.7186	12.5184	9.47754		CGGA_D29	60.25	29.47	5.09	0.15	0.97	5.52	14.69	21.82	1.04	4.44	10.71	29.44	0.53	4.04	1.63	131.41	-1.04091		CGGA_1588	27.91	4.62	25.71	22.97	9.68	41.15	53.43	23	3.88	0.48	1.72
TCGA-HT-7485-01	11.1927	11.5969	11.0309	4.9174	7.9104	9.0304	10.1123	9.9037	3.1755	9.1288	8.4743	10.0835	4.24	5.2712	6.4701	13.5893	9.35908		CGGA_D47	71.06	42.61	4.42	0.92	2.77	4.46	22.07	20.19	1.36	9.82	16.8	47.23	2.38	67.57	5.26	199.58	24.4113		CGGA_1595	39.41	5.88	3.19	0.93	0.61	2.1	18.78	32.59	0.5	1.02	8.38
TCGA-VW-A7QS-01	11.8281	15.5504	10.428	4.8259	5.8102	6.3427	9.7878	11.0004	5.2183	8.907	9.9718	9.3697	2.7615	10.6806	6.1604	12.6981	11.085		CGGA_D52	49.22	64.95	4.87	0.68	1.87	2.31	11.33	13.36	0.82	4.69	23.82	46.2	0.9	21.98	2.63	110.02	16.8241		CGGA_1596	57.25	75.96	1.57	1.59	4.6	12.47	29.91	48.43	6.14	4.24	10.22
TCGA-DU-8164-01	11.471	11.4174	11.0585	5.023	6.9734	6.6196	9.7307	10.6013	3.6995	8.7976	9.5843	10.044	3.5006	7.8592	5.5805	12.6845	10.001		CGGA_277	33.22	9.01	3.19	2	3.55	7.9	9.51	39.46	0.34	4.55	15.37	40.94	0.6	21.28	6.27	216.77	16.612		CGGA_1597	74.19	25.09	1.55	5.11	5.29	23.32	27.56	51.04	5.24	7.3	11.69
TCGA-S9-A6TS-01	11.3561	11.7117	10.6933	6.352	8.3387	9.0013	10.1547	10.2073	3.5877	8.4879	9.8652	9.6991	4.3814	8.0041	7.9434	12.6821	10.303		CGGA_J023	76.96	69.95	10.27	0.4	1.26	7.15	16.71	30.02	0.75	10.28	36.36	238.96	1.11	82.67	4.12	181.34	74.4263		CGGA_1598	85.48	17.44	2.47	0.69	2	12.23	22.23	722.44	1.13	4.5	12.37
TCGA-DB-A64S-01	11.7709	13.2759	10.1525	8.6517	8.6727	9.3862	10.1229	10.3277	4.0646	8.7522	8.6393	10.081	5.2801	8.4736	8.1382	13.2653	10.4009		CGGA_1004	55.15	47.77	2.44	16.73	13.9	41.99	23.57	29.44	1.78	11.83	8.55	28.01	20.77	12.17	12.68	350.85	13.8131		CGGA_1601	121.63	97.43	2.84	5.61	4.8	13.73	29.69	28.6	20.28	13.81	24.63
TCGA-VV-A86M-01	10.8722	10.3635	10.7661	6.4511	7.0398	9.0114	10.092	10.6193	2.9442	9.3942	8.3747	9.9256	5.22	8.6658	7.218	12.7383	10.4684		CGGA_1008	109.03	191.35	10.08	0.49	3.64	4.14	19.98	26.11	7.61	9.16	24.69	75.56	1.32	401.47	9.45	219.53	136.522		CGGA_1606	75.22	49.22	3.01	0.72	1.32	4.76	17.05	178.86	1.45	6.17	20.25
TCGA-CS-6667-01	11.4071	13.6236	11.5282	4.8221	7.6167	8.3843	10.2661	10.2769	3.4953	9.1704	9.0826	9.4727	3.9237	9.0873	7.6729	12.7433	10.6905		CGGA_1053	63.11	87.95	3.11	2.9	4.99	18.66	24.22	39.95	7.8	9.84	19.5	111.68	4.37	328.95	7.8	265.51	129.71		CGGA_1612	83.55	42.89	4.5	9.95	5.88	17.37	28.9	75.78	5.75	10.48	41.04
TCGA-E1-A7YV-01	11.2752	14.7735	15.4603	6.0889	6.8705	7.9956	9.9324	10.2564	3.9543	8.5309	9.4224	11.4661	4.6962	10.132	6.79	13.0134	11.6223		CGGA_1070	104.29	178.12	5.29	2.83	5.22	12.88	24.15	16.74	2.62	10.54	29	72.28	1.62	827.99	5.87	198.59	269.266		CGGA_1613	64.47	35.84	2.15	8.19	6.33	32.07	33.01	46.71	10.93	8.54	20.94
TCGA-DU-5849-01	11.5574	11.9995	10.5019	6.1798	7.7657	8.4321	9.4089	10.3281	3.0534	8.812	10.2865	9.9602	4.6282	7.2296	6.9425	12.7912	10.0813		CGGA_1071	90.45	375.18	5.55	1.35	3.86	10.61	18.8	28.07	5.36	11.93	21.8	65.55	3.86	870.63	6.15	398.09	304.671		CGGA_1617	32.66	2.33	2.02	1.29	1.69	1.97	12.88	31.38	2.73	1.81	7.53
TCGA-DU-7299-01	11.7121	12.7627	11.334	5.3818	8.1153	9.5669	9.7413	10.258	2.8396	8.5814	9.4285	9.8356	4.3794	8.0915	6.7382	13.6558	10.2204		CGGA_1073	69.35	2125.3	1.96	2.76	3.49	6.64	15.76	12.86	5.32	10.42	33.13	31.75	2.84	1213.87	5.44	279.5	573.515		CGGA_1618	57.46	10.7	2.25	1.06	0.99	3.97	18.92	32.3	1.78	2.95	6.43
TCGA-TM-A84M-01	11.448	10.2198	10.8403	3.3945	5.074	4.9826	9.9206	10.2911	2.9298	8.8398	9.1753	10.0757	2.4728	5.6506	4.9636	13.0402	8.8927		CGGA_1074	46.81	222.36	3.96	7.71	9.58	17.13	18.84	10.54	2.83	12.34	26.79	47	11.62	301.23	9.63	182.56	124.782		CGGA_1619	44.22	36.6	2.36	0.82	1.36	3.01	13.36	37.81	2.2	2.85	11.15
TCGA-HT-7468-01	11.6511	11.379	10.5617	5.7395	6.6769	7.3862	10.0338	10.9265	3.2757	9.2847	8.8414	10.0623	4.7053	7.5854	5.8801	13.342	9.94793		CGGA_1114	74.15	284.19	3.38	9.17	12.01	16.51	32.24	43.12	4.79	25.81	23.03	47.93	13.89	532.95	29.76	290.9	201.009		CGGA_1620	46.14	5.75	2.82	1.06	3.23	5.81	19.44	18.48	0.34	2.94	11.32
TCGA-DB-5279-01	11.0619	11.9135	10.3967	5.1301	7.595	7.4433	9.5986	9.9892	2.6401	8.9154	9.8005	9.7172	5.9352	7.0534	6.5071	13.7916	10.0288		CGGA_1246	52.75	24.09	5.48	0.38	1.69	4.89	15.3	29.41	0.18	6.29	13.65	52.48	3.18	7.43	3.01	199.06	9.46136		CGGA_1621	61.02	15.57	2.7	0.46	2.01	5.2	27.09	25.25	1.65	3.42	5.52
TCGA-S9-A6U8-01	11.5915	11.3005	10.6034	6.1347	8.7771	9.6185	10.0876	10.5083	4.1522	9.2679	8.878	9.7148	4.5541	6.5242	7.4822	12.8358	9.76863		CGGA_1275	55.17	462.9	10.34	6.51	2.82	28.42	35.26	48.6	2.04	8.73	39.77	20.16	4.01	303.04	13.98	448.42	149.897		CGGA_1623	100.9	15.19	4.33	1.26	5.8	5.69	30.82	11.67	4.9	6.62	18.59
TCGA-HW-7489-01	11.5045	12.2331	10.7705	6.8083	8.432	8.2293	9.3171	9.8551	3.0552	8.5479	10.5093	9.3712	3.4722	7.9102	7.1535	12.8432	10.1178		CGGA_243	27.31	29.18	6.95	0.32	0.65	1.81	16.01	33.46	0	6.04	10.65	48.3	0.78	5.03	1.52	152.22	15.9404		CGGA_1626	52.29	171.68	2.58	5.01	15.69	21.79	37.61	1332.56	8.58	11.57	14.96
TCGA-DU-7018-01	11.7887	11.4776	11.2986	2.7537	6.2793	5.5377	9.6701	10.7497	2.6427	8.0887	9.7042	10.0636	2.2468	7.2955	5.7865	12.9717	9.39208		CGGA_247	56.31	176.22	11.88	0.53	2.17	4.04	23.78	23.61	0.47	9.1	14.39	91.44	1.03	20.17	4.72	151.99	36.0425		CGGA_1627	55.9	12.23	3.2	1.43	3.7	10.05	22.54	36.74	2.16	4.19	14.81
TCGA-HT-7677-01	11.6268	10.6766	11.6606	4.5685	6.8843	7.5773	10.0049	10.6774	3.0504	8.7941	8.9295	9.8248	4.9547	6.284	5.7712	12.6815	9.36429		CGGA_738	75.62	33.17	11.32	6.69	8.63	21	24.01	36.92	2.35	11.49	15.16	37.68	5.67	22.63	8.19	174.15	9.10824		CGGA_1630	28.21	1.84	1.1	0.65	1.65	5.97	11.29	21.22	2.54	1.31	3.66
TCGA-FG-A713-01	11.3562	12.0018	10.7258	7.1716	8.4237	8.0423	9.3123	9.8508	3.5045	8.2669	10.5594	8.8368	3.4486	8.3048	6.9019	12.9712	10.0998		CGGA_759	94.28	31.91	7.12	6.17	3.66	16.84	29.18	17.15	2.16	8.45	18.83	102.54	4.41	162.76	5.17	169.22	58.2145		CGGA_1634	91.65	6.12	1.48	5.08	7.08	11.13	27.65	20.63	16.3	5.46	12.58
TCGA-HT-7875-01	11.5037	11.781	11.3768	4.737	6.7507	6.8234	10.0521	10.5111	4.9395	9.0118	9.2963	9.556	2.4953	6.9976	6.1221	13.0268	9.69566		CGGA_D30	47.67	21.75	3.85	2.09	3.28	24.69	24.21	33.85	6.37	7.96	12.89	51.61	14.39	56.46	6.52	147.17	29.3741		CGGA_1635	6.66	3.15	2.14	0.25	0.72	2.31	2.27	1.64	0	4.54	3.32
TCGA-TM-A7CA-01	11.7464	12.8817	11.3988	5.3862	7.5979	8.2762	10.1272	10.3002	3.6856	9.2312	9.496	9.823	3.0215	5.8571	6.7331	12.4242	9.62773																					CGGA_1640	32.19	4.61	1.62	4.24	3.21	6.59	13.71	24.37	4.75	1.09	9.74
TCGA-HT-7690-01	11.9207	11.7672	10.325	8.6169	8.4865	9.8307	10.0722	10.052	4.7855	9.3609	9.5941	10.514	6.0075	8.0333	7.3712	13.0087	10.5997																					CGGA_1642	56.64	4.34	1.48	0.53	1.04	6.48	20.54	10.62	1.09	2.59	3.55
TCGA-FG-6689-01	11.6108	12.413	11.0649	6.9033	8.536	9.3754	9.6318	9.7883	2.6397	8.9051	10.0874	9.3903	3.747	6.4045	7.1591	12.8309	9.76117																					CGGA_1644	82.8	143.13	1.93	4.01	2.57	9.68	34.17	263.36	8.16	5.58	17.07
TCGA-DU-7007-01	11.2186	13.8918	11.4525	7.8335	8.2469	9.063	10.3348	9.7652	3.3167	10.1771	8.8759	10.0368	6.7222	8.2037	7.4619	13.5334	11.0241																					CGGA_1645	45.58	37.05	10.87	0.76	1.73	7	27.43	22.36	0.47	6.78	14.68
TCGA-DB-5277-01	11.4452	11.9184	11.351	5.8891	7.3809	8.1113	9.6706	9.738	2.5641	8.6915	10.0574	10.5291	5.102	9.1521	6.5494	12.8607	10.7468																					CGGA_1647	22.34	1.54	0.9	1.61	2.43	4.87	17.5	26.23	0.18	0.33	2.42
TCGA-HT-7694-01	11.0807	11.7444	10.9276	6.7088	8.1706	8.195	9.1982	10.0481	3.1527	8.149	10.5081	9.3309	3.6452	7.6996	7.0069	12.7609	10.0438																					CGGA_1648	16.47	2.4	0.45	1.72	1.54	3.8	10.98	21.89	0.67	0.52	1.85
TCGA-F6-A8O3-01	11.8515	9.8602	10.9204	4.2546	6.3335	6.1968	9.9441	10.5253	3.4221	8.0249	9.3086	9.8619	2.9541	6.7681	5.64	12.7986	9.028																					CGGA_1649	22.01	2.55	1.32	2.08	1.03	3.44	19.3	29.62	0.82	0.59	3.55
TCGA-QH-A86X-01	11.8207	11.5154	11.1982	4.7861	6.7314	6.8676	10.0659	10.494	4.1162	8.9215	9.1988	9.9287	3.9961	8.4951	5.9201	12.6401	10.0937																					CGGA_165	20.35	4.25	0.96	2.47	1.94	3.96	10.68	29.49	0.47	0.4	5.16
TCGA-HT-8013-01	11.6528	10.9517	10.664	9.821	9.6593	10.5537	10.5598	10.0505	3.6742	9.45	8.9269	10.261	4.1369	6.4376	8.8317	13.099	10.0001																					CGGA_1650	45.56	25.58	8.62	1.47	4.14	19.75	19.09	20.76	0.84	8.81	11.28
TCGA-HW-7490-01	11.6444	13.2282	10.5525	6.558	7.3559	7.7416	9.6051	9.9957	4.0166	8.7968	9.0486	9.8344	5.0284	8.1817	7.2033	13.1423	10.1388																					CGGA_1653	38.45	3.29	1.69	1	1.62	3.85	15.35	25.85	2.09	1.64	4.08
TCGA-QH-A65S-01	11.8302	11.5921	10.7595	5.7117	7.5661	9.0838	10.0453	10.4044	4.4867	8.5808	8.5692	10.0226	4.7055	7.3665	7.1842	13.3477	9.73126																					CGGA_1655	49.79	8.08	2.25	1.63	1.54	10.18	18.73	36.08	1.53	3.36	4.53
TCGA-DU-A76R-01	11.1123	12.5968	10.8353	5.4522	7.2233	7.5865	10.2116	10.4803	2.5365	9.2639	9.5618	10.0344	4.1366	8.7975	6.2903	13.0873	10.7685																					CGGA_1657	38.76	3.09	1.4	1.15	2.91	4.97	13.58	26.29	1.63	1.39	6.79
TCGA-DH-5144-01	11.5803	10.1159	11.8033	3.9316	7.0219	7.1106	9.5219	10.6503	3.2563	8.9043	8.8957	10.0069	3.7049	6.7089	5.89	13.2626	9.36376																					CGGA_1661	26.25	2.95	0.92	2.17	0.96	3.44	16.75	23.92	1.01	1.09	3.9
TCGA-HT-7606-01	11.2244	13.7656	10.0397	4.7175	6.5436	8.5804	9.6732	10.4871	2.4117	8.9004	10.0477	11.0434	2.7127	9.1868	5.6371	13.1232	11.0448																					CGGA_1662	48.14	10.13	1.21	1.73	1.01	4.55	18.31	27.35	2.27	3.17	10.1
TCGA-DB-A64V-01	11.563	10.9014	9.8284	6.6725	8.0578	9.8468	9.735	10.7894	6.0576	9.0989	8.8665	10.3838	7.1859	8.4395	7.6344	13.0022	10.5364																					CGGA_1664	51.56	14.34	2.64	1.3	2.87	5.7	14.7	25.34	1.46	3.66	20.96
TCGA-E1-5302-01	11.822	12.6705	11.0588	5.9538	7.8337	9.585	9.5806	9.9717	4.1859	9.2657	9.5959	10.1276	4.9947	7.7654	6.7564	12.6077	10.3457																					CGGA_1666	26.04	10.86	5.24	2.52	2.37	4.79	6.48	2.78	0.25	3.14	8.25
TCGA-HW-A5KJ-01	11.9514	12.2957	10.6921	5.607	7.0796	6.2496	9.7251	10.6641	3.2408	8.2233	9.8107	10.365	5.958	9.9191	7.2353	12.7914	10.6095																					CGGA_1667	32.68	23.13	6.92	0.57	1.63	7.72	14.86	32.04	0.63	5.48	12.42
TCGA-HT-A615-01	10.8336	11.0859	10.7575	6.2497	8.7914	9.0326	10.04	10.5289	3.2457	9.2022	9.2064	9.862	6.5069	6.2657	7.4956	13.1807	10.0553																					CGGA_1669	100.59	157.43	6.5	0.69	3.31	5.31	27.77	21.67	4.55	9.21	36.04
TCGA-HT-8105-01	11.3575	12.1297	11.7115	6.2849	7.7776	7.5981	9.3994	10.6154	2.858	8.8316	10.0877	9.2632	5.1107	9.243	6.8596	12.8892	10.6269																					CGGA_1671	94.84	5.17	5.69	1.4	1.67	8.07	19.42	24.35	2.25	7.47	17.68
TCGA-DU-7309-01	11.522	12.0544	10.7957	6.8244	8.6813	8.3431	9.4873	9.9318	3.1848	8.3008	9.9635	9.2332	4.0758	7.9767	7.2311	12.7675	9.97196																					CGGA_1673	82.32	23.34	5.35	1.09	3.5	3.07	15.06	15.19	1.15	3.45	42.02
TCGA-DU-7301-01	11.6331	11.4822	10.8498	6.996	7.7324	9.0274	9.7379	10.5403	3.0508	9.5597	9.0322	10.1982	5.691	6.5384	6.996	13.3056	9.90936																					CGGA_1675	62.97	34.18	8.33	6.78	4.92	10.99	20.84	11.51	2.7	11.37	18.04
TCGA-HT-7471-01	11.5866	10.4767	11.335	7.3199	8.394	8.6511	10.0248	10.6181	4.5555	8.9427	9.1343	11.2943	5.5724	7.3917	7.5375	12.9816	10.2975																					CGGA_1678	34.2	72.85	6.25	2.07	1.48	4.52	9	8.7	0.28	4.67	5.7
TCGA-DU-6395-01	11.8831	11.8511	10.4876	5.1958	6.9667	8.297	9.8546	10.0317	5.4931	9.4237	9.0636	9.6751	5.168	7.2709	6.4714	13.1972	9.87401																					CGGA_1679	19.42	2.8	1.05	2.86	2.18	2.03	9.24	18.95	0.62	0.36	5.88
TCGA-S9-A6TV-01	11.7213	12.9934	11.222	9.3312	8.9726	9.7525	10.2287	9.4414	6.5458	10.5117	9.4863	10.3997	6.3703	10.6832	8.0282	12.6987	11.9389																					CGGA_1680	74.93	7.1	2.49	12.64	9.19	26.46	61.31	82	6.39	4.83	4.82
TCGA-P5-A5EW-01	11.8164	12.0101	11.4444	5.4881	8.2735	8.6897	9.7427	10.0323	2.7647	9.0868	8.8805	9.6236	4.2328	5.4747	6.7743	12.9182	9.17943																					CGGA_1681	45.02	16.63	0.67	11.92	4.89	16.72	25.75	133.55	7.4	1.94	5.41
TCGA-DU-6408-01	11.8108	12.8681	10.9769	6.2858	8.0031	8.8528	10.1944	10.1729	3.8509	8.6564	9.4318	10.1944	4.0008	7.8948	7.1337	13.0503	10.2496																					CGGA_1686	32.49	41.43	1.5	0.58	2.08	7.27	20.85	30.7	2.3	1.99	4.39
TCGA-DU-8163-01	11.5379	11.546	10.3439	6.8933	9.261	9.7259	10.3457	10.3064	3.4805	9.4397	8.9124	9.8538	5.5145	7.7792	7.7331	13.0164	10.3503																					CGGA_1687	184.77	92.14	2.11	6.25	5.68	13.81	29.95	17.02	15.21	14.39	69.23
TCGA-FG-A4MT-01	11.2703	11.8775	10.5719	3.8833	6.6427	8.2892	10.0724	10.3363	2.9166	9.1588	9.6252	9.9197	3.3464	8.6531	6.4069	12.971	10.5106																					CGGA_1689	62.05	19.57	3.58	0.36	1.83	9.02	29.94	21.47	2.05	7.16	8.44
TCGA-HT-A619-01	11.9762	8.074	10.7272	2.9618	5.5462	6.2931	9.8147	11.0854	3.2634	8.85	9.5382	10.2535	4.7687	7.5579	6.2594	12.6923	9.4679																					CGGA_1690	101.09	236.58	2	4.56	4.58	13.08	18.99	41.9	3.11	9.42	19.03
TCGA-QH-A870-01	10.8276	12.642	10.9428	4.5794	7.176	7.7069	10.2199	10.1235	2.9275	9.2227	8.8634	9.7055	3.5327	5.4212	6.0866	13.1036	9.54268																					CGGA_1693	59.46	3.19	4.84	1.64	2.44	7.28	18.84	63.86	0.74	2.12	6.04
TCGA-HT-A5R9-01	11.9812	11.2361	11.8021	5.3297	7.1643	6.5102	9.5605	10.9639	3.2577	8.1012	9.8569	10.9436	5.5676	8.3082	6.336	12.4727	10.1375																					CGGA_1694	88.34	42.3	0.92	4.3	2.43	9.83	35.14	106.53	6.4	5.66	13.82
TCGA-FG-5964-01	12.0156	10.8235	11.0936	6.4631	7.9004	9.5388	9.8155	10.3442	4.8907	8.4304	9.7101	10.0964	6.0468	8.5722	7.7657	12.7279	10.308																					CGGA_1696	9.46	6.17	0.85	0.62	1.03	2.27	5.64	7.81	0.61	5.47	3.45
TCGA-CS-5396-01	11.421	12.1795	10.7937	3.5902	6.6758	7.0905	10.0763	10.7506	2.4046	9.5012	9.466	9.3487	5.08	9.1472	6.0651	12.9642	10.5924																					CGGA_1698	84.64	56.89	3.68	5.54	3.54	19.39	32.49	78.16	5.29	6.38	9.78
TCGA-DU-A7TA-01	11.5985	11.3568	11.1931	6.3539	7.7002	8.7695	11.0181	10.5647	3.8612	9.0355	8.7457	9.8043	5.5352	7.641	7.2948	13.4312	10.1823																					CGGA_1699	7.15	2.89	3.31	0.26	0.37	1.14	4.22	3.68	0.04	3.43	3.87
TCGA-HW-8319-01	11.5778	13.8232	11.3228	6.0695	8.0026	8.4189	10.1794	10.0319	4.2984	9.0515	9.5939	9.8274	3.0498	8.6052	6.9298	12.8376	10.6378																					CGGA_1700	50.12	5.47	2.5	2.53	2.93	8.04	16.15	37.27	3.46	3.15	8.88
TCGA-DH-A7UR-01	12.0231	10.4661	11.4034	5.1115	8.1526	7.4559	9.7522	10.8147	3.2163	8.7768	10.0405	10.9784	4.4288	8.8328	7.4297	12.7176	10.4754																					CGGA_1701	55.13	3.11	2.93	0.71	0.97	2.54	20.38	40.94	2.55	2.84	5.52
TCGA-TM-A84H-01	11.6634	13.1254	12.2478	5.4648	7.7675	8.1785	10.2929	10.585	2.7663	9.3465	9.3529	9.383	4.0209	5.6004	6.2563	12.8354	9.60541																					CGGA_1703	45.93	25.58	2.42	2.44	1.59	7.97	16.26	26.92	1.63	2.8	5.12
TCGA-S9-A6TZ-01	11.3404	13.8556	11.7805	6.3635	7.8881	8.6476	10.1284	10.6626	3.3739	9.2464	9.2976	9.3922	5.0782	8.2394	7.2903	12.8332	10.6329																					CGGA_1704	43.49	5.71	1.89	1.09	1.85	7.52	15.55	36.21	0.86	1.56	2.97
TCGA-HT-7479-01	11.3534	11.9727	10.3951	5.0861	8.7301	9.6096	10.1448	10.3239	3.4399	9.257	8.5213	9.8477	4.9861	6.2413	7.5532	13.5188	9.74688																					CGGA_1706	55.88	83.59	2.44	10.13	4.74	21.85	27.27	105.98	12.47	8.56	12.58
TCGA-DU-6400-01	11.8996	12.2303	11.9233	5.5033	6.8131	7.2545	9.3563	10.4926	4.6014	9.1451	10.0482	9.6099	5.3374	7.9268	6.3244	12.844	10.1806																					CGGA_1708	145.12	25.05	5.03	8.42	8.71	17.66	53.05	123.89	15.15	6.14	15.48
TCGA-S9-A6WL-01	11.6065	12.0344	10.7289	5.8075	7.5097	7.4138	9.5514	10.6742	4.412	8.4695	9.5788	9.9123	2.8703	10.0706	7.0317	12.8316	10.6147																					CGGA_1709	55.39	119.39	4.16	1.8	6.03	14.08	33.59	29.97	8.08	9.27	22.11
TCGA-DB-A75K-01	11.8831	11.9749	11.4644	7.5393	8.0195	9.0903	10.156	10.164	5.7662	9.6432	9.4525	9.7982	5.529	8.6228	8.2695	12.8472	10.7027																					CGGA_1713	96.33	17.95	3.59	0.89	2.36	5.74	26.65	34.59	0.68	5.94	24.35
TCGA-DB-A4XD-01	11.5738	11.9686	11.1163	3.8936	6.6569	8.2573	9.9652	10.3408	3.3337	9.4763	9.0913	9.5079	3.5843	6.958	6.9072	12.9835	9.78377																					CGGA_1714	42.87	4.29	1.98	1.59	2.94	9.06	16.83	47.2	2.61	1.85	6.48
TCGA-DB-A64Q-01	11.3917	11.062	9.3361	4.3126	6.0494	7.7574	9.7983	10.8638	4.1554	9.4214	9.0005	10.1479	3.0677	6.9834	6.0223	12.9016	9.75829																					CGGA_1715	83.21	14.77	7.95	5.26	2.41	7.47	24.04	26	5.6	8.22	18.91
TCGA-S9-A6WH-01	11.6761	12.1196	11.962	4.9038	7.2121	7.3418	9.6867	10.4165	3.3647	9.0431	9.206	9.8467	4.5048	8.376	6.3323	12.5662	10.1893																					CGGA_1718	64.94	8.63	3.57	2.62	2.31	7.05	20.33	22.4	1.9	5.52	11.65
TCGA-HT-7602-01	11.4968	12.5613	10.5769	6.9609	8.3921	9.6214	9.8584	10.4508	2.5078	8.9926	8.4722	9.7347	4.7083	5.2015	7.1019	13.1921	9.26637																					CGGA_1720	56.76	44.89	11.84	0.53	1.28	3.22	17.35	14.83	0.83	6.91	18.46
TCGA-DU-A5TU-01	11.5856	13.1503	10.9057	8.884	9.0018	10.3232	10.1072	9.5246	3.9829	9.4705	9.2151	10.2604	5.9528	8.9459	8.7905	12.2765	11.0191																					CGGA_1721	29.27	3.55	1.34	1.43	1.82	5.26	14.97	33.47	0.66	1.24	5.83
TCGA-HT-A5RB-01	11.5748	12.09	11.082	5.7086	7.9367	7.7501	9.8979	10.4451	3.9431	8.8979	9.7996	9.3392	3.1937	7.1096	6.6947	12.6943	9.84509																					CGGA_1722	28.14	89.75	0.23	2.61	0.59	4.45	4.33	4.66	0.22	2.3	6.02
TCGA-HT-7616-01	10.9717	12.9406	11.3124	7.1262	8.0173	8.4086	9.7802	11.2632	5.8937	9.785	9.2142	9.921	8.1003	10.5208	8.4684	13.5335	11.7878																					CGGA_1723	59.31	6.99	5.29	1.33	1.35	3.59	20.79	38.41	2.29	3.19	10.48
TCGA-HT-A74O-01	12.1369	11.0376	10.0327	7.5788	8.4623	9.9162	10.0268	9.7731	5.1843	9.8939	8.5272	10.4395	7.1445	8.4583	7.9544	13.115	10.4705																					CGGA_1725	84.12	12.74	3.77	0.56	0.78	3.09	30.36	24.32	1.02	4.22	19.13
TCGA-S9-A7R8-01	10.9984	11.86	11.3433	6.4968	7.2089	8.9247	9.9101	10.5553	3.2968	9.576	9.522	9.6883	4.0956	8.1041	7.2089	12.9024	10.6138																					CGGA_1727	48.7	20.33	2.2	0.52	1.64	6.53	16.9	31.38	2.09	2.99	5.04
TCGA-DU-7304-01	11.4538	13.0794	10.9525	6.0335	8.7866	9.2115	10.1825	10.4058	2.8767	9.3012	10.1781	9.9519	4.7019	6.7285	7.6037	12.8618	10.3839																					CGGA_1728	74.13	27.46	6.11	3.77	4.25	11.03	36.51	8.62	4.19	6.2	28.36
TCGA-HT-8111-01	11.51	12.3343	10.3051	6.7755	8.0564	9.9467	10.1945	10.5979	3.8517	9.0469	9.0039	10.0422	5.756	6.5921	6.9994	13.3817	10.028																					CGGA_1731	83.04	4.3	4.99	2.02	1.56	6.69	25.14	47.48	0.71	2.55	9.5
TCGA-DU-A5TP-01	12.0834	10.4273	11.9779	10.0138	9.587	10.2578	10.1498	10.2393	4.4002	10.1005	9.1977	10.1021	5.5539	5.8797	8.0042	13.5713	9.89674																					CGGA_1735	66.28	38.92	9.21	0.83	3.9	7.31	17.38	15.92	1.29	7.59	35.36
TCGA-HT-7482-01	11.2515	12.171	10.6431	6.6832	8.5048	9.2671	10.3059	10.5983	2.0135	9.0773	8.5063	10.1603	3.4426	6.4272	7.4967	13.5015	9.8046																					CGGA_1736	89.97	193.38	7.7	3.95	4.56	11.53	31.46	43.18	3.8	7.89	20.13
TCGA-HT-7858-01	11.7781	11.3935	10.6317	6.4422	8.42	9.1206	10.013	10.4619	3.6888	9.1905	8.6455	9.8401	6.6159	6.8159	7.2785	13.4003	9.78808																					CGGA_1737	54.16	5.73	3.63	1.14	0.74	3.08	16.71	47.8	2.73	2.17	5.77
TCGA-HT-7475-01	11.5473	11.0353	11.1145	6.4779	8.1658	7.804	9.1962	10.5821	3.7239	9.0547	10.052	10.0493	4.183	8.361	6.844	12.6395	10.3452																					CGGA_1738	75.88	33.58	2	0.9	2.8	14.99	27.25	38.52	3.95	5.64	7.92
TCGA-DB-A64U-01	11.4024	10.6079	11.1897	4.2789	7.6361	8.5958	9.9886	10.7767	3.3513	8.9026	8.6	9.8871	3.4559	6.1381	6.6097	13.008	9.36331																					CGGA_1740	232.92	10.78	1.75	1.2	2.69	4.96	20.5	35.71	1.42	3.02	17.78
TCGA-S9-A6WE-01	11.6644	11.8545	10.9913	3.9007	6.316	7.6833	9.8849	10.303	4.3456	8.9619	9.0117	9.2918	3.9435	9.0756	6.6618	13.2664	10.1824																					CGGA_1743	49.83	10.64	2.8	1.02	3.39	5.45	15.73	17.35	0.94	3.72	29.08
TCGA-DB-A64W-01	11.6671	13.4068	10.6748	5.8976	7.8097	6.572	9.8091	10.6689	2.7597	7.7183	10.419	11.3529	2.9375	10.4372	5.7507	13.0998	11.1013																					CGGA_1744	55.45	53.96	2.1	2.57	3	8.31	28.16	45.39	5.61	3.35	6.87
TCGA-R8-A6MO-01	11.6375	12.3815	11.2143	5.4402	6.6725	8.9163	9.7781	10.6342	5.4198	8.9099	9.2644	9.7931	5.0856	7.8019	7.1402	12.5351	10.1976																					CGGA_1745	9.87	6.08	2.67	0.44	0.66	0.78	2.26	2.39	0.03	3.29	11.31
TCGA-DU-5872-01	10.7658	14.7674	10.4594	6.1795	8.0577	8.7501	9.7202	10.1297	3.11	9.2126	9.3222	9.7255	6.2535	8.4197	7.517	13.2263	10.9431																					CGGA_1747	50.82	4.27	2	6.71	6.55	17.17	25.85	40.75	1.27	2.07	3.54
TCGA-HW-8322-01	11.6638	10.5932	11.272	5.5501	6.8258	7.5762	10.3627	10.6242	3.3297	9.2819	9.136	10.3912	5.0626	7.4053	6.8071	12.9587	10.0447																					CGGA_1749	148.4	124.69	5.61	3.28	6.32	7.91	26.27	25.11	5.79	7.08	26.05
TCGA-CS-6668-01	10.8709	10.5976	12.3463	3.7302	6.0906	6.571	9.561	10.7714	2.835	9.0747	9.52	9.3344	4.1734	5.9859	5.3413	12.7949	9.46119																					CGGA_1750	44.55	14.71	2.43	1.77	4.7	10.06	16.71	20.26	1.85	4.58	28.45
TCGA-DU-5870-01	11.5721	12.0302	10.5766	4.1173	6.475	8.1614	10.0909	10.6648	3.6167	9.0503	9.068	9.667	4.4646	7.4459	6.0216	13.3146	9.92405																					CGGA_1758	79.5	73.28	3.01	1.76	5.13	6.44	26.46	1213.24	3.76	7.79	29.39
TCGA-FG-7636-01	12.1118	12.5486	10.6567	5.993	7.1729	8.7724	9.8089	10.4244	4.7093	8.8016	9.1524	9.6814	3.7406	6.1996	6.1485	13.0473	9.37702																					CGGA_1764	43.58	57.74	4.36	1.63	2.38	4.28	27.91	24.11	2.12	6.48	13.9
TCGA-HT-7692-01	11.7298	12.5586	9.8947	5.026	6.5405	7.9203	10.1309	10.866	3.9145	7.8625	9.1164	10.3934	4.6856	6.6484	6.2472	12.7615	9.54085																					CGGA_1767	26.4	19.2	1.29	1.51	1.42	3.63	6.99	5.11	0.14	2.69	10.53
TCGA-FG-8187-01	11.3348	12.7213	10.6706	5.6455	7.3436	8.762	9.8515	10.6088	5.0749	9.1258	8.9114	9.9636	3.9313	6.9525	6.798	13.2253	10.018																					CGGA_1769	34.98	45.33	6.92	1.33	4.1	8.5	8.78	14.97	0.69	4.35	45.27
TCGA-HT-7877-01	11.405	11.3688	11.404	5.8061	7.7074	7.758	9.9314	10.2649	3.3665	8.9182	9.3981	9.5771	4.2718	7.716	7.0172	13.0502	10.019																					CGGA_1780	21.63	62.69	0.85	0.55	1.72	3.67	5.61	210.64	0.1	2.64	4.18
TCGA-R8-A6ML-01	11.4331	11.5197	11.5283	3.4151	5.027	6.5877	9.9344	10.4548	3.8833	9.251	8.9044	9.5303	4.889	7.4544	5.3499	13.097	9.7828																					CGGA_1791	13.6	36.68	2.31	2.13	1.59	3.63	4.79	34.97	0.29	3.28	6.08
TCGA-HT-7686-01	11.7026	12.467	10.9439	8.2008	9.37	10.6706	9.7843	9.8458	3.0553	9.6679	9.1993	10.1598	5.8221	8.5052	7.9888	12.8688	10.7731																					CGGA_1807	81.09	81.14	8.81	0.88	1.76	4.64	14.11	68.68	1.04	4.26	26.17
TCGA-DU-6410-01	11.7585	10.6465	11.4489	4.726	6.4591	6.4591	9.3292	11.3522	1.5774	7.9233	9.8935	10.4997	1.9915	7.3016	5.6036	13.039	9.45692																					CGGA_1809	64.38	24.97	3.36	2.05	1.89	10.34	24.34	128.67	1.65	5.26	15.82
TCGA-S9-A6U9-01	11.6506	12.9523	10.2283	5.6344	8.2599	9.7217	10.5039	10.3489	4.0375	9.5644	9.0023	9.4958	5.3744	9.1393	8.2622	13.5097	10.8389																					CGGA_1812	80.81	42.95	3.45	2.87	4.65	11.5	30.88	89.8	5.35	5.35	15.27
TCGA-CS-6290-01	11.7181	12.665	10.4866	7.6757	9.3599	10.4766	10.242	10.1726	3.5579	9.5453	8.8884	10.1025	6.1018	6.7765	8.0744	12.8857	10.2234																					CGGA_1817	45.24	6.3	3.92	1.12	2.69	13.37	39.31	54.43	3.37	6.32	13.39
TCGA-DU-7019-01	11.3719	12.7201	10.7858	5.7526	7.8618	8.4183	9.6349	10.4577	3.1134	9.0209	9.738	9.8509	5.1676	8.1659	7.1406	13.0342	10.482																					CGGA_1819	77.35	97.93	10.44	10.93	1.84	19.87	23.55	145.03	3.32	6.17	16.76
TCGA-FG-A711-01	11.6921	12.2304	10.3522	5.4873	7.7277	8.7362	10.2509	9.8314	2.836	8.8406	9.5064	9.8112	2.3067	6.4277	6.36	12.6072	9.58637																					CGGA_1826	93.09	162.83	6.06	0.9	3.7	6.4	23.03	24.81	5.41	10.85	17.03
TCGA-DB-5275-01	11.5367	12.8764	11.1851	6.1762	6.8741	8.2396	9.8124	9.9831	3.1696	9.1729	9.4175	10.0275	4.7897	7.6978	6.2602	13.2891	10.2546																					CGGA_1829	44.72	19.77	3.03	1.35	3.07	5.37	10.57	24.01	2.64	3.12	68.55
TCGA-S9-A7R4-01	11.617	12.792	10.8809	6.4297	8.3774	8.6556	10.2141	10.236	3.8112	9.1068	8.9928	9.6388	4.5162	8.6983	7.768	12.6612	10.4711																					CGGA_1833	113.55	255.35	4.79	1.6	11.01	4.24	22.5	16.33	5.55	9.18	25.09
TCGA-E1-5318-01	11.851	10.0589	11.9558	3.4299	6.6532	8.0436	9.2873	10.6119	2.5579	9.0419	9.5745	9.6913	3.7451	7.336	6.2231	13.6363	9.58758																					CGGA_1840	58.03	32	3.02	1.48	6.13	6.39	13.33	157.12	1.16	5.09	64.12
TCGA-HT-7676-01	11.9922	11.1282	10.4878	7.8195	8.498	9.9609	9.9614	10.489	4.2485	9.3821	9.227	10.2535	3.9074	8.6101	8.0307	13.5519	10.469																					CGGA_1850	73.67	15.91	3.77	0.62	2.95	7.95	19.52	16.79	1.48	5.49	10.52
TCGA-S9-A7J3-01	11.6464	11.2966	11.6057	5.127	7.3534	8.5921	9.955	10.5634	4.1208	9.2307	9.0878	9.4835	5.0539	7.1696	6.9183	12.5597	9.86692																					CGGA_1854	52.53	16.86	4.12	0.46	2.36	10.24	17.42	41.63	0.59	3.87	7.39
TCGA-DU-A6S2-01	11.3602	11.1952	11.2344	6.3184	7.9957	7.3414	9.4875	10.2024	3.5467	9.3096	10.0361	8.5661	4.7926	7.0722	6.1478	12.6677	9.78883																					CGGA_1862	103.55	29.96	6.36	0.46	2.39	4.12	25.09	28.77	2.44	11.78	23.35
TCGA-P5-A5F2-01	10.776	14.4813	11.022	5.6725	7.6511	8.1186	9.9485	10.2132	3.1975	9.1579	10.0009	9.7363	3.1198	6.9269	6.7319	12.9761	10.4669																					CGGA_1866	52.4	131.5	3.39	1.39	2.61	3.97	27.96	18.16	5.2	10.53	22.77
TCGA-E1-5304-01	12.0146	12.7905	11.9315	4.1325	5.2725	7.7336	9.7808	10.4676	2.3848	8.3863	10.1932	12.4057	3.44	10.8513	4.2439	12.8838	11.4098																					CGGA_1870	62.75	6.54	3.57	0.68	1.67	2.52	14.83	26.41	0.39	2.83	13.6
TCGA-TM-A84S-01	11.5121	12.1504	10.84	5.4911	7.7142	8.5155	9.9894	10.6467	4.4795	9.0377	8.9412	10.2903	5.4911	5.9901	6.4225	13.2418	9.73968																					CGGA_1875	54.58	7.03	2.19	9.71	5.75	17.59	20.41	144.23	10.85	2.41	7.13
TCGA-CS-4943-01	11.789	11.1285	11.4795	5.9612	7.605	8.8001	9.7938	10.3552	2.71	8.2336	9.8294	12.0428	4.9235	7.7388	6.9534	12.7182	10.3795																					CGGA_1882	36.37	5.39	2.02	0.71	1.1	5.18	19.37	44.98	0.03	1.54	5.71
TCGA-QH-A65Z-01	11.6488	10.6304	11.4232	5.3655	7.2256	7.3194	9.674	10.8321	4.2424	8.6509	8.901	9.9716	4.2424	6.7271	5.7524	13.1618	9.43156																					CGGA_1901	43.2	56.32	1.72	11.57	4.64	20.04	33.71	75.29	9.91	6.81	7.09
TCGA-P5-A730-01	11.4275	12.3339	10.5471	4.5446	6.0978	7.7945	9.7841	10.5712	3.3263	9.4248	8.8035	10.1431	3.9316	8.6969	6.8284	13.356	10.3994																					CGGA_1902	42.42	7.7	3.09	0.55	1.95	3.99	28.79	55.18	1.23	2.58	6.71
TCGA-TM-A84L-01	11.6195	11.992	10.2845	6.0457	8.9243	9.3826	10.4448	10.2294	4.1976	9.3198	8.7185	9.6508	5.3405	6.9131	7.8419	12.642	9.95471																					CGGA_1903	15.7	3.09	1.62	2.28	4.55	2.6	31.34	49.69	3.97	1.11	1.09
TCGA-S9-A6UB-01	11.6161	10.3513	11.9867	2.9162	6.0644	7.3638	9.5867	10.611	3.8613	8.7676	9.3476	10.2432	2.9973	6.4358	5.1493	12.6606	9.38509																					CGGA_28	48.59	24.34	1.54	0.71	0.66	4.53	9.76	27.81	0.54	1.41	6.97
TCGA-DB-5276-01	11.4299	13.2054	10.3703	7.5614	8.9889	9.6766	9.726	10.3185	3.1917	9.1739	9.3305	9.6457	5.2889	8.6022	7.5472	13.4481	10.6702																					CGGA_290	37.04	45.44	12.58	0.91	1.84	2.81	14.22	27.69	1.02	6.96	23.19
TCGA-DB-5273-01	11.7195	12.8129	9.9962	7.1572	8.1935	9.8918	10.0003	9.8275	4.3265	9.3644	9.1694	10.1435	4.7385	8.9367	7.1655	13.4466	10.7385																					CGGA_320	69.75	42.33	4.3	0.99	2.28	5.09	18.07	8.7	1.94	5.52	27.35
TCGA-TM-A7C4-01	11.5269	12.9857	10.3245	6.4289	7.5271	7.6228	9.9538	9.9964	3.5491	8.0695	10.9676	9.4568	3.1352	8.0136	6.856	13.4034	10.2512																					CGGA_42	71.54	22.09	5.09	0.59	1.51	11.02	18.42	43.53	1.05	6.49	9.9
TCGA-DH-A66F-01	11.4729	12.8751	11.1238	3.5124	6.0408	7.2919	9.8552	10.8611	2.3949	8.6891	8.6488	10.0731	3.5124	8.3303	6.3892	13.3384	10.0481																					CGGA_474	151.02	24.81	0.53	0.85	0.81	2.11	14.35	42.02	4.73	5.65	15.23
TCGA-HT-7607-01	11.1337	12.294	10.5748	7.2592	8.509	8.5036	9.2695	10.1777	2.5145	8.708	10.3145	9.4082	4.5164	8.0966	6.9686	12.9827	10.3746																					CGGA_482	63.31	10.74	4.41	0.94	2.58	7.14	28.51	21.23	1.04	7.26	12.64
TCGA-DU-6393-01	11.6824	12.2629	10.9244	3.3647	6.6016	6.7088	9.6886	10.5646	4.3118	9.0417	9.7409	10.2672	3.567	6.951	5.7048	12.8218	9.85919																					CGGA_503	72.89	27.05	4.28	1.19	3.97	5.55	15.85	9.28	1.16	4.5	40.39
TCGA-QH-A6XA-01	11.5953	11.8833	10.4404	4.9886	7.374	8.5623	10.1452	10.2397	3.3093	9.0594	8.813	9.802	3.5478	7.157	7.02	13.3566	9.7661																					CGGA_509	94.55	465.64	7.07	0.89	4.16	5.57	29.51	1085.28	1.6	13.72	19.96
TCGA-CS-6665-01	11.6665	12.2699	10.5135	9.4662	9.6917	10.7079	10.2318	10.6402	3.3909	9.6533	9.0183	10.3797	6.3516	9.4766	8.3578	13.093	11.2369																					CGGA_521	66.3	81.7	3.73	6.29	7.03	16.92	30.46	12.7	2.16	9.05	15.75
TCGA-S9-A7IY-01	11.6236	12.007	11.1935	5.8479	8.7162	9.1858	10.1066	10.3648	4.6887	9.0562	9.1765	9.7626	5.3817	7.0744	7.288	13.0136	10.0618																					CGGA_583	10.91	3.47	2.03	0.18	0.49	0.76	2.68	1.79	0.04	1.75	1.33
TCGA-P5-A5EV-01	11.4542	12.278	10.4403	4.9062	7.8408	8.9335	10.1253	10.0718	2.8153	9.2652	9.6491	9.3071	5.5009	6.7932	7.2049	13.1798	9.98601																					CGGA_634	67.18	23.66	5.68	1.42	2.97	5.07	14.42	12.12	0.6	4.89	30.67
TCGA-HT-7874-01	11.1691	12.2563	11.1264	7.1438	8.2604	7.9541	9.2147	9.9701	2.1214	8.3266	10.3315	9.1498	3.3289	8.0881	6.9025	12.7967	10.0977																					CGGA_663	51.63	18.57	6.15	1.14	4.64	3.93	14.23	11.46	0.31	3.75	25.69
TCGA-HT-7470-01	11.3829	12.7451	11.2119	6.2013	8.4582	8.9199	9.6468	10.0021	3.6509	8.7201	10.4432	9.5684	2.6915	6.6051	6.6287	12.906	9.97397																					CGGA_705	84.43	52.8	7.6	1.71	4.37	6.44	26.4	13.31	0.77	7.49	15.21
TCGA-DU-7009-01	11.4073	11.4706	10.8051	4.7137	7.2634	7.4707	9.6839	10.5092	3.1396	8.8384	9.3181	10.0513	2.8699	6.8776	6.3115	13.2207	9.66917																					CGGA_707	74.18	71.38	7.52	1.03	3.36	5.11	17.72	10.81	1.24	5.86	22.18
TCGA-FG-A4MY-01	11.2364	12.7428	11.408	5.5818	7.0838	8.7178	9.5787	10.3961	3.8478	9.1024	9.1371	9.8224	4.6885	8.7718	6.8524	12.7213	10.5891																					CGGA_721	71.35	41.48	4.37	2.31	4.56	11.07	14.79	8.59	0.53	6.44	45.11
TCGA-TM-A7CF-01	11.4961	12.81	10.8791	6.0831	7.7421	7.8321	9.8958	9.7039	3.7164	8.7142	10.5846	9.4891	2.7049	7.87	7.0605	13.105	10.2678																					CGGA_809	66.51	42.81	3.99	0.71	2.74	10.34	25.68	17.3	1.63	8.03	11.86
TCGA-FG-8186-01	11.5505	11.9387	10.4762	6.2301	7.9996	8.5697	10.2095	10.2703	4.1036	8.9229	9.3119	9.5944	5.4615	6.9897	6.7931	12.9824	9.92991																					CGGA_831	81.49	229.54	5.8	2.23	2.96	6.47	30.29	30.35	2.95	9.19	14.65
TCGA-S9-A6U6-01	11.9289	13.6202	10.5307	5.7959	7.1761	8.3378	9.9499	10.0983	4.125	9.3578	10.1577	9.4417	3.748	7.1189	6.6509	12.4339	10.1003																					CGGA_852	44.98	127.81	2.83	1.66	2.48	15.36	25.31	35.66	3.09	7.36	16.5
TCGA-S9-A7QZ-01	11.5239	11.7124	11.3853	5.2418	7.0433	6.791	9.9395	10.3721	4.3914	8.7181	9.5981	9.4548	3.9173	7.0645	6.5346	12.3871	9.70937																					CGGA_861	82.24	103.67	4.59	2	6.79	16.12	25.26	15.07	1.36	6.3	15.81
TCGA-CS-5390-01	11.5529	12.1847	11.2873	5.0016	6.384	7.3626	9.554	10.7737	3.964	8.678	9.7667	10.3133	3.8948	7.3754	6.0362	12.7394	10.0164																					CGGA_863	40.36	44.78	5.39	0.76	2.79	18.05	18.85	19.26	0.5	7.42	7.82
TCGA-S9-A6U2-01	11.4873	11.2969	10.6635	5.0929	7.5829	8.0243	10.2489	10.8706	3.5711	9.1045	8.8707	9.8149	3.9258	7.3049	6.3311	13.1933	9.88653																					CGGA_889	56.66	10.21	5.11	1.56	3.11	2.48	8.67	13.44	1.31	3.71	28.89
TCGA-S9-A6WN-01	11.7267	14.8034	10.1444	8.4517	7.5832	9.2651	10.1958	11.0952	4.8649	9.5281	9.4036	9.9926	6.2546	8.0665	8.1342	14.2625	10.8976																					CGGA_890	109.52	40.44	8.23	0.31	1.47	4.24	32.41	15.36	1.6	6.6	10.69
TCGA-DU-7294-01	11.5435	11.4019	11.5604	4.4452	6.1236	7.5133	9.7994	10.9315	2.8144	8.2577	8.8015	9.9305	4.1232	6.3539	5.5626	13.0924	9.25092																					CGGA_901	129.25	62.5	8.39	1.66	2.12	5.8	25.85	9.27	1.28	6.26	18.83
TCGA-HT-7609-01	11.7923	12.7792	11.2327	5.8821	7.6595	9.0161	9.88	10.2314	2.5989	9.0651	8.6943	9.6803	4.2402	7.0458	6.6245	12.754	9.73446																					CGGA_903	65.03	157.33	7.88	2.79	1.65	9.54	18.81	14.57	1.26	6.73	11.93
TCGA-DU-8168-01	11.5085	15.0632	11.4237	4.666	6.2575	5.8634	9.7009	10.6018	2.0174	8.5723	9.4946	10.602	3.5301	7.404	6.5985	12.8126	10.1209																					CGGA_D28	75.32	65.39	6.76	0.2	1.12	4.52	17.3	31.72	0.93	7.77	11.43
TCGA-QH-A6X3-01	11.3899	12.6982	10.368	3.5966	5.8088	7.2201	10.0503	10.4251	2.8022	9.1351	8.5987	10.0796	4.0325	7.0494	6.7623	13.1537	9.76154																					CGGA_J73	112.6	17.17	9.96	1.01	5.65	4.09	25.85	12.71	0.56	4.84	41.54
TCGA-DU-6401-01	11.7097	13.8285	11.9671	5.0241	6.7654	7.8238	9.3874	9.8036	2.3197	9.2188	8.636	9.4189	4.8353	9.2304	7.4185	12.4974	10.3331																					CGGA_P100	87.78	71.94	2.16	1.73	2.92	6.09	19.62	59.36	6.67	3.82	11.94
TCGA-DU-6396-01	11.104	11.3994	11.5919	8.9883	9.7688	10.6165	10.1514	10.3889	4.0621	9.8048	8.5971	9.4757	6.8404	8.1766	8.3193	12.9901	10.7403																					CGGA_P102	108.21	70.5	5.36	4.4	9.56	9.89	32.98	33.99	3.09	9.18	25.26
TCGA-DU-7306-01	11.6049	13.4087	10.822	5.4942	6.7782	8.3017	9.5724	10.1058	2.6759	9.48	9.2492	9.9549	4.8372	7.6764	6.7948	12.878	10.2304																					CGGA_P103	55.85	29.37	9.16	0.69	3.32	2.41	17.98	12.47	0.43	4.73	38.48
TCGA-DH-A7US-01	11.6703	11.4095	10.935	4.0995	7.2435	8.5292	10.1283	10.6035	3.8798	9.0847	8.8207	10.0459	4.3484	6.2491	6.0872	13.0467	9.55174																					CGGA_P108	82.88	40.27	11.75	2	7.99	7.86	20.39	17.76	1.58	6.79	28.58
TCGA-FG-A87N-01	12.1226	11.4155	10.1222	7.5414	7.9048	9.1212	10.0102	10.8931	3.0724	9.4538	10.0006	10.0482	3.6847	11.863	7.1925	13.3864	11.5178																					CGGA_P110	69.29	14.81	9.59	0.92	6.63	3.89	15.55	29.38	0.62	8.12	31.68
TCGA-HT-7478-01	11.6886	13.4209	10.4774	8.5495	9.2597	10.4589	9.8041	9.6664	4.516	9.6536	9.3486	10.0299	7.2228	8.2295	8.0289	12.5754	10.8502																					CGGA_P111	60.56	18.03	9.42	0.73	4.5	5.9	20.02	17.2	0.63	5.86	21.39
TCGA-DB-A4XE-01	11.4985	11.6138	10.6901	5.4741	7.4609	8.321	9.8814	10.1506	2.3551	8.4473	9.1788	10.4053	2.7961	8.2641	6.0631	12.7061	10.0591																					CGGA_P112	40.56	35.05	5.78	2.18	5.76	6.52	13.24	19.59	0.83	4.09	55.65
TCGA-DB-A64L-01	10.8302	10.9862	11.0742	7.2768	7.9562	7.8412	9.0799	10.7842	3.362	8.7397	10.6101	9.6059	5.9602	7.3024	7.2811	13.103	10.2998																					CGGA_P113	39.71	15.02	4.34	1.42	6.93	4.52	9.74	4.99	0.8	3.42	35.89
TCGA-VV-A829-01	10.9377	12.1207	11.5239	4.3346	6.7751	8.1711	9.5047	11.061	3.1296	9.3626	9.7479	9.4957	5.4675	9.2482	6.748	13.0713	10.9275																					CGGA_P115	13.42	4.62	2.95	2.18	1.68	3.95	5.86	25.9	0.09	1.99	9.95
TCGA-DH-A66B-01	11.8025	12.9578	11.2171	8.761	8.7527	9.7263	10.0515	10.2895	3.3481	9.6063	8.3158	10.784	6.2583	7.9278	7.9884	12.4877	10.5456																					CGGA_P116	14.68	19.24	2	1.05	0.77	3.79	3.91	3.03	0.38	2.23	5.76
TCGA-FG-8182-01	11.6379	11.7071	10.6242	5.125	8.6084	9.4946	10.2255	10.4234	2.5344	9.3477	9.1497	9.6938	4.3097	6.8065	7.5436	12.8909	9.89654																					CGGA_P121	30.59	2.79	1.32	3.04	3.19	6.23	7.13	32.38	0.79	1.35	11.42
TCGA-HT-7603-01	11.31	11.4514	10.2322	7.3671	7.5023	7.5304	8.3165	10.395	2.7033	8.2068	10.3894	9.5047	3.0804	7.4657	6.7022	13.2603	9.65229																					CGGA_P128	61.07	21.18	8.39	0.95	5.63	5.99	18.59	11.67	0.48	4.83	23.94
TCGA-DU-6397-01	11.3424	12.0128	11.3479	4.1653	6.7887	7.6369	9.8544	10.3542	3.4315	8.6698	9.146	9.6219	4.9245	10.2727	6.8131	13.3712	10.7517																					CGGA_P13	57.95	23.41	7.23	0.83	2.32	2.75	18.79	19.54	0.81	4.64	24.82
TCGA-DU-5853-01	11.7044	12.2215	11.1686	6.8693	8.8908	9.3509	10.1024	10.33	4.9012	8.8767	9.2069	9.865	6.6926	6.9524	7.9578	12.8226	10.0879																					CGGA_P131	38.29	19.45	7.4	0.82	3.46	4.25	20.28	17.52	0.32	8.65	31.07
TCGA-CS-6670-01	11.6733	12.8937	11.1675	5.7942	7.4696	8.0691	9.4403	10.3586	3.7443	8.9768	10.2726	9.7559	2.4619	8.4408	6.6895	12.6589	10.4099																					CGGA_P132	36.88	20.92	4.74	0.74	2.59	4.76	22.3	13.93	0.56	7.21	13.79
TCGA-DB-A64P-01	11.5275	12.1777	10.4761	5.1852	6.9737	7.8674	9.5112	10.5293	3.36	8.8367	8.9903	10.7326	4.2243	8.3175	7.1637	13.2064	10.2535																					CGGA_P136	13.87	12.5	2.5	0.75	1.14	2.55	7.08	7.43	0.44	1.77	6.43
TCGA-HT-A5R7-01	11.3589	11.8718	10.4881	6.7517	8.4883	8.5723	9.3959	10.0308	3.7493	8.4354	10.2966	9.5723	3.7998	9.3233	6.8205	12.7134	10.602																					CGGA_P137	76.71	21	7.48	0.27	1.97	4.03	23.47	12.67	0.6	6.7	14.64
TCGA-HW-A5KL-01	11.8893	11.2403	10.9562	4.9936	8.071	8.9735	10.3841	10.2054	3.2351	8.9202	8.9355	9.4883	4.3672	6.0745	7.4076	12.665	9.33265																					CGGA_P142	51.36	29.84	4.26	0.41	3.76	7.57	19.46	19.09	0.79	6.01	9.7
TCGA-HT-7474-01	11.2767	12.7222	10.4394	6.5553	8.3719	8.32	9.369	9.8351	2.9538	8.4806	9.6669	9.68	4.3091	7.6404	6.6193	13.1035	10.0352																					CGGA_P143	78.39	495.27	5.35	3.55	7.59	11.23	26.44	17.65	17.17	14.68	25.18
TCGA-DH-A7UU-01	11.8418	14.1421	11.1418	5.2122	7.9458	8.696	10.4181	10.4857	3.8979	8.8909	9.4464	10.8932	3.1412	8.2078	7.5335	12.6521	10.6636																					CGGA_P144	37.67	42.86	7.44	1.77	5.5	7.43	17.54	11.8	0.78	7.69	33.58
TCGA-QH-A6CZ-01	10.7632	10.2026	10.5751	5.5248	7.0971	6.8303	9.7574	10.2491	3.604	8.6235	9.319	9.4871	2.1976	7.5417	5.4212	12.8224	9.72887																					CGGA_P145	49.35	21.4	3.13	0.59	3.44	12.85	19.38	18.81	0.2	6.87	11.82
TCGA-DH-A669-01	12.0238	12.3079	9.9713	6.4098	7.3944	8.5634	10.5939	11.493	5.1648	8.7986	10.1946	12.1027	6.5347	7.9693	6.3333	13.4755	11.0062																					CGGA_P147	75.55	41.96	5.8	1.48	6.22	10.48	23.28	23.47	0.65	7.96	17.51
TCGA-DB-A75L-01	11.6576	11.2068	10.5228	6.8862	7.3415	8.7139	10.1981	10.3332	3.697	9.2812	9.2821	10.1478	4.416	8.0996	7.6066	12.6356	10.3052																					CGGA_P15	49.76	5.48	2.56	2.59	4.99	7.93	23.5	32.71	0.94	2.53	4.94
TCGA-P5-A5EZ-01	11.161	12.5918	11.0741	6.1159	8.3494	9.9123	10.1718	10.3581	2.7433	9.4681	9.5129	10.4023	6.9368	7.4332	7.3263	12.5975	10.7614																					CGGA_P151	48.42	31.45	2.81	0.99	3.57	5.17	15.96	17.02	2.68	2.59	18.66
TCGA-DU-5871-01	11.5366	13.3573	11.1971	6.4653	8.1126	9.0094	9.8504	10.3769	2.1781	9.5739	8.9739	9.8418	5.0667	7.2046	6.922	12.8783	10.2048																					CGGA_P153	18.29	8.56	2.97	0.36	1.22	2.1	2.54	1.77	0	2.33	5.09
TCGA-WY-A858-01	11.3186	13.4438	10.4977	8.2991	8.5953	9.9723	10.3495	10.364	3.7612	8.9823	9.0143	10.3653	6.0354	9.0875	8.5314	12.9597	11.0783																					CGGA_P155	107.84	89.03	6.24	1.07	7.1	6.91	17.92	17.08	4.28	4.81	25.86
TCGA-VM-A8CB-01	10.8014	10.8052	11.1853	4.8083	6.6852	6.731	9.5919	10.2866	2.521	8.6913	9.8931	9.645	3.7864	7.3071	5.7057	12.9274	9.90811																					CGGA_P156	75.32	10.1	5.66	0.65	3.27	4.58	17.24	13.68	1.12	5.91	22.69
TCGA-HT-7483-01	11.5138	13.0241	10.672	5.5766	7.3921	7.8719	9.6406	10.0602	3.9189	8.9376	8.9754	10.4386	3.4302	7.9564	6.4463	13.0437	10.1743																					CGGA_P157	62.45	93.07	4.68	2.2	4.82	10.02	22.95	18.62	3.08	10.86	24.33
TCGA-HT-7687-01	11.6871	11.118	11.5109	5.5248	7.1762	7.9156	9.7978	10.5765	3.9905	8.7076	9.7003	9.858	5.7315	7.8682	6.7372	12.8496	10.1043																					CGGA_P158	18.24	2.46	3.98	0.18	0.23	0.9	3.31	2.19	0.03	0.99	1.06
TCGA-TM-A84G-01	11.9374	10.8287	12.1705	3.3886	6.7681	6.1207	9.8412	10.5299	2.6565	8.7094	9.0026	9.7622	3.8342	7.764	5.441	12.5108	9.52126																					CGGA_P159	58.77	466.26	5	1.13	3.84	7.14	34.02	16.5	2.35	7.91	21.96
TCGA-E1-A7Z6-01	11.6548	12.73	11.7142	4.5878	7.8191	8.3405	9.9529	10.2197	2.7321	9.187	9.031	9.6892	2.2518	8.8472	7.021	13.0782	10.3407																					CGGA_P160	69.04	115.73	3.81	9.46	15.53	26.41	23.88	36.37	5.65	13.08	21.19
TCGA-TM-A84I-01	11.2597	12.5428	11.3369	7.0169	7.416	8.5958	10.3191	10.2996	3.1356	9.2801	9.4947	11.4955	3.7507	8.5958	6.8369	12.5813	11.0494																					CGGA_P164	24.01	53.91	2.82	0.77	1.87	3.68	5.2	10.55	0.12	4.96	5.38
TCGA-CS-5394-01	11.5241	11.2042	11.1051	2.2266	5.497	6.1137	9.4482	10.9373	2.7415	8.7046	9.0579	9.8659	2.6674	6.7778	5.5183	12.8507	9.25485																					CGGA_P165	24.42	3.25	1.28	0.43	0.59	1.22	5.51	2.77	0.07	1.51	6.41
TCGA-DU-A76O-01	12.2372	11.9229	10.1238	7.6591	8.8174	10.0555	10.2889	9.8707	3.8427	9.0048	9.2272	9.7579	5.453	6.9582	8.4469	12.6655	9.81186																					CGGA_P17	41	24.18	6.68	0.94	3.49	10.67	22.56	13.5	0.57	8.73	18.65
TCGA-DU-A5TW-01	11.3522	12.068	10.5633	3.7893	7.4533	8.1634	10.2759	10.2723	1.8693	9.3682	8.6876	10.1479	3.963	8.3971	6.9224	12.8863	10.3352																					CGGA_P172	15.22	10.67	6.18	1	1.8	2.33	4.8	2.97	0.1	2	7.26
TCGA-FG-5962-01	11.4896	11.5316	10.6795	6.5203	7.5834	7.8388	9.6272	10.3646	4.0492	8.3106	10.0443	9.7605	3.9341	7.1232	6.8688	12.9913	9.8051																					CGGA_P173	60.02	36.72	6.05	1.24	9.35	14.99	27.94	13.54	0.04	9.15	11.22
TCGA-19-1787-01	11.6259	13.824	9.7022	7.7339	8.1989	10.2595	10.0679	10.9169	6.3569	9.2868	10.9575	12.2469	6.7349	9.8388	8.1319	12.6826	12.246																					CGGA_P174	69.34	33.98	10.26	0.72	3.53	4.6	21.31	20.71	0.88	5.77	13.58
TCGA-32-2616-01	11.4821	15.96	8.7457	6.3172	8.2849	8.9876	10.298	10.892	5.254	9.5252	10.029	11.6437	6.4075	14.0393	7.6416	13.407	13.3632																					CGGA_P176	71.76	12.81	9.95	1.17	3.62	2.76	19.22	13.1	0.63	6.11	25.66
TCGA-19-4065-01	11.8787	15.0683	9.5585	7.9295	8.4599	10.2729	10.3209	11.1779	5.1951	9.5891	10.0551	11.2576	7.3018	13.2519	8.1312	13.6214	13.0445																					CGGA_P177	58.28	24.29	4.67	2.27	6.38	9.52	24.51	541.69	2	9.31	15.2
TCGA-06-5416-01	10.9611	13.0192	8.1266	5.8663	7.8002	9.3921	9.3081	10.5085	5.4161	8.974	9.9159	11.7282	5.7109	13.352	5.9555	14.2447	12.681																					CGGA_P178	8.06	5.73	1.58	1.36	0.71	1.19	1.94	3.51	0	1.72	11.13
TCGA-HW-7493-01	11.3482	13.1653	10.6395	6.7672	8.2837	8.836	9.576	10.0988	2.627	9.1929	10.3952	9.6299	5.754	6.8139	7.1209	13.2778	10.2947																					CGGA_P179	54.02	32.53	10.32	1.1	4.59	9.86	17.77	11.95	0.29	5.08	30.59
TCGA-DU-7014-01	11.5399	13.6457	10.9026	5.6014	6.9896	8.297	10.2264	10.3761	2.0242	9.3267	8.5763	9.6573	4.6748	9.3024	7.3566	12.857	10.6219																					CGGA_P18	66.26	63.2	9.2	0.25	3.46	5.16	17.55	9.35	1.31	12.73	14.22
TCGA-27-1832-01	11.3719	13.126	8.4329	9.3149	8.5815	10.0845	10.5133	11.6452	7.4906	9.6413	9.9929	11.7948	7.7993	13.2335	9.2066	14.263	13.263																					CGGA_P180	30.62	52.43	2.71	1.73	3.15	6.16	9.11	5.01	0.44	1.94	9.18
TCGA-27-1831-01	10.292	11.8015	7.7955	7.7353	7.9088	10.0708	10.0796	11.7342	8.8883	8.3925	9.7785	12.1946	6.1189	13.3396	7.8429	13.3232	13.0868																					CGGA_P181	62.96	33.96	5.73	2.02	9.18	18.37	27.35	21.7	0.35	8.79	12.91
TCGA-28-5216-01	11.2254	15.9475	8.7122	7.1555	8.0628	9.426	10.1188	10.3849	4.0908	9.398	10.0868	10.7311	6.9429	14.0873	7.3895	14.1128	13.2188																					CGGA_P183	74.09	10.35	7.27	0.24	1.79	2.15	22.26	18.63	0.26	7.21	19.02
TCGA-16-0846-01	11.6722	13.7694	9.2395	8.2541	8.6434	9.6924	10.012	10.26	6.6866	9.1751	9.8874	10.5564	7.8612	10.5152	7.6674	12.46	11.7598																					CGGA_P19	65.82	24.29	6.72	0.58	4.71	8.57	21.03	11.6	0.9	6.77	16.47
TCGA-28-5218-01	11.6207	17.2221	9.1808	9.5956	9.1053	9.9581	10.1923	10.6673	8.0047	10.4245	10.6765	10.92	8.3014	14.2099	9.403	14.7334	14.0028																					CGGA_P20	73.14	66.41	10.24	0.29	2.69	4.19	22.65	23.88	1.06	6.88	9.48
TCGA-06-0238-01	11.5418	13.6317	8.8016	7.3695	8.1738	10.1096	10.0322	10.7642	6.5699	9.0494	9.9788	11.8247	7.1585	12.161	7.9994	13.2002	12.5525																					CGGA_P205	11.32	18.93	1.97	1.28	1.1	2.51	3.67	6.11	0.09	1	3.44
TCGA-06-0125-01	11.978	14.0951	9.0931	6.1759	7.8881	9.092	10.41	10.9059	4.9229	9.395	9.6223	11.5166	4.3326	13.0449	7.8631	13.4154	12.4758																					CGGA_P21	87.34	10.4	4.28	1.88	1.53	7.74	25.61	31.82	0.95	3.75	6.04
TCGA-06-0141-01	11.3728	13.0556	9.4611	9.3326	8.9403	10.4611	10.4954	12.1779	5.8702	9.442	9.4431	10.9595	7.6672	12.7515	9.2704	13.552	12.8004																					CGGA_P22	77.81	54.16	1.99	0.92	3.58	10.33	34.24	30.48	3.04	7.58	12.33
TCGA-06-0174-01	12.1327	14.9316	10.4105	6.0996	7.5279	9.3092	9.5982	16.4871	5.455	9.0263	9.9041	11.8279	5.3519	14.5199	7.3342	13.9405	13.3786																					CGGA_P23	8.03	8.21	0.56	0.48	1.31	4.79	5.7	5.14	0.1	2.1	4.33
TCGA-28-1747-01	12.0297	13.4025	8.8075	7.0702	8.502	10.2317	10.4353	10.423	6.157	9.2886	9.3483	11.1562	6.5444	12.1013	7.5021	12.9215	12.1242																					CGGA_P25	17.19	86.08	2.39	8.47	5.45	7.84	9.12	2.35	0.73	2.91	7.94
TCGA-12-0616-01	11.2784	14.8214	9.121	6.9547	7.7241	9.7435	9.932	16.7084	5.1269	8.7551	10.0875	12.0445	7.3267	13.618	7.7471	13.1109	13.5401																					CGGA_P265	24.7	18.09	3.69	0.45	0.5	2.93	3.87	5.34	0.73	1.33	11.76
TCGA-06-5415-01	15.5228	12.3092	9.8087	6.2917	7.2231	9.0854	10.3124	11.0749	5.7028	9.4951	9.876	11.7189	5.9223	12.6223	8.0199	13.2139	11.1891																					CGGA_P266	11.52	22.41	1.38	0.4	0.5	0.95	2.66	1.74	0.06	1.64	5.52
TCGA-28-2499-01	10.7774	15.7111	8.4263	5.1147	7.5299	8.7795	10.0176	10.9496	6.8137	8.9207	9.6275	10.8253	5.8264	12.791	9.0259	13.8315	12.7012																					CGGA_P27	68.99	37.46	6.34	0.92	2.54	4.98	20.67	10.42	0.17	5.15	41.92
TCGA-06-5411-01	11.0709	12.7836	8.6934	7.6196	8.2992	9.7021	9.5685	10.7285	4.5298	8.8164	10.6876	11.2245	6.0426	12.9586	7.8063	13.1398	12.6559																					CGGA_P271	8.35	20.1	3.88	0.25	0.81	1	5.44	1.34	0	3.07	2.18
TCGA-06-0211-01	11.9711	13.5493	10.39	7.4378	8.1495	9.8258	10.4234	10.3558	5.44385	9.59645	9.8291	11.6752	6.15625	13.341	8.05655	13.4402	12.8347																					CGGA_P28	54.75	152.92	5.1	2.33	4.08	10.63	26.8	78.88	2.02	11.26	27.92
TCGA-27-1835-01	12.251	12.6696	9.3189	5.216	7.5225	7.6433	10.6599	10.32	5.1081	8.756	9.9151	11.3582	5.7345	12.9953	8.409	13.1857	12.0754																					CGGA_P30	92.99	145.43	7.84	13.18	1.72	12	13.94	18.47	16.56	21.67	33.52
TCGA-28-5213-01	10.5854	12.7632	7.5623	7.8101	7.7747	10.5173	10.5892	10.6541	7.8276	9.977	9.4454	11.4417	7.6915	11.8399	9.5061	13.4781	12.8436																					CGGA_P31	54.15	26.47	3.77	4.39	4.28	4.81	16.24	21.91	2.83	5.93	27.06
TCGA-06-2561-01	11.101	14.4482	10.4003	7.2371	8.8479	9.8158	10.4569	11.8732	5.2334	9.8948	10.0894	10.6932	6.8711	12.1152	8.6576	13.8293	12.9339																					CGGA_P422	53.08	18.46	3.77	0.14	1.02	2.81	12.81	7.47	0.37	3.21	22.45
TCGA-14-2554-01	11.6698	12.2799	9.5779	7.6238	7.8785	10.2325	10.3549	11.082	7.3573	9.5128	10.3623	11.4111	6.495	12.627	8.0924	13.876	12.7548																					CGGA_P437	105.09	7.82	8.05	0.1	1.43	3.78	17.6	11.46	0.73	4.48	38.4
TCGA-06-2563-01	12.6241	14.4461	9.5946	6.625	8.2503	8.8942	10.3097	11.1516	6.547	9.2058	9.9155	11.6188	6.4016	13.6911	7.9115	13.2108	12.694																					CGGA_P468	79.99	9.01	5.91	0.2	1.52	4.74	12.21	10.43	0.36	5	24.9
TCGA-41-3915-01	11.9766	15.1832	9.5252	8.8439	8.8987	9.9691	10.1837	10.6137	5.898	9.5096	9.9587	11.0187	6.9176	13.5919	8.3993	13.5198	12.974																					CGGA_P609	34.67	15.09	1.69	2.3	2.76	8.51	16.07	63.77	3.31	1.65	21.56
TCGA-76-4932-01	12.2825	14.8916	9.9506	5.1629	7.9057	10.3321	10.102	10.8578	6.0153	9.3136	10.0221	11.1195	5.1428	14.2573	7.3895	13.3714	12.9311																					CGGA_P83	88.02	6.29	2.8	0.35	3	8.74	19.85	22.76	1.42	6.37	8.79
TCGA-06-5412-01	12.213	15.3803	8.9355	9.0667	8.815	10.6777	10.2588	10.7045	7.9874	9.9379	9.9557	11.2415	7.1601	14.3455	9.6083	14.7325	13.4223																					CGGA_P84	69.39	40.35	7.14	0.62	3.62	5.36	23.92	11.57	0.6	7.85	16.9
TCGA-26-5135-01	12.4853	13.7291	9.3702	8.476	9.5281	10.0795	10.0462	15.1122	7.6328	9.5551	10.0375	10.8848	6.4231	13.8317	8.3996	13.4469	13.0735																					CGGA_P86	78.76	11.51	10.16	0.19	0.89	2.02	19.81	17.17	0.82	5.18	13.64
TCGA-16-1045-01	11.2638	13.6382	9.7306	8.7903	9.399	10.4198	10.5309	10.957	7.063	10.0886	9.9974	10.2721	7.3095	12.1024	9.0833	13.6774	12.7993																					CGGA_P93	71.62	65.95	7.43	1.85	6.43	13.71	27.78	13.98	1.05	8.55	14.03
TCGA-06-0219-01	10.2934	13.2098	7.8698	6.3899	7.442	10.0082	10.0146	11.5427	6.7196	8.8321	10.2516	12.3938	5.7508	13.4151	7.8577	12.5399	13.3696
TCGA-06-2557-01	12.0314	13.9586	9.6084	8.6125	9.9464	10.7083	10.5622	11.225	5.8555	9.4867	9.5552	11.5954	8.2858	13.3751	8.7622	13.2718	13.033
TCGA-06-0157-01	12.1871	14.957	9.7153	8.2088	8.5569	9.9091	10.1825	10.8868	7.9821	8.8717	9.6422	12.131	7.0653	12.9806	7.971	13.1326	12.7562
TCGA-28-1753-01	12.1712	14.358	9.7456	8.0827	8.9825	9.809	10.1993	10.9556	5.742	9.3991	9.5817	11.4106	8.4217	13.9011	8.7145	13.4529	12.9732
TCGA-26-5139-01	12.0615	14.9096	10.2132	7.8164	8.3041	9.4295	9.5993	10.7841	5.8638	9.8564	9.7859	10.709	5.6847	13.9836	7.5719	13.7776	12.8471
TCGA-26-5136-01	11.6668	14.1731	8.4978	8.2841	8.7256	9.9253	10.5364	9.9973	6.1977	8.9621	9.6116	12.1065	7.9994	11.6821	8.074	13.1888	12.4173
TCGA-28-2509-01	11.8758	14.6353	10.7231	7.0197	8.2532	9.426	10.1859	10.4746	4.3247	9.6047	10.6304	12.1878	6.1321	14.0065	8.8405	13.505	13.4027
TCGA-06-0168-01	11.9071	12.9709	8.8374	8.0233	8.4962	10.4347	9.6003	11.1869	7.804	9.4711	10.3636	11.8007	7.2074	11.6254	9.6382	13.5078	12.4353
TCGA-76-4928-01	11.8916	15.5672	11.1454	8.9147	8.0296	9.9217	10.1256	11.0274	5.7902	9.826	9.892	10.8077	6.0884	14.7652	8.7364	14.3573	13.4453
TCGA-32-5222-01	11.52	14.9809	8.263	4.8406	7.6661	10.2344	9.7427	11.0774	5.5776	9.0941	9.6032	12.0288	6.4341	13.5538	7.5038	13.7378	12.9431
TCGA-12-1597-01	12.0032	15.1816	9.8346	5.2292	8.0296	9.9466	9.3157	11.0996	5.1213	8.1683	9.8453	12.5844	4.7384	14.3342	7.723	12.5974	12.867
TCGA-06-2567-01	11.7071	12.1025	10.3791	8.4173	8.6504	10.1667	10.6362	10.6288	6.7219	9.848	9.7945	12.1202	7.2906	10.114	9.2508	13.0368	12.1291
TCGA-27-2526-01	11.7317	11.3143	7.6947	4.9437	6.8809	9.4717	9.7138	15.5885	6.4328	8.8837	10.1931	11.7591	7.7447	13.1468	7.756	13.1033	12.734
TCGA-28-2513-01	12.2281	13.6586	9.6418	9.3528	8.4016	10.5651	10.4808	11.0413	7.6547	9.7336	9.8066	11.0145	7.1541	13.1226	9.4532	13.5775	12.7946
TCGA-32-2615-01	11.1617	13.8191	9.6174	8.2117	8.9817	9.7266	10.5072	11.1175	6.4279	10.1384	9.8872	10.8732	7.0337	12.4548	8.6271	13.5716	12.9797
TCGA-27-1834-01	11.0716	15.1371	8.6945	8.2922	9.0072	9.8526	10.5841	10.5525	5.6367	9.5108	9.3802	10.3976	7.3614	10.4281	7.7839	13.2868	12.0628
TCGA-14-0787-01	12.3327	14.1553	10.3988	7.9356	8.1125	9.521	10.4581	10.8103	7.5948	9.5973	9.871	12.3187	5.9866	13.5588	8.3233	13.8231	13.0591
TCGA-06-5418-01	12.1093	15.9156	7.9694	7.1742	8.0926	9.7657	10.3501	11.1886	6.424	9.8581	9.6775	10.843	4.1598	13.5045	8.8158	13.3686	12.7919
TCGA-12-5295-01	11.486	13.5718	8.4271	5.0529	7.7293	10.1102	10.0641	10.8853	5.3774	9.0277	9.7503	12.2236	7.1694	14.1417	8.5806	13.8281	13.1362
TCGA-12-3650-01	12.3953	13.2487	8.8849	5.2732	6.9674	9.5916	9.7635	10.8109	6.3177	9.0384	10.2335	12.6913	5.7797	14.9564	7.6839	12.7327	13.1241
TCGA-28-5220-01	10.8618	13.6422	8.3527	6.2783	7.0684	9.5866	10.2972	10.4395	5.8045	9.0339	9.4517	11.7034	5.5466	12.398	8.3451	13.6688	12.5391
TCGA-06-0190-01	12.214	14.9328	9.5807	8.7067	8.7387	10.0136	10.4913	11.8961	6.7396	10.1577	10.0143	11.5054	7.3928	14.4927	8.8463	13.5102	13.6104
TCGA-14-1825-01	11.8415	14.7492	8.7225	5.8544	7.3942	8.9493	10.4398	10.633	4.6095	8.0601	9.7796	11.6287	5.2399	13.034	6.5645	13.4354	12.2821
TCGA-12-0618-01	12.2639	16.2593	9.0984	5.8272	8.0215	8.7805	9.5546	10.3507	5.3598	8.8896	9.3733	11.0708	5.2891	13.6289	6.3139	12.8781	12.3317
TCGA-06-5413-01	11.8326	13.8093	8.729	7.5085	8.153	9.7846	10.1018	10.6929	5.2716	9.4637	9.7464	12.1307	7.0774	13.5752	8.5213	13.6566	12.9649
TCGA-12-0821-01	11.2303	16.0351	10.6366	6.6557	7.2914	8.3234	9.9125	10.8256	6.2787	9.395	10.2143	11.5953	6.121	13.5418	7.7723	14.1064	13.2703
TCGA-06-0158-01	11.9788	13.3923	10.6407	7.6819	8.7859	9.8851	10.5444	10.3527	6.237	9.5794	9.3992	11.1955	6.7072	12.3618	8.2183	13.3872	12.4083
TCGA-12-3653-01	12.5774	14.5388	9.3996	4.9753	6.8973	9.6441	10.0701	11.2993	9.1809	9.1628	10.2612	11.7912	6.3227	14.4727	8.0377	13.8201	13.1039
TCGA-27-2523-01	12.6097	14.916	9.7409	6.7651	7.6153	9.7276	10.1883	10.8505	5.4552	9.1199	9.8184	12.2077	5.1057	14.1681	7.8175	13.5029	12.8813
TCGA-27-2524-01	12.3623	14.1164	7.9245	7.8702	7.8629	10.5485	8.955	10.7974	7.0264	9.8994	10.3575	12.0336	5.9838	15.3678	7.7708	13.5988	13.4332
TCGA-14-0817-01	11.7344	12.1824	8.5428	7.3197	8.4639	11.0416	10.0615	10.0188	8.4523	9.1626	10.2063	12.4891	7.0928	13.5043	8.7451	12.7924	13.045
TCGA-26-5134-01	11.2031	14.2862	9.9554	7.2345	7.8614	9.2124	9.7198	11.4681	5.5261	8.3433	9.6625	11.7928	6.5104	13.2173	7.5662	13.2849	12.713
TCGA-19-5960-01	10.8733	13.5437	12.1474	5.7352	7.1842	7.7304	10.084	9.7159	3.5855	9.7041	10.0211	11.9834	5.417	11.2155	7.1705	13.5766	12.399
TCGA-28-5215-01	11.2987	14.4614	9.2318	7.775	8.7017	9.6766	10.3882	10.3091	5.0394	9.5962	9.5263	11.383	7.0952	11.7067	7.3865	13.7151	12.5003
TCGA-19-2619-01	12.1307	13.1997	10.2061	6.0667	7.4131	8.9138	10.2327	10.4406	6.2667	9.6997	10.462	10.8969	5.2145	13.4207	7.8101	13.3501	12.6418
TCGA-14-1034-01	12.1903	14.818	10.1487	7.3305	8.6568	9.8768	9.9718	10.227	6.5723	9.8888	10.065	11.8046	6.3123	13.0878	8.49	13.4135	12.9223
TCGA-06-5856-01	10.9933	14.7714	9.7781	6.2405	8.2307	9.432	10.2155	16.4222	5.8041	9.8179	9.8332	11.9324	6.222	13.3452	7.6493	13.4114	13.7415
TCGA-32-4213-01	12.2383	14.6972	9.0641	8.1473	8.6625	10.1146	9.6805	12.0861	7.671	9.2041	9.8431	11.7933	7.547	14.1921	8.791	14.2077	13.1674
TCGA-06-0646-01	11.4029	14.4394	8.5824	9.2059	9.1711	10.0439	10.2938	10.8095	8.2553	9.6659	9.6659	10.9047	7.2386	12.7035	8.6721	13.1704	12.8618
TCGA-19-2620-01	12.0801	14.0146	10.8554	5.9835	7.7002	9.422	10.3284	10.7373	5.3995	9.4374	9.4046	10.3428	5.2685	12.5295	7.9503	13.401	12.1034
TCGA-06-0138-01	11.0596	14.3459	9.3178	8.116	8.2166	9.9186	10.3644	16.0195	6.4263	8.5818	10.1166	11.6152	6.3305	12.6758	8.2032	12.6993	13.208
TCGA-41-4097-01	11.3635	16.052	10.9408	8.4265	9.4859	9.8255	10.4314	11.4712	6.4674	10.1043	9.9848	10.3232	7.0636	13.9091	9.2982	13.5854	13.5596
TCGA-28-5204-01	12.1431	12.8216	8.9723	5.4531	7.7147	10.4463	10.2795	10.9593	5.4531	9.8185	9.6686	11.5445	6.1535	13.8647	8.0297	13.6356	12.8307
TCGA-32-2634-01	11.8925	14.5081	9.7668	7.1417	7.8439	8.8515	10.1646	11.1597	5.1834	9.1914	9.8653	12.8048	6.1862	12.3742	8.0274	13.3229	12.7047
TCGA-76-4926-01	11.6403	13.3558	10.0713	6.7019	7.8851	8.5947	10.6348	10.5848	5.2009	9.2916	9.5509	11.1797	5.0655	12.3532	7.9877	13.4318	12.2645
TCGA-32-1970-01	11.9318	13.7194	9.9903	6.3798	8.1965	9.3221	10.3847	10.4402	6.2278	9.7333	9.7391	11.1819	5.5253	12.8854	8.0173	13.1955	12.5661
TCGA-76-4929-01	11.2008	15.5304	10.3127	5.1317	8.3085	9.2675	10.267	10.7104	5.012	9.7449	9.4787	11.1794	6.5411	12.4046	7.9851	13.0313	12.7886
TCGA-15-0742-01	12.5199	12.7592	9.4259	6.7099	7.5082	9.0569	10.273	10.8401	6.3492	9.3981	9.6877	12.247	4.656	14.3382	8.2107	14.1773	12.7755
TCGA-06-0645-01	11.919	13.8015	9.0697	9.7886	9.2856	10.895	10.3501	10.9555	7.7986	10.0879	9.7374	11.1406	7.0916	13.0542	9.3262	14.1087	12.9982
TCGA-27-2528-01	12.1115	15.6981	9.2133	5.5886	8.0193	9.1982	10.1482	10.8523	4.7894	9.3966	9.6484	11.9534	4.2181	14.087	7.3969	13.8921	12.9571
TCGA-14-0789-01	11.9829	15.3878	10.7754	8.6171	9.3312	10.2905	10.0793	10.6624	6.8097	10.0392	9.8877	9.8004	6.8258	13.4826	7.6392	14.1062	12.9118
TCGA-08-0386-01	12.4775	15.5132	9.1943	5.7548	7.2843	8.4306	10.2286	9.9083	6.8076	9.2667	10.1461	11.7129	3.9225	12.542	8.1809	12.4691	12.2847
TCGA-76-4931-01	12.2585	13.5401	9.7392	6.3399	7.7395	8.9197	10.1916	10.7021	5.6557	9.2713	9.6507	11.4194	4.6972	13.7023	8.2166	13.3219	12.486
TCGA-27-1830-01	11.847	14.8015	10.0881	8.7575	9.129	9.5616	10.4898	10.5547	5.5812	9.8925	9.4533	10.6311	6.5581	12.5211	8.1003	13.7923	12.5694
TCGA-06-0184-01	12.1326	14.5053	9.0437	7.6269	8.4681	10.7735	10.5519	11.2742	6.3903	9.9966	10.1792	11.6108	6.7339	13.702	8.7892	12.2942	13.2984
TCGA-12-3652-01	12.1726	16.125	8.2465	5.0502	5.306	8.6672	9.3359	10.9614	7.7483	8.6256	10.0863	12.0176	4.9637	15.7719	8.5705	14.3145	13.2693
TCGA-06-0187-01	12.2903	14.465	9.6939	7.4372	8.6974	10.9516	10.5028	15.3444	6.9592	10.1318	10.0003	10.7031	5.4537	13.0014	8.3794	13.4347	13.1119
TCGA-14-1823-01	10.7617	12.2141	9.2898	8.1939	8.1023	10.497	10.1631	12.7172	6.0825	9.1539	10.2695	11.6722	6.8921	10.8239	7.6904	13.741	12.5277
TCGA-02-2486-01	11.7748	14.9714	9.0255	8.7013	8.4579	10.4554	9.6825	11.2228	6.6318	9.4331	9.2844	11.1507	8.0632	12.9503	9.173	14.1744	12.7121
TCGA-19-1390-01	11.5758	14.7702	10.6186	6.5071	7.8668	8.6697	10.0209	10.757	4.7357	8.7053	9.993	10.8727	4.8419	14.1461	6.52	13.1259	12.7751
TCGA-32-1980-01	11.3899	14.1165	9.741	8.4185	9.6129	10.2802	9.6891	11.0632	5.0136	9.2301	11.1898	10.5258	7.0156	12.3284	8.1567	13.106	12.7818
TCGA-06-0747-01	12.826	16.0029	11.2705	6.98	7.6453	8.5504	10.4981	10.4931	6.4981	9.4196	9.3561	11.7285	2.6882	13.0085	8.2699	14.1372	12.3529
TCGA-06-0649-01	11.0889	15.1361	9.8957	8.2113	9.1426	10.2876	10.4272	10.187	5.1949	9.4736	9.3939	10.8742	7.1519	11.7989	8.5548	12.7287	12.5746
TCGA-28-5209-01	12.0709	14.5795	10.0183	6.4997	7.9626	8.847	9.8349	10.726	5.8127	9.6854	9.8307	11.3236	5.104	13.4978	7.5682	13.6378	12.6959
TCGA-28-5208-01	11.9524	13.326	9.4398	6.8868	8.1105	9.7469	10.24	10.3798	5.0059	9.301	9.6591	11.6375	6.0577	13.3348	7.8299	13.9308	12.6048
TCGA-06-0686-01	12.091	14.442	9.0419	6.9693	8.0507	9.3742	10.042	15.797	5.5045	9.0174	9.6698	11.2171	6.6566	14.1315	7.5842	13.1534	13.0916
TCGA-76-4927-01	12.0022	13.6175	9.7992	8.659	8.5915	9.9603	10.2988	10.6577	6.2874	9.4524	9.4491	11.484	6.1142	13.8542	8.2697	13.4244	12.8536
TCGA-28-5207-01	11.007	12.9	10.6375	5.7672	7.9902	9.5341	10.299	11.3471	5.4483	9.2063	10.9581	11.2835	6.9557	11.3814	8.3323	13.1946	12.6494
TCGA-06-2558-01	11.7123	13.9316	8.6328	7.6798	8.7288	9.6673	10.2577	10.6009	6.0366	9.168	9.7088	11.576	5.9801	12.6237	7.7321	13.266	12.5159
TCGA-06-0644-01	11.9832	15.4228	10.1179	8.7008	8.998	10.3242	9.723	10.37	6.801	9.9741	9.9841	11.3166	7.6318	13.9589	8.8033	14.5073	13.3181
TCGA-06-2562-01	12.1052	14.4462	10.7707	8.2144	8.4889	9.7888	10.48	11.1582	5.888	9.6469	9.9207	11.1311	5.149	13.2887	8.6178	13.9806	12.8453
TCGA-06-2559-01	11.8928	16.0189	10.3652	6.9637	7.8439	8.9702	10.0199	10.8355	6.1128	9.5831	9.8727	11.2568	5.668	13.418	7.6578	13.6859	12.9336
TCGA-26-5132-01	12.4438	14.6377	9.4301	6.3376	7.8362	8.9548	10.277	17.1633	6.2301	9.8345	10.0395	12.2118	7.1484	13.1563	9.0114	13.3489	13.3486
TCGA-12-5299-01	12.111	14.0719	9.9862	7.8228	7.8255	10.1308	9.8919	10.6594	6.5319	9.6291	9.9417	11.2042	4.2452	14.4847	8.0861	13.7688	13.0046
TCGA-06-0743-01	12.0977	14.0441	9.4718	7.957	8.1843	9.0978	10.5064	10.3576	7.1112	9.1213	8.7185	11.3474	6.5749	12.4445	8.3965	13.0338	12.1046
TCGA-41-2572-01	12.2812	15.0644	7.6121	6.6505	7.5618	9.3993	9.9335	11.2702	8.9626	8.9626	9.7957	11.7077	5.6906	14.6274	8.2863	13.7118	13.0103
TCGA-06-0744-01	12.1847	11.4729	10.0913	7.1328	8.0881	9.5828	10.5174	10.2379	5.4123	9.0462	9.6781	11.4139	5.6636	13.4583	7.9214	12.7909	12.3182
TCGA-06-0130-01	11.7044	12.4818	9.1597	9.2985	10.2498	10.4933	10.1466	11.6007	7.9987	10.4803	9.9915	11.937	9.4803	11.9007	9.6399	13.6141	13.044
TCGA-06-0749-01	11.3603	13.427	8.6552	6.5058	8.5453	10.2214	10.0875	10.029	5.3309	8.9422	10.3874	10.6967	6.271	10.5247	8.5606	12.3594	11.8042
TCGA-06-1804-01	11.724	14.6805	10.1971	7.8042	8.3376	8.8304	10.5901	10.3217	5.7169	9.1994	9.4104	11.752	6.2583	9.5517	8.6991	13.0208	11.6436
TCGA-06-5414-01	12.0357	12.3127	9.9587	8.1269	8.5831	9.8371	10.5624	10.6685	6.8815	9.7511	9.5551	11.3126	6.2979	12.5797	8.5073	13.5319	12.4553
TCGA-06-5408-01	12.2085	14.388	11.0743	6.6621	8.2099	8.844	9.8404	10.8763	6.8834	10.2778	10.0394	11.4951	5.4689	14.0076	8.689	13.7631	13.136
TCGA-06-2569-01	11.9928	15.2271	11.5062	9.2264	6.2489	8.979	9.8579	10.2092	7.3182	8.8328	10.0345	11.2608	2.9275	11.5945	8.8057	13.7142	11.9783
TCGA-26-5133-01	11.5045	11.6449	10.806	6.4393	6.8375	8.2878	10.0498	10.4077	4.9587	9.2514	10.064	11.0457	5.3444	11.6765	6.953	13.1667	11.9011
TCGA-32-2632-01	12.6136	15.1718	8.2783	8.2809	9.1286	10.5398	10.3384	11.3149	8.9205	9.78	10.1216	12.5968	8.0173	13.8033	8.9073	13.4228	13.4552
TCGA-76-4925-01	12.5219	14.4118	9.9554	6.4526	7.6554	8.6017	10.1708	10.6659	4.8295	9.5999	9.7438	11.8075	4.4596	15.5699	7.2097	13.9615	13.1899
TCGA-06-0745-01	11.4124	14.3174	8.9309	7.8567	8.0189	9.6213	9.8938	10.7831	6.0609	9.2074	10.0277	12.1964	6.7193	14.6932	8.7831	13.506	13.4942
TCGA-27-2519-01	11.0867	13.1025	8.494	8.9102	8.7022	10.2055	10.3973	10.5865	6.6365	9.6511	9.5707	11.6881	6.9127	11.3829	8.2607	13.5573	12.5086
TCGA-14-0790-01	11.9386	14.7404	9.0683	3.5755	6.156	8.6524	10.0457	10.7319	6.4087	8.327	9.2811	11.2538	5.5673	13.6011	7.8218	13.6468	12.2426
TCGA-14-1829-01	9.9019	13.6514	7.956	6.991	6.8246	10.0826	10.0452	11.3042	5.7023	8.1463	10.0211	12.4399	6.1505	12.2371	7.4542	13.2319	12.9444
TCGA-28-2514-01	12.0497	15.9723	9.6126	6.6579	8.5007	9.3609	9.5133	10.3068	6.1597	9.1478	9.9326	10.5119	5.3278	12.9449	7.9268	13.0737	12.3504
TCGA-06-0878-01	11.2713	14.061	9.7277	8.078	8.2636	9.6327	10.3306	11.4719	7.5992	10.2425	9.7686	10.9719	6.3497	13.3927	8.5836	14.2987	13.254
TCGA-06-5859-01	10.7649	11.6451	9.3715	5.5379	7.7327	9.5485	10.3888	11.5458	5.5788	9.8718	9.1809	11.5028	7.3507	9.5511	7.626	12.9426	11.8214
TCGA-19-2624-01	12.3484	14.227	9.7952	6.1692	7.0689	8.3253	9.9757	17.2375	5.3583	8.7759	9.7516	11.7532	5.0523	14.1984	7.3353	13.4584	13.0164
TCGA-02-0055-01	11.3619	13.8804	12.5069	9.0459	9.6396	9.7262	10.1755	9.9915	7.0341	10.8061	10.6136	11.4917	7.1296	13.6313	9.7175	14.2058	13.792
TCGA-27-1837-01	12.4774	14.186	9.5834	7.6238	8.6957	10.0967	10.3785	10.913	6.945	9.2547	9.6857	11.0271	4.1253	13.9035	8.1084	12.9532	12.6157
TCGA-06-0132-01	11.4407	13.2015	9.0934	9.3416	9.0806	11.1561	9.7286	10.9674	5.9239	9.2757	11.2181	10.3821	7.0232	10.7974	8.7231	12.9993	12.2455
TCGA-06-5858-01	11.8605	15.9938	8.1638	7.3348	8.3825	9.539	10.2186	10.4037	3.9621	9.5886	10.4576	11.2777	5.6105	13.5777	8.0764	13.8163	13.0457
TCGA-14-0871-01	11.9742	14.8593	10.9803	9.8721	7.2997	9.6887	9.7109	10.0478	8.7236	9.8422	9.8169	10.9197	4.3341	13.1638	8.4079	13.3637	12.6905
TCGA-32-2638-01	11.9684	15.4307	10.3388	7.8854	8.5195	9.7031	10.3954	10.8807	7.8116	9.5144	9.748	11.1697	6.4508	12.8422	8.2445	13.604	12.8324
TCGA-06-5410-01	11.7165	12.1904	9.1025	10.0126	9.7973	11.623	10.5011	11.2604	7.3269	10.1278	9.5706	10.849	8.7449	13.1834	10.3271	14.2681	13.0427
TCGA-41-5651-01	11.8259	14.5131	10.1135	5.4881	6.9626	8.5633	9.5461	10.4396	4.3578	9.5924	9.6733	12.5877	5.6191	12.7411	6.1392	13.158	12.599
TCGA-06-2564-01	11.7944	13.3821	10.2129	6.8255	8.5215	9.7128	10.4632	11.58	5.8632	10.0832	9.6822	10.9311	5.6383	12.7551	7.5927	13.5832	12.7012
TCGA-06-0882-01	12.0325	11.8915	10.0616	9.3361	9.2741	10.3511	10.3819	11.3373	6.915	9.7408	10.1761	10.9317	6.336	12.4411	8.7402	13.0231	12.5267
TCGA-12-0619-01	12.6452	14.5737	8.9706	8.7577	8.9145	10.1681	10.5024	10.683	5.946	10.175	10.6086	11.5065	7.0127	13.1158	8.9614	13.4055	13.0188
TCGA-14-0781-01	11.962	14.1865	10.0492	9.0552	8.7774	9.6952	10.4261	11.2984	6.8644	9.6986	9.9715	10.4375	6.0433	14.0404	9.0924	13.7853	13.0337
TCGA-41-2571-01	12.2202	14.775	9.9813	6.8186	7.9696	9.9652	9.5931	15.3695	5.3381	9.0347	9.6236	11.8656	5.0611	14.2567	6.7173	12.0715	13.1238
TCGA-19-2625-01	12.2096	14.7673	9.6539	7.4857	7.5929	8.6676	10.491	10.915	7.5462	9.6308	10.0311	11.452	4.4926	12.553	8.8011	12.925	12.5453
TCGA-06-2565-01	11.9829	14.016	10.6094	5.836	8.0592	9.3784	10.5952	11.3912	5.4006	9.0438	9.394	11.2241	6.5885	13.4342	7.7008	13.3499	12.6438
TCGA-02-2485-01	11.9955	13.0207	10.4547	5.1604	7.0177	8.3157	10.1953	9.9638	6.6514	8.5591	10.2527	11.6719	7.1493	13.0119	7.1444	13.0482	12.3788
TCGA-06-0210-01	12.0938	16.4419	10.7185	8.9812	8.8706	9.9276	10.4365	11.1535	6.0831	9.8706	9.9928	10.648	6.8301	14.9966	8.1005	14.2815	13.6385
TCGA-02-0047-01	11.6722	15.7883	9.1692	8.2968	8.1609	10.0057	10.3282	10.5174	4.7777	9.6283	9.5358	10.6375	6.2477	12.2075	8.3656	13.6094	12.4725
TCGA-06-0750-01	11.3854	15.0731	9.3654	8.5973	8.364	9.4284	10.4557	11.2446	8.4699	9.7341	9.4124	10.9032	6.4908	14.1055	9.3654	13.927	13.3149
TCGA-32-1982-01	11.7296	16.2375	9.7041	8.5936	8.9097	10.0981	10.2836	11.0603	6.3296	9.1773	9.9605	11.0682	7.2422	14.7108	8.7029	13.1003	13.5144
TCGA-FG-6688-01	11.5	14.354	9.1817	7.3416	7.9562	10.1418	10.2315	10.9849	5.2327	9.3595	9.1121	10.8542	6.0459	9.1169	8.0068	14.0855	11.3384
TCGA-DU-6404-01	12.4692	14.5898	10.6034	5.3672	7.9228	8.081	9.9652	10.3815	5.5311	8.9943	9.8349	9.908	5.3672	12.7857	7.1296	13.4417	11.8321
TCGA-VW-A8FI-01	12.1867	11.751	9.9183	6.7743	8.0336	9.2372	10.1948	10.5851	6.1563	8.1349	8.3869	10.8692	6.7264	13.2533	7.963	12.9471	11.6354
TCGA-DU-8165-01	11.0739	13.1548	9.7828	7.7378	8.9403	9.3435	10.6297	10.9074	4.938	9.5649	10.8513	12.0423	7.1962	9.7213	8.4762	14.2432	12.3907
TCGA-S9-A6U0-01	12.0848	14.6327	9.8196	7.4208	8.5267	9.4875	10.8237	10.4228	6.0976	9.9301	10.2336	10.1532	8.0609	13.4031	8.975	13.4645	12.924
TCGA-FG-7643-01	11.1531	11.9396	10.397	6.7592	8.3369	8.8052	9.4181	10.4001	4.5972	9.0017	10.2803	9.3911	4.6398	11.0057	7.3333	13.0531	11.4025
TCGA-DU-6403-01	12.0783	13.0039	10.7192	6.1154	8.4162	9.867	9.8286	10.6489	6.1585	9.2461	10.0359	11.0714	5.4279	12.1018	7.3754	13.2273	12.1184
TCGA-CS-5395-01	11.1922	13.9554	10.7016	4.2018	7.5257	8.3943	10.0202	10.226	4.9538	8.9789	9.5915	11.1475	4.8088	11.9758	7.347	13.2015	12.1133
TCGA-FG-8181-01	11.2002	12.2471	10.4569	7.8915	8.4965	7.4895	8.8764	9.7006	3.2092	8.3234	10.8436	8.4059	3.7622	8.3908	7.3679	12.8024	10.0834
TCGA-FG-5963-01	11.4667	12.864	11.3861	8.3118	9.1641	10.7494	10.199	10.6125	5.3297	9.0944	9.3749	10.3317	7.6665	12.0669	8.1218	13.873	12.2234
TCGA-DU-7292-01	11.7079	12.8275	10.6688	6.1616	8.0471	7.8752	9.6584	10.2603	5.7296	8.8109	10.8023	9.944	4.0575	11.8754	7.4727	13.1903	11.7301
TCGA-HT-A5RC-01	11.6554	13.0567	10.8802	6.1882	8.1978	9.6983	10.4111	11.1714	3.384	9.4823	9.2303	11.1987	4.8288	12.308	7.8693	13.7422	12.2431
TCGA-TM-A84C-01	12.3083	12.0121	10.3577	8.5344	8.3613	8.9985	9.8531	10.4702	4.9227	9.2242	9.1103	9.2616	4.3856	9.6499	6.9932	13.9448	10.4496
TCGA-FG-A4MW-01	12.0905	13.5623	9.338	6.2595	7.2172	9.0618	9.9314	11.2375	6.1096	8.899	9.2115	10.6641	4.5234	13.1932	7.5224	13.2135	12.007
TCGA-DB-A75P-01	11.9961	12.6611	11.0235	6.7854	9.014	8.8913	10.0696	10.4366	5.3517	9.3379	10.2788	9.2518	6.5129	13.0306	8.5101	13.4577	12.1316
TCGA-S9-A89V-01	11.1965	15.0746	12.2253	7.0206	9.2291	9.7711	9.8795	10.7487	4.4424	9.3011	9.1299	8.9426	4.834	8.1076	7.2534	12.6419	10.7519
TCGA-CS-6186-01	11.5157	12.3945	10.9069	5.4463	7.4704	8.6358	10.72	10.361	6.694	8.9964	9.3141	10.1887	4.7684	11.7891	7.8226	12.427	11.7338
TCGA-DU-6406-01	12.1694	13.8842	10.8727	5.2251	8.0924	9.6207	10.5132	10.9945	7.0511	9.2722	9.8491	11.8039	5.4264	13.6126	7.8278	13.7319	12.8881
TCGA-S9-A6UA-01	11.8298	13.9107	10.8367	9.2331	9.2185	10.5275	10.1439	11.6959	5.0899	9.465	9.6252	10.4006	7.6927	10.6361	8.3934	14.4357	11.9652
TCGA-DU-A7TB-01	11.5578	12.6067	8.9043	4.6969	7.6079	8.9216	10.3223	10.5242	4.756	8.8398	9.0899	9.5752	3.6092	11.0684	6.6751	13.0526	11.0716
TCGA-DU-A76K-01	11.7027	15.1203	10.3949	6.5859	7.0926	7.2813	9.9561	9.7895	5.5116	8.4824	10.4757	10.5532	4.5023	11.1037	8.2401	12.8048	11.6296
TCGA-S9-A7IX-01	11.33	11.9412	9.9851	7.2595	8.7649	9.7146	10.2913	10.6975	5.89	9.5751	10.4187	10.0309	5.89	11.8974	8.5511	13.0463	12.2458
TCGA-DU-A7TD-01	12.1293	13.8197	9.8653	7.4024	9.1238	9.4656	10.4899	10.8698	7.8079	9.632	9.5218	11.023	6.5405	12.9351	8.097	13.9134	12.5986
TCGA-QH-A6CS-01	11.3193	12.3217	10.1519	6.4957	8.1932	9.7043	10.7883	10.5031	5.8223	8.7765	8.5791	9.8825	4.9817	10.2071	8.1024	13.1008	11.0916
TCGA-CS-4941-01	11.5148	14.05	9.5181	7.4787	9.0796	9.8064	10.3002	15.661	5.8039	9.5741	10.3472	10.2839	7.2943	11.4043	8.2961	13.153	12.6732
TCGA-HT-7691-01	11.5165	12.8926	10.4781	6.8261	8.3269	9.3042	9.9452	11.4727	5.4565	9.6187	9.4078	10.263	5.8344	8.5255	7.5509	13.8277	11.0116
TCGA-DU-6392-01	11.9846	10.5349	9.4457	7.8705	8.8842	9.6877	9.5128	10.7156	4.033	9.4749	10.6567	10.6397	5.2289	9.5613	7.2553	13.3117	11.1064
TCGA-DU-7012-01	10.7758	14.864	9.53	7.8896	9.5639	10.1981	10.6271	10.5319	4.3873	9.8229	9.1206	10.15	8.863	10.1098	8.6998	13.4888	12.1149
TCGA-DU-6402-01	12.2696	13.9261	10.311	9.2838	8.2727	9.7156	10.3277	11.512	6.1806	9.9804	10.213	11.2079	7.3316	13.3207	8.3808	14.07	13.0124
TCGA-FG-A87Q-01	11.8381	12.8179	10.5629	6.6532	8.8592	10.2588	10.2529	10.67	7.9837	9.3894	9.3884	10.2346	6.6532	11.5324	8.2476	12.9052	11.9267
TCGA-HT-8104-01	11.8085	13.8513	9.6448	5.4134	7.5701	9.1567	10.423	10.297	5.4134	9.4176	9.4176	11.5092	4.8792	11.8871	7.3903	13.4997	12.1173
TCGA-QH-A6XC-01	11.8733	13.062	9.7943	6.7003	7.5728	8.6928	10.1269	9.9551	6.3848	8.8461	9.4923	10.685	4.5049	13.4537	8.1776	13.3046	12.1341
TCGA-FG-A4MU-01	12.0652	15.0254	10.4173	8.4453	8.6437	9.7442	10.186	10.8099	6.0244	9.6835	9.6366	11.2379	6.2279	13.386	8.5954	13.9286	12.8772
TCGA-TM-A7C3-01	11.6302	14.2573	10.819	6.6876	7.6073	7.8939	10.6102	11.0095	6.0531	8.7632	9.3718	10.7644	6.1461	12.9394	7.9388	13.2566	12.3458
TCGA-DB-A64O-01	10.9744	15.6976	9.8624	6.8084	8.0801	9.2015	10.2592	10.8507	5.8279	8.8453	9.7715	10.2443	4.1015	9.1173	8.2103	13.0044	11.4249
TCGA-DU-A5TT-01	11.3498	14.9547	9.3928	7.0849	7.4121	8.9004	10.2037	10.6372	5.7583	9.5205	9.9758	10.4441	5.4657	10.8594	7.9138	13.4703	12.0117
TCGA-P5-A5EY-01	11.6339	11.9437	10.7494	6.0399	8.4532	8.4595	9.673	10.1616	4.6718	8.745	10.9383	9.3408	5.9235	11.4627	7.4127	13.0608	11.537
TCGA-CS-5397-01	11.4905	12.1583	10.9376	7.5007	8.4614	9.163	10.1554	10.8119	4.1809	8.9393	10.594	10.6109	4.2074	11.0891	7.8778	13.1969	11.8215
TCGA-HW-A5KK-01	11.2641	13.1783	10.3501	8.8933	9.5151	10.5226	10.5112	10.7219	5.1176	9.3154	8.877	10.1953	6.4823	10.5588	8.5387	13.1285	11.7143
TCGA-CS-6669-01	10.9951	11.0149	10.6094	8.0374	8.9402	8.0671	8.4117	9.9427	2.0656	7.7599	10.3974	8.6029	1.8996	5.9327	6.8023	12.6788	8.94987
TCGA-S9-A7R2-01	11.0814	13.8183	10.5693	7.526	9.0059	10.1464	10.2275	10.72	5.147	9.1545	9.6538	9.8948	7.2827	10.4108	8.4399	13.0839	11.8242
TCGA-S9-A6WM-01	12.1612	15.3407	10.6596	5.4268	7.4819	8.3479	10.1359	10.1768	5.613	9.5028	9.354	10.5331	5.6288	13.3595	8.4109	13.1503	12.362
TCGA-FG-A70Z-01	11.9223	13.5319	9.6073	8.0285	8.5512	9.7786	9.9498	10.3077	6.8788	8.9787	9.8451	10.667	5.935	12.7388	8.6554	13.0578	12.2334
TCGA-HT-7680-01	11.0169	12.4896	10.7281	4.4999	8.7085	9.067	10.1908	11.3432	3.1647	9.9308	8.9611	10.413	5.1508	7.2298	7.5255	13.8369	10.6634
TCGA-P5-A5F6-01	11.9018	13.153	10.9743	5.0708	7.9611	12.249	8.9065	10.891	3.8364	10.5401	9.3869	10.7285	5.3092	8.026	6.9209	13.3588	10.9685
TCGA-HT-8110-01	11.0555	12.7086	8.6823	7.8918	8.9931	10.4515	10.8812	10.7087	6.2174	9.4337	9.3093	10.8873	6.5903	10.8933	8.4239	13.2517	12.1247
TCGA-DU-A76L-01	12.0872	15.5777	10.6673	8.2691	8.6219	9.5621	9.736	11.8601	6.4023	9.6469	9.4964	11.2809	5.5705	14.0657	7.6297	14.2065	13.0748
TCGA-HT-8558-01	10.9383	11.0684	10.2097	7.5024	8.9036	8.6713	8.4641	9.8751	2.812	8.2889	10.4527	9.0621	3.1935	8.3622	6.92	12.8613	10.0693
TCGA-HT-A61C-01	11.7109	12.987	9.7081	8.327	8.3992	9.418	9.6409	10.9728	6.6716	8.9134	9.7383	11.5994	6.148	15.3047	7.9614	14.0707	13.188
TCGA-QH-A6CV-01	11.5126	12.8831	9.4058	5.8326	7.7731	9.8205	10.3885	11.476	6.5594	9.0247	9.0692	12.0329	6.5414	12.6426	8.1735	13.6909	12.521
TCGA-FG-6692-01	12.5763	14.4284	9.3462	6.9744	7.5195	8.7281	10.3232	10.6224	8.3897	9.1724	9.3794	10.5541	6.7113	14.2011	8.5304	14.2997	12.5119
TCGA-DU-7013-01	11.3615	12.1836	10.8448	5.927	7.9365	9.1065	10.5397	10.4479	5.4556	9.0535	9.8163	10.8259	6.8408	12.2144	7.3452	13.6509	12.2615
TCGA-KT-A7W1-01	12.4252	13.7037	9.8383	5.9045	7.3361	8.0185	10.4146	11.2521	7.0002	9.7223	9.6294	11.4298	5.5053	14.0084	7.7229	13.5239	12.7309
TCGA-HT-A5RA-01	12.2378	13.6427	9.6459	6.4712	7.6636	8.8377	10.4417	10.8383	6.7263	9.414	9.8962	11.1578	5.8441	14.5707	8.6003	14.0967	12.9434
TCGA-CS-6188-01	11.6851	12.4791	10.9174	6.7214	8.4408	9.4304	10.403	10.6881	3.8462	9.6619	9.2269	10.9188	4.2813	11.6793	7.6793	13.8208	11.9204
TCGA-DU-A7TJ-01	12.0419	12.6976	10.3226	7.5249	8.2185	9.4939	10.4693	10.441	5.6167	9.3719	9.3054	11.0067	5.2733	12.9694	7.6257	13.3749	12.2482
TCGA-DU-A5TY-01	11.7169	12.3991	10.5923	7.8184	9.0468	10.3315	10.2038	14.7558	5.8676	9.3775	9.5602	11.1388	7.8128	11.143	8.2976	13.4737	12.3366
TCGA-DU-5847-01	11.3168	12.2447	9.0655	9.0079	9.1037	9.8934	10.9874	11.2454	5.5861	9.6315	10.1644	11.9736	7.2564	9.9381	9.3679	13.8752	12.2497
TCGA-HT-7882-01	11.8083	15.3394	10.6629	9.2939	9.7985	9.4824	10.2808	10.9727	6.2331	11.3099	9.9712	10.0644	8.2019	14.4358	9.3776	14.1694	13.725
TCGA-DU-5854-01	11.5473	13.3539	10.921	6.3019	8.8032	9.9853	10.2459	11.1277	4.7462	9.5484	9.0445	10.6109	6.1403	11.9796	8.0729	13.3989	12.1608
TCGA-HT-8011-01	12.0752	13.4754	10.4698	5.0955	8.0496	8.1861	10.4932	10.7031	2.9213	9.2979	9.7688	11.7432	5.3929	12.6182	6.5449	13.3543	12.2901
TCGA-DU-5852-01	11.707	15.162	10.3752	6.2765	8.792	9.7852	10.2216	10.5198	4.5949	9.1105	9.9581	11.0308	6.2765	13.4818	8.2853	13.4689	12.8583
TCGA-P5-A72U-01	12.2611	14.071	9.5814	8.1689	8.1689	9.276	10.7777	10.9412	8.1201	9.5575	10.1017	9.7598	7.6445	14.5131	9.0477	13.5067	12.9879
TCGA-VM-A8CD-01	11.3547	12.6746	9.7996	7.6023	8.3875	9.1704	10.2854	10.7262	7.4747	10.5024	9.8567	10.2834	5.9625	11.9113	8.0699	13.7734	12.4665
TCGA-HT-8107-01	11.0624	10.8982	10.7156	8.0977	8.6028	8.4182	8.8249	10.2292	3.2176	8.5572	10.5955	8.8149	3.8911	9.1042	7.5397	12.4996	10.416
TCGA-HT-8564-01	11.0908	12.8646	11.6026	7.309	8.5199	9.0208	9.7837	10.649	4.0858	9.0383	10.181	9.625	5.6239	12.0426	8.4934	12.7231	12.0433
TCGA-DU-8162-01	11.1573	12.7097	10.4043	7.1068	8.4965	8.6989	9.1513	10.2666	3.6809	8.6439	10.8939	9.5925	4.2664	10.8087	7.5139	13.1289	11.4195
TCGA-HT-7854-01	11.83	12.5636	10.9289	6.6146	8.9043	9.477	9.9237	10.518	4.2174	9.3816	9.5774	9.6662	5.4273	8.5739	6.6818	12.8229	10.6517
TCGA-VM-A8C9-01	11.5666	11.6661	10.0497	9.2907	9.1524	10.6322	9.5686	10.4373	6.9967	8.5	8.8277	9.9455	7.0941	9.1554	9.2262	13.2662	10.6686
TCGA-HT-7860-01	11.5932	13.9169	10.6703	6.1027	8.6624	9.5862	10.7047	10.4217	5.5017	9.7972	9.5596	10.1388	6.5201	11.5981	8.4365	13.3364	12.191
TCGA-DU-7006-01	11.9316	14.5299	10.4697	7.7001	8.9867	10.0343	10.2856	10.9465	4.019	9.9312	9.2771	10.4204	6.6317	12.1974	8.3084	14.1056	12.3257
TCGA-HT-7469-01	11.7159	13.5338	11.9432	5.7041	6.8289	8.2271	10.1905	10.812	4.5924	9.6524	9.1784	10.6973	3.429	11.6985	6.3819	13.5276	11.8136
TCGA-DU-8161-01	11.286	14.4199	9.7184	8.5958	8.7869	9.6236	10.6531	10.7817	5.9504	9.5221	9.3936	10.0354	7.7256	11.5083	8.3041	13.7024	12.2668
TCGA-DH-5140-01	11.0143	12.674	11.4918	5.2082	8.2386	8.3373	9.8006	10.6299	4.1314	8.7912	10.5548	11.1041	5.535	11.298	6.478	13.2844	12.0827
TCGA-HT-8015-01	11.1256	12.0414	10.9533	7.9952	9.1313	9.0695	9.1517	10.6066	4.2282	8.5089	10.6534	9.5226	4.6152	10.6892	7.6094	13.1837	11.3531
TCGA-DU-6405-01	11.8368	12.2442	10.9239	4.9299	8.0214	8.9108	10.3743	10.8739	5.6835	9.2756	9.5046	10.8481	4.9299	11.9822	8.0938	13.3812	11.9199
TCGA-HT-8019-01	11.2451	11.6332	10.4736	8.2181	9.1399	7.8958	8.807	9.7824	3.1243	7.8294	11.2514	8.7721	2.894	8.7054	8.1259	12.5738	10.1577
TCGA-HT-A74H-01	11.1246	14.4982	9.7906	7.0283	8.5374	9.6933	10.1633	10.4822	5.0933	8.9352	9.5947	10.6633	6.2913	8.5078	8.1683	13.6403	11.2294
TCGA-DU-7290-01	10.8097	13.4097	9.9216	8.861	8.7258	10.2086	10.5538	11.7092	4.0138	9.7844	9.6839	10.8581	6.8021	10.4183	8.3798	14.0686	12.3091
TCGA-HT-A4DS-01	11.3417	10.484	9.7578	7.751	8.1597	9.9115	9.2453	9.9654	6.6197	9.2335	9.3012	10.7895	6.9916	13.7446	9.6211	13.0848	12.3231
TCGA-TM-A84B-01	11.9483	12.5931	10.36	5.0553	7.0358	7.7113	10.404	12.4523	6.7549	8.8912	9.7227	10.88	6.3376	12.007	7.2679	13.169	11.9668
TCGA-DU-8158-01	10.956	15.6387	9.7207	7.8452	8.7785	9.6316	10.6758	11.1172	5.1927	9.6757	9.5516	10.1315	7.638	10.8546	7.941	13.4626	12.3808
TCGA-TM-A84J-01	13.3313	13.1066	9.6148	6.1345	7.0937	7.6318	10.0502	10.6315	5.4989	9.0578	9.8913	10.7789	3.7566	12.3248	6.503	13.5037	11.3376
TCGA-HT-A617-01	11.1945	12.7033	10.5164	6.5096	8.0073	9.0942	10.1189	11.2295	8.1544	9.3011	9.6464	10.4394	7.8127	12.3113	8.2026	12.978	12.4358
TCGA-HT-7857-01	11.8816	15.577	10.8816	10.2461	10.8319	11.5169	10.311	11.4736	5.4941	9.8966	9.3286	10.4642	7.9465	11.4249	9.2161	13.9669	12.5485
[truncated: 6 more columns]
